# Supplementary material for: Nrf1 Is Endowed with a Dominant Tumor-Repressing Effect onto the Wnt/β-Catenin-Dependent and Wnt/β-Catenin-Independent Signaling Networks in the Human Liver Cancer
Source: Oxid Med Cell Longev. 2020 Mar 23;2020:5138539. doi: 10.1155/2020/5138539 (PMC7125503; doi:10.1155/2020/5138539)
Supplement: Supplementary 2 — Table S1: the key resources used in this work. Table S2: the sequencing data of genes encoding proteasomal subunits. Table S3: the sequencing data of genes involved in Wnt/β-catenin signaling pathway. Table S4: the promoters, the enhancer ARE/AP1-binding sequences, and the corresponding mutation sequences of the representative genes of Wnt/β-catenin signaling components. Table S5: the sequencing data of genes involved in the interactive network of Nrf1 interactors, migration and invasion pathways, carcinoma related pathways, signal transduction pathways, and metabolism pathways. Table S6: the sequencing data of DEGs whose RPKM values are greater than 3 in at least one cell line (shNC- or shNrf1-HepG2). Table S7: the sequencing data of genes implicated in the focal adhesion and ECM-receptor interaction. Table S8: the sequencing data of genes responsible for the pathways involved in cancer. Table S9: the promoters, the enhancer ARE-binding sequences, and the corresponding mutation sequences of PTEN, p53, CDH1, VAV1, PDGFB, and MMP9. [file 5138539.f2.zip]

Archive with 9 entries (9 files):
- Table S1_The key resources used in this work.docx
- Table S2_Figure S5A.xlsx
- Table S3_Figure 4G&S5B.xlsx
- Table S4_ARE- or AP1-binding sequences.docx
- Table S5_Figure 6C.xlsx
- Table S6_Figure 6E.xlsx
- Table S7_Figure S8A.xlsx
- Table S8_Figure S8B.xlsx
- Table S9_ARE binding sequences in Figure S9B.docx
