# Supplementary material for: Nrf1 Is Endowed with a Dominant Tumor-Repressing Effect onto the Wnt/β-Catenin-Dependent and Wnt/β-Catenin-Independent Signaling Networks in the Human Liver Cancer
Source: Oxid Med Cell Longev. 2020 Mar 23;2020:5138539. doi: 10.1155/2020/5138539 (PMC7125503; doi:10.1155/2020/5138539)
Supplement: Supplementary 2 — Table S1: the key resources used in this work. Table S2: the sequencing data of genes encoding proteasomal subunits. Table S3: the sequencing data of genes involved in Wnt/β-catenin signaling pathway. Table S4: the promoters, the enhancer ARE/AP1-binding sequences, and the corresponding mutation sequences of the representative genes of Wnt/β-catenin signaling components. Table S5: the sequencing data of genes involved in the interactive network of Nrf1 interactors, migration and invasion pathways, carcinoma related pathways, signal transduction pathways, and metabolism pathways. Table S6: the sequencing data of DEGs whose RPKM values are greater than 3 in at least one cell line (shNC- or shNrf1-HepG2). Table S7: the sequencing data of genes implicated in the focal adhesion and ECM-receptor interaction. Table S8: the sequencing data of genes responsible for the pathways involved in cancer. Table S9: the promoters, the enhancer ARE-binding sequences, and the corresponding mutation sequences of PTEN, p53, CDH1, VAV1, PDGFB, and MMP9. [file 5138539.f2.zip › Table S5_Figure 6C.xlsx]

## Sheet: Sheet1
①Nrf1 interactions
Symbol	GeneID	Gene_length	shNC-RPKM	shNrf1-RPKM	log2 Ratio(shNrf1/shNC)	Up-Down-Regulation(shNrf1/shNC)	P-value	FDR	Description	KEGG Orthology	GO Component	GO Function	GO Process	Blast nr
BIK	638	966	1.04284	12.5894	3.59362	Up	4.3321e-23	4.05244e-22	BCL2-interacting killer (apoptosis-inducing)	-	GO:0031224//intrinsic to membrane;GO:0031967	GO:0019904//protein domain specific binding;GO:0046983//protein dimerization activity	GO:0001836//release of cytochrome c from mitochondria;GO:0008406//gonad development;GO:0012502//induction of programmed cell death;GO:0032461//positive regulation of protein oligomerization;GO:0048232//male gamete generation	gi|4502411|ref|NP_001188.1|/5.1234e-72/1
CCDC88A	55704	9827	2.25526	4.41163	0.96802	Up	3.33696e-15	2.17231e-14	coiled-coil domain containing 88A	K08408;K11499	GO:0016020//membrane;GO:0031252//cell leading edge;GO:0031410//cytoplasmic vesicle;GO:0043231//intracellular membrane-bounded organelle	GO:0005543//phospholipid binding;GO:0015631//tubulin binding;GO:0019901//protein kinase binding;GO:0042802//identical protein binding	GO:0006260//DNA replication;GO:0008283//cell proliferation;GO:0030031//cell projection assembly;GO:0030036//actin cytoskeleton organization;GO:0031175//neuron projection development;GO:0032147//activation of protein kinase activity;GO:0035556//intracellular signal transduction;GO:0048870//cell motility	gi|50897852|ref|NP_060554.3|/0/1
CEBPB	1051	2113	31.8366	53.5582	0.750421	Up	1.16522e-24	1.14638e-23	CCAAT/enhancer binding protein (C/EBP), beta	K10048	GO:0000785//chromatin;GO:0034399//nuclear periphery	GO:0000981//sequence-specific DNA binding RNA polymerase II transcription factor activity;GO:0003677//DNA binding;GO:0030528//transcription regulator activity;GO:0035258//steroid hormone receptor binding;GO:0042802//identical protein binding;GO:0046983//protein dimerization activity	GO:0001701//in utero embryonic development;GO:0002237//response to molecule of bacterial origin;GO:0002376//immune system process;GO:0002526//acute inflammatory response;GO:0006357//regulation of transcription from RNA polymerase II promoter;GO:0012502//induction of programmed cell death;GO:0030855//epithelial cell differentiation;GO:0032675//regulation of interleukin-6 production;GO:0043066//neg…	gi|28872796|ref|NP_005185.2|/1.6641e-123/1
FAM76B	143684	3958	1.01807	3.75541	1.88313	Up	2.09196e-14	1.3088e-13	family with sequence similarity 76, member B	-	-	-	-	gi|134288896|ref|NP_653265.3|/2.03987e-160/1
FOSB	2354	3776	0.918928	1.75946	0.937109	Up	0.00283696	0.00668651	FBJ murine osteosarcoma viral oncogene homolog B	K09029	GO:0043231//intracellular membrane-bounded organelle	GO:0001071//nucleic acid binding transcription factor activity;GO:0003677//DNA binding;GO:0005515//protein binding;GO:0043566//structure-specific DNA binding;GO:0046983//protein dimerization activity	GO:0006357//regulation of transcription from RNA polymerase II promoter;GO:0009605//response to external stimulus;GO:0014072;GO:0022414//reproductive process;GO:0032501//multicellular organismal process;GO:0050896//response to stimulus;GO:0051384//response to glucocorticoid stimulus;GO:0051592//response to calcium ion	gi|166999783|ref|NP_001107643.1|/8.23096e-116/1
HCFC1	3054	8436	25.17	41.246	0.71255	Up	3.4505e-66	9.13582e-65	host cell factor C1 (VP16-accessory protein)	K14966	GO:0000123//histone acetyltransferase complex;GO:0016585//chromatin remodeling complex;GO:0035097//histone methyltransferase complex	GO:0001071//nucleic acid binding transcription factor activity;GO:0003712//transcription cofactor activity;GO:0005515//protein binding	GO:0006351//transcription, DNA-dependent;GO:0006461//protein complex assembly;GO:0019042;GO:0031647//regulation of protein stability;GO:0051726//regulation of cell cycle	gi|98986457|ref|NP_005325.2|/0/1
HDAC9	9734	4659	0.0720743	0.580067	3.00866	Up	2.56652e-05	7.94886e-05	histone deacetylase 9	K11409	GO:0016585//chromatin remodeling complex;GO:0034708	GO:0003712//transcription cofactor activity;GO:0008134//transcription factor binding;GO:0016564//transcription repressor activity;GO:0017136//NAD-dependent histone deacetylase activity;GO:0019901//protein kinase binding	GO:0000122//negative regulation of transcription from RNA polymerase II promoter;GO:0002042//cell migration involved in sprouting angiogenesis;GO:0006952//defense response;GO:0016575//histone deacetylation;GO:0030098//lymphocyte differentiation;GO:0032868//response to insulin stimulus;GO:0048641//regulation of skeletal muscle tissue development;GO:0051147//regulation of muscle cell differentiation	gi|40788348|dbj|BAA34464.2|/0/1
HIST1H4C	8364	390	5.74007	8.66196	0.593625	Up	0.154466	0.243416	histone cluster 1, H4c	K11254	-	-	-	gi|194223075|ref|XP_001498098.2|/2.83559e-40/1
HIST1H4E	8367	377	2.0783	0.298688	-2.79869	Down	0.0399144	0.0753054	histone cluster 1, H4e	K11254	-	-	-	gi|397465423|ref|XP_003804496.1|/5.0718e-45/1
HIST1H4I	8294	370	1.21007	0.608678	-0.991338	Down	0.458066	0.591824	histone cluster 1, H4i	K11254	GO:0000785//chromatin;GO:0043231//intracellular membrane-bounded organelle	GO:0003676//nucleic acid binding	GO:0034728//nucleosome organization	gi|194940914|ref|XP_001983122.1|/1.5974e-40/1
JUN	3725	3338	2.582	6.98302	1.43536	Up	2.95854e-15	1.92976e-14	jun proto-oncogene	K04448	GO:0000785//chromatin;GO:0031981//nuclear lumen;GO:0043234//protein complex;GO:0044444//cytoplasmic part	GO:0000981//sequence-specific DNA binding RNA polymerase II transcription factor activity;GO:0003712//transcription cofactor activity;GO:0005099//Ras GTPase activator activity;GO:0030528//transcription regulator activity;GO:0042802//identical protein binding;GO:0043565//sequence-specific DNA binding;GO:0043566//structure-specific DNA binding;GO:0046332//SMAD binding;GO:0046983//protein dimerizati…	GO:0000165//MAPK cascade;GO:0000302//response to reactive oxygen species;GO:0001933//negative regulation of protein phosphorylation;GO:0001935//endothelial cell proliferation;GO:0002224//toll-like receptor signaling pathway;GO:0002237//response to molecule of bacterial origin;GO:0002763//positive regulation of myeloid leukocyte differentiation;GO:0003007//heart morphogenesis;GO:0006275//regulatio…	gi|49456409|emb|CAG46525.1|/3.31753e-132/1
JUNB	3726	1832	79.9772	55.0734	-0.538232	Down	4.0178e-18	3.01117e-17	jun B proto-oncogene	K09028	GO:0031981//nuclear lumen;GO:0044427//chromosomal part	GO:0001071//nucleic acid binding transcription factor activity;GO:0003712//transcription cofactor activity;GO:0030528//transcription regulator activity;GO:0043566//structure-specific DNA binding;GO:0046983//protein dimerization activity	GO:0001503//ossification;GO:0001825//blastocyst formation;GO:0002573//myeloid leukocyte differentiation;GO:0003006//developmental process involved in reproduction;GO:0007049//cell cycle;GO:0008283//cell proliferation;GO:0009314//response to radiation;GO:0009605//response to external stimulus;GO:0045595//regulation of cell differentiation;GO:0045897//positive regulation of transcription during mit…	gi|338726913|ref|XP_001915090.2|/9.31189e-136/1
KEAP1	9817	2606	31.6122	14.605	-1.11402	Down	3.6626e-34	4.876e-33	kelch-like ECH-associated protein 1	K10456	GO:0005815//microtubule organizing center;GO:0005911//cell-cell junction;GO:0005924//cell-substrate adherens junction;GO:0031981//nuclear lumen	-	GO:0043009//chordate embryonic development;GO:0045595//regulation of cell differentiation	gi|218478071|dbj|BAA09481.3|/0/1
MAFF	23764	2476	3.61652	7.504	1.05306	Up	3.37974e-08	1.39297e-07	v-maf musculoaponeurotic fibrosarcoma oncogene homolog F (avian)	K09037	GO:0031981//nuclear lumen	GO:0001071//nucleic acid binding transcription factor activity;GO:0003677//DNA binding	GO:0006351//transcription, DNA-dependent;GO:0007599//hemostasis;GO:0022414//reproductive process;GO:0043009//chordate embryonic development;GO:0045595//regulation of cell differentiation;GO:0050896//response to stimulus	gi|6912490|ref|NP_036455.1|/1.10882e-54/1
MAFG-AS1	92659	1914	0.409362	2.3533	2.52324	Up	5.62736e-07	2.06937e-06	MAFG antisense RNA 1 (head to head)	K08857	-	-	-	gi|119610122|gb|EAW89716.1|/4.98787e-71/1
MAFIP	727764	2758	1.09577	3.22546	1.55756	Up	2.44608e-07	9.31593e-07	MAFF interacting protein (pseudogene)	K04688	GO:0005930//axoneme;GO:0015630//microtubule cytoskeleton	-	GO:0007010//cytoskeleton organization	gi|74356358|gb|AAI04659.1|/2.41354e-114/1
MAFK	7975	3350	5.44621	12.1009	1.15179	Up	1.64362e-18	1.26036e-17	v-maf musculoaponeurotic fibrosarcoma oncogene homolog K (avian)	K09037	GO:0031981//nuclear lumen	GO:0001071//nucleic acid binding transcription factor activity;GO:0003677//DNA binding	GO:0006351//transcription, DNA-dependent;GO:0007599//hemostasis;GO:0048731	gi|21732424|emb|CAD38575.1|/2.87901e-92/1
MYO1B	4430	5113	15.9151	4.16242	-1.93491	Down	1.62455e-74	4.81775e-73	myosin IB	K10356	GO:0015629//actin cytoskeleton;GO:0042995//cell projection	GO:0008092//cytoskeletal protein binding;GO:0017111//nucleoside-triphosphatase activity;GO:0032559	GO:0048731	gi|44889481|ref|NP_036355.2|/0/1
MYO5A	4644	12238	1.54571	0.699299	-1.14429	Down	2.59514e-09	1.16317e-08	myosin VA (heavy chain 12, myoxin)	K10357	GO:0015629//actin cytoskeleton;GO:0030427//site of polarized growth;GO:0031252//cell leading edge;GO:0042995//cell projection	GO:0008092//cytoskeletal protein binding;GO:0032559	GO:0030029//actin filament-based process;GO:0051234//establishment of localization	gi|215982794|ref|NP_001135967.1|/0/1
NFE2L1	4779	4891	72.8664	20.2142	-1.84989	Down	3.10394e-301	4.9868e-299	nuclear factor (erythroid-derived 2)-like 1	K09040	GO:0043231//intracellular membrane-bounded organelle	GO:0000989//transcription factor binding transcription factor activity;GO:0001071//nucleic acid binding transcription factor activity;GO:0003677//DNA binding;GO:0005515//protein binding	GO:0006351//transcription, DNA-dependent;GO:0006779//porphyrin-containing compound biosynthetic process;GO:0006952//defense response;GO:0032502//developmental process	gi|21748606|dbj|BAC03440.1|/0/1
NFKB1	4790	4093	11.8686	24.678	1.05608	Up	3.15326e-38	4.67564e-37	nuclear factor of kappa light polypeptide gene enhancer in B-cells 1	K02580	GO:0031981//nuclear lumen;GO:0043234//protein complex;GO:0044444//cytoplasmic part	GO:0001071//nucleic acid binding transcription factor activity;GO:0030528//transcription regulator activity;GO:0043565//sequence-specific DNA binding	GO:0000122//negative regulation of transcription from RNA polymerase II promoter;GO:0002224//toll-like receptor signaling pathway;GO:0007169//transmembrane receptor protein tyrosine kinase signaling pathway;GO:0009612//response to mechanical stimulus;GO:0010742//macrophage derived foam cell differentiation;GO:0010883//regulation of lipid storage;GO:0010894//negative regulation of steroid biosynth…	gi|397519725|ref|XP_003830004.1|/0/1
OGT	8473	5497	24.8623	37.6717	0.599521	Up	5.64456e-30	6.70059e-29	O-linked N-acetylglucosamine (GlcNAc) transferase	K09667	GO:0035097//histone methyltransferase complex;GO:0044444//cytoplasmic part	GO:0005529;GO:0008375//acetylglucosaminyltransferase activity;GO:0016407//acetyltransferase activity;GO:0030234//enzyme regulator activity	GO:0002763//positive regulation of myeloid leukocyte differentiation;GO:0006486//protein glycosylation;GO:0023052//signaling;GO:0030162//regulation of proteolysis;GO:0031062//positive regulation of histone methylation;GO:0032526//response to retinoic acid;GO:0051260//protein homooligomerization	gi|32307150|ref|NP_858059.1|/0/1
RICTOR	253260	9535	3.22823	6.4481	0.998132	Up	6.22958e-22	5.53934e-21	RPTOR independent companion of MTOR, complex 2	K08267	GO:0043234//protein complex;GO:0044444//cytoplasmic part	GO:0005488//binding	GO:0007169//transmembrane receptor protein tyrosine kinase signaling pathway;GO:0007275//multicellular organismal development;GO:0009967//positive regulation of signal transduction;GO:0010627//regulation of intracellular protein kinase cascade;GO:0030036//actin cytoskeleton organization;GO:0031294;GO:0048017//inositol lipid-mediated signaling	gi|59891448|ref|NP_689969.2|/0/1
SKP1	6500	2714	76.4218	123.476	0.692174	Up	9.83238e-61	2.34785e-59	S-phase kinase-associated protein 1	K03094	GO:0031461//cullin-RING ubiquitin ligase complex;GO:0031981//nuclear lumen;GO:0044444//cytoplasmic part	GO:0005488//binding;GO:0016772//transferase activity, transferring phosphorus-containing groups;GO:0019787//small conjugating protein ligase activity	GO:0006796//phosphate-containing compound metabolic process;GO:0043161//proteasomal ubiquitin-dependent protein catabolic process;GO:0051320//S phase;GO:0051439//regulation of ubiquitin-protein ligase activity involved in mitotic cell cycle	gi|397491251|ref|XP_003816586.1|/5.39977e-69/1
SMAD7	4092	3088	5.54582	3.02664	-0.873686	Down	5.79966e-06	1.93416e-05	SMAD family member 7	K04677	GO:0005815//microtubule organizing center;GO:0005911//cell-cell junction;GO:0019897//extrinsic to plasma membrane;GO:0031981//nuclear lumen;GO:0043234//protein complex	GO:0005072//transforming growth factor beta receptor, cytoplasmic mediator activity;GO:0005160//transforming growth factor beta receptor binding;GO:0019899//enzyme binding;GO:0032403//protein complex binding;GO:0043565//sequence-specific DNA binding;GO:0046332//SMAD binding	GO:0000122//negative regulation of transcription from RNA polymerase II promoter;GO:0001837//epithelial to mesenchymal transition;GO:0001933//negative regulation of protein phosphorylation;GO:0003254//regulation of membrane depolarization;GO:0006942//regulation of striated muscle contraction;GO:0007179//transforming growth factor beta receptor signaling pathway;GO:0016337//cell-cell adhesion;GO:0…	gi|471417018|ref|XP_004390028.1|/4.34235e-133/1
TGFB1	7040	2217	25.2439	18.2851	-0.465269	Down	2.6868e-06	9.29178e-06	transforming growth factor, beta 1	K13375	GO:0031012//extracellular matrix;GO:0031091//platelet alpha granule;GO:0043005//neuron projection;GO:0044297//cell body;GO:0044431//Golgi apparatus part	GO:0005160//transforming growth factor beta receptor binding;GO:0030528//transcription regulator activity;GO:0042802//identical protein binding;GO:0046983//protein dimerization activity	GO:0000082//G1/S transition of mitotic cell cycle;GO:0001658//branching involved in ureteric bud morphogenesis;GO:0001773//myeloid dendritic cell activation;GO:0001819//positive regulation of cytokine production;GO:0001837//epithelial to mesenchymal transition;GO:0001934//positive regulation of protein phosphorylation;GO:0002246//wound healing involved in inflammatory response;GO:0002260//lymphoc…	gi|395751234|ref|XP_002829306.2|/0/1
TOP1	7150	3734	27.6081	39.9578	0.533382	Up	3.70152e-18	2.78042e-17	topoisomerase (DNA) I	K03163	GO:0005694//chromosome;GO:0031981//nuclear lumen;GO:0043025//neuronal cell body	GO:0003682//chromatin binding;GO:0003916//DNA topoisomerase activity;GO:0032559	GO:0006261//DNA-dependent DNA replication;GO:0006796//phosphate-containing compound metabolic process;GO:0008219//cell death;GO:0009790//embryo development;GO:0042221//response to chemical stimulus;GO:0051704	gi|473581|gb|AAB60379.1|/0/1
TSC1	7248	8626	3.77603	5.84828	0.631142	Up	4.24962e-09	1.87078e-08	tuberous sclerosis 1	K07206	GO:0015629//actin cytoskeleton;GO:0030427//site of polarized growth;GO:0031252//cell leading edge;GO:0042598;GO:0043234//protein complex;GO:0044444//cytoplasmic part	GO:0005515//protein binding;GO:0060589	GO:0001932//regulation of protein phosphorylation;GO:0001954//positive regulation of cell-matrix adhesion;GO:0006412//translation;GO:0007169//transmembrane receptor protein tyrosine kinase signaling pathway;GO:0008283//cell proliferation;GO:0008361//regulation of cell size;GO:0008366//axon ensheathment;GO:0009968//negative regulation of signal transduction;GO:0010921//regulation of phosphatase ac…	gi|4507693|ref|NP_000359.1|/0/1
VCP	7415	3859	140.386	99.066	-0.502933	Down	1.72002e-55	3.74511e-54	valosin containing protein	K13525	GO:0031981//nuclear lumen;GO:0042598;GO:0043234//protein complex;GO:0044444//cytoplasmic part	GO:0017111//nucleoside-triphosphatase activity;GO:0019902//phosphatase binding;GO:0032559;GO:0043130//ubiquitin binding	GO:0006281//DNA repair;GO:0006886//intracellular protein transport;GO:0006915//apoptotic process;GO:0006984//ER-nucleus signaling pathway;GO:0009207;GO:0031331;GO:0032446//protein modification by small protein conjugation;GO:0043161//proteasomal ubiquitin-dependent protein catabolic process;GO:0048193//Golgi vesicle transport;GO:0051259//protein oligomerization;GO:0070841	gi|148670554|gb|EDL02501.1|/0/1
②Focal adhesion
Symbol	GeneID	Gene_length	shNC-RPKM	shNrf1-RPKM	log2 Ratio(shNrf1/shNC)	Up-Down-Regulation(shNrf1/shNC)	P-value	FDR	Description	KEGG Orthology	GO Component	GO Function	GO Process	Blast nr
ZNF469	84627	13203	0.00847772	3.02772	8.48034	Up	8.3877e-106	3.5318e-104	zinc finger protein 469	K06236	GO:0043231//intracellular membrane-bounded organelle	GO:0003676//nucleic acid binding;GO:0046914//transition metal ion binding	-	gi|188536004|ref|NP_001120936.1|/0/1
SRC	6714	4145	0.0540079	10.8123	7.64529	Up	9.46094e-117	4.44772e-115	v-src sarcoma (Schmidt-Ruppin A-2) viral oncogene homolog (avian)	K05704	GO:0005624//membrane fraction;GO:0019866//organelle inner membrane;GO:0044430//cytoskeletal part;GO:0044444//cytoplasmic part;GO:0044459//plasma membrane part	GO:0004713//protein tyrosine kinase activity;GO:0005506//iron ion binding;GO:0019901//protein kinase binding;GO:0019904//protein domain specific binding;GO:0030674//protein binding, bridging;GO:0032559;GO:0035258//steroid hormone receptor binding	GO:0000302//response to reactive oxygen species;GO:0001666//response to hypoxia;GO:0001894//tissue homeostasis;GO:0003018;GO:0006006//glucose metabolic process;GO:0006468//protein phosphorylation;GO:0006915//apoptotic process;GO:0006935//chemotaxis;GO:0007169//transmembrane receptor protein tyrosine kinase signaling pathway;GO:0007264//small GTPase mediated signal transduction;GO:0007292//female …	gi|4885609|ref|NP_005408.1|/0/1
MUC13	56667	2899	0.308883	54.2246	7.45575	Up	0	0	mucin 13, cell surface associated	K06588	GO:0031224//intrinsic to membrane	-	-	gi|308736985|ref|NP_149038.3|/0/1
VAV1	7409	2944	0.01	1.26222	6.97982	Up	1.05103e-10	5.19021e-10	vav 1 guanine nucleotide exchange factor	K05730	GO:0016020//membrane;GO:0044444//cytoplasmic part	GO:0001071//nucleic acid binding transcription factor activity;GO:0005088//Ras guanyl-nucleotide exchange factor activity;GO:0043169//cation binding	GO:0006917//induction of apoptosis;GO:0007169//transmembrane receptor protein tyrosine kinase signaling pathway;GO:0007266//Rho protein signal transduction;GO:0007599//hemostasis;GO:0009966//regulation of signal transduction;GO:0010467//gene expression;GO:0031294	gi|7108367|ref|NP_005419.2|/0/1
COL25A1	84570	5702	0.0392604	4.62113	6.87903	Up	1.26752e-67	3.39951e-66	collagen, type XXV, alpha 1	K06237;K06236	GO:0005576//extracellular region;GO:0016020//membrane;GO:0044421//extracellular region part	GO:0005488//binding;GO:0005515//protein binding;GO:0005539//glycosaminoglycan binding	-	gi|38570075|ref|NP_942014.1|/0/1
RASGEF1B	153020	2269	0.01	1.14144	6.83471	Up	1.1091e-07	4.37194e-07	RasGEF domain family, member 1B	K07376;K06277;K08018	GO:0044464//cell part	GO:0005083//small GTPase regulator activity	GO:0009966//regulation of signal transduction	gi|22749129|ref|NP_689758.1|/0/1
COL5A3	50509	6192	0.01	0.854725	6.41739	Up	6.15054e-15	3.95566e-14	collagen, type V, alpha 3	K06236	-	-	-	gi|296232847|ref|XP_002807839.1|/0/1
PDGFD	80310	3997	0.01	0.704312	6.13814	Up	2.75614e-08	1.14566e-07	platelet derived growth factor D	K05450	GO:0012505//endomembrane system;GO:0044432//endoplasmic reticulum part	GO:0005102//receptor binding	GO:0001932//regulation of protein phosphorylation;GO:0048522//positive regulation of cellular process	gi|15451921|ref|NP_149126.1|/0/1
ITGA7	3679	4150	0.0269714	1.11249	5.36621	Up	8.84286e-12	4.71733e-11	integrin, alpha 7	K06583	GO:0005887//integral to plasma membrane	GO:0004871//signal transducer activity	GO:0007166//cell surface receptor signaling pathway;GO:0031589//cell-substrate adhesion;GO:0048513//organ development;GO:0065008	gi|68533127|dbj|BAE06118.1|/0/1
DOCK8	81704	7470	0.0899047	1.83907	4.35444	Up	1.23468e-29	1.45213e-28	dedicator of cytokinesis 8	K13708;K05727	GO:0044444//cytoplasmic part	GO:0019899//enzyme binding;GO:0030695//GTPase regulator activity;GO:0032561//guanyl ribonucleotide binding	GO:0007599//hemostasis	gi|238231392|ref|NP_982272.2|/0/1
C19orf57	79173	2420	0.508779	8.46868	4.05703	Up	1.38763e-41	2.22074e-40	chromosome 19 open reading frame 57	K06236	-	-	-	gi|31543148|ref|NP_077299.3|/0/1
COL6A1	1291	4246	1.63442	24.3192	3.89524	Up	2.02192e-197	1.85882e-195	collagen, type VI, alpha 1	K06238	GO:0005886//plasma membrane;GO:0030934	GO:0019838//growth factor binding	GO:0006935//chemotaxis;GO:0009987//cellular process	gi|87196339|ref|NP_001839.2|/0/1
PDGFA	5154	2809	2.23146	26.9387	3.59362	Up	3.98906e-136	2.33254e-134	platelet-derived growth factor alpha polypeptide	K04359	GO:0012505//endomembrane system;GO:0031091//platelet alpha granule;GO:0042995//cell projection;GO:0044421//extracellular region part;GO:0044432//endoplasmic reticulum part	GO:0019838//growth factor binding;GO:0042802//identical protein binding;GO:0043498//cell surface binding;GO:0046983//protein dimerization activity;GO:0070851//growth factor receptor binding	GO:0001934//positive regulation of protein phosphorylation;GO:0006275//regulation of DNA replication;GO:0006661//phosphatidylinositol biosynthetic process;GO:0006887//exocytosis;GO:0006935//chemotaxis;GO:0007169//transmembrane receptor protein tyrosine kinase signaling pathway;GO:0007178//transmembrane receptor protein serine/threonine kinase signaling pathway;GO:0008284//positive regulation of c…	gi|77695917|ref|NP_002598.4|/3.38198e-98/1
NRARP	441478	2639	2.84176	33.6664	3.56645	Up	1.61913e-158	1.19613e-156	NOTCH-regulated ankyrin repeat protein	K06270;K12329	-	-	GO:0001525//angiogenesis;GO:0001667//ameboidal cell migration;GO:0001935//endothelial cell proliferation;GO:0006357//regulation of transcription from RNA polymerase II promoter;GO:0008593//regulation of Notch signaling pathway;GO:0016337//cell-cell adhesion;GO:0030177//positive regulation of Wnt receptor signaling pathway;GO:0045580//regulation of T cell differentiation	gi|12849161|dbj|BAB28231.1|/1.51955e-68/1
POF1B	79983	3949	0.0850327	0.998023	3.55298	Up	3.26628e-08	1.34789e-07	premature ovarian failure, 1B	K10395;K04514;K11499	-	GO:0008092//cytoskeletal protein binding	-	gi|193794853|ref|NP_079197.3|/0/1
ANTXR2	118429	8058	0.416721	2.62718	2.65636	Up	1.33892e-29	1.5725e-28	anthrax toxin receptor 2	K06238	GO:0031090//organelle membrane;GO:0031224//intrinsic to membrane;GO:0043231//intracellular membrane-bounded organelle	GO:0004871//signal transducer activity;GO:0043169//cation binding	-	gi|62089412|dbj|BAD93150.1|/0/1
PEAR1	375033	4866	0.437052	1.68931	1.95056	Up	6.53044e-09	2.84234e-08	platelet endothelial aggregation receptor 1	K06252	GO:0031224//intrinsic to membrane	-	-	gi|122937343|ref|NP_001073940.1|/0/1
THBS1	7057	5820	6.46202	21.8633	1.75845	Up	1.07907e-101	4.38732e-100	thrombospondin 1	K04659	GO:0005615//extracellular space;GO:0009986//cell surface;GO:0031091//platelet alpha granule	GO:0001948//glycoprotein binding;GO:0005102//receptor binding;GO:0005518//collagen binding;GO:0005539//glycosaminoglycan binding;GO:0005543//phospholipid binding;GO:0017134//fibroblast growth factor binding;GO:0032403//protein complex binding;GO:0043498//cell surface binding;GO:0046872//metal ion binding;GO:0071813//lipoprotein particle binding	GO:0000165//MAPK cascade;GO:0001818//negative regulation of cytokine production;GO:0001935//endothelial cell proliferation;GO:0001953//negative regulation of cell-matrix adhesion;GO:0002468;GO:0002504//antigen processing and presentation of peptide or polysaccharide antigen via MHC class II;GO:0002690//positive regulation of leukocyte chemotaxis;GO:0002696//positive regulation of leukocyte activa…	gi|62089410|dbj|BAD93149.1|/0/1
RAC3	5881	1077	8.41824	28.0207	1.7349	Up	6.07864e-25	6.04867e-24	ras-related C3 botulinum toxin substrate 3 (rho family, small GTP binding protein Rac3)	K07861;K04392	GO:0005884//actin filament;GO:0016020//membrane;GO:0030427//site of polarized growth;GO:0031252//cell leading edge;GO:0042995//cell projection;GO:0044297//cell body;GO:0044444//cytoplasmic part	GO:0017111//nucleoside-triphosphatase activity;GO:0032561//guanyl ribonucleotide binding	GO:0007010//cytoskeleton organization;GO:0009207;GO:0009966//regulation of signal transduction;GO:0030030//cell projection organization;GO:0035556//intracellular signal transduction;GO:0050905//neuromuscular process	gi|297702070|ref|XP_002828022.1|/1.67081e-106/1
COL4A3	1285	8114	0.441435	1.27677	1.53222	Up	3.6214e-08	1.48887e-07	collagen, type IV, alpha 3 (Goodpasture antigen)	K06237	GO:0005576//extracellular region	-	GO:0032501//multicellular organismal process;GO:0050794//regulation of cellular process	gi|62988864|gb|AAY24251.1|/0/1
VAV2	7410	4865	18.1529	52.4026	1.52944	Up	1.56064e-165	1.20679e-163	vav 2 guanine nucleotide exchange factor	K05730	GO:0016020//membrane;GO:0044444//cytoplasmic part	GO:0005088//Ras guanyl-nucleotide exchange factor activity;GO:0043169//cation binding;GO:0070851//growth factor receptor binding	GO:0001775//cell activation;GO:0006917//induction of apoptosis;GO:0006935//chemotaxis;GO:0007169//transmembrane receptor protein tyrosine kinase signaling pathway;GO:0007266//Rho protein signal transduction;GO:0007599//hemostasis;GO:0009966//regulation of signal transduction;GO:0030031//cell projection assembly;GO:0043551//regulation of phosphatidylinositol 3-kinase activity;GO:0048646//anatomica…	gi|40549448|ref|NP_003362.2|/0/1
THBS3	7059	3251	1.72149	4.91848	1.51455	Up	1.06696e-11	5.66442e-11	thrombospondin 3	K04659	GO:0044444//cytoplasmic part	GO:0005539//glycosaminoglycan binding;GO:0046872//metal ion binding	GO:0001503//ossification;GO:0003416//endochondral bone growth;GO:0031589//cell-substrate adhesion;GO:0060343	gi|6005902|ref|NP_009043.1|/0/1
VEGFC	7424	2076	1.67142	4.71902	1.49741	Up	1.4013e-07	5.46515e-07	vascular endothelial growth factor C	K05449	GO:0031091//platelet alpha granule;GO:0044421//extracellular region part	GO:0005172//vascular endothelial growth factor receptor binding	GO:0001775//cell activation;GO:0001934//positive regulation of protein phosphorylation;GO:0002009//morphogenesis of an epithelium;GO:0002690//positive regulation of leukocyte chemotaxis;GO:0006887//exocytosis;GO:0007169//transmembrane receptor protein tyrosine kinase signaling pathway;GO:0007405//neuroblast proliferation;GO:0007599//hemostasis;GO:0008217//regulation of blood pressure;GO:0008284//…	gi|441620202|ref|XP_004088647.1|/0/1
JUN	3725	3338	2.582	6.98302	1.43536	Up	2.95854e-15	1.92976e-14	jun proto-oncogene	K04448	GO:0000785//chromatin;GO:0031981//nuclear lumen;GO:0043234//protein complex;GO:0044444//cytoplasmic part	GO:0000981//sequence-specific DNA binding RNA polymerase II transcription factor activity;GO:0003712//transcription cofactor activity;GO:0005099//Ras GTPase activator activity;GO:0030528//transcription regulator activity;GO:0042802//identical protein binding;GO:0043565//sequence-specific DNA binding;GO:0043566//structure-specific DNA binding;GO:0046332//SMAD binding;GO:0046983//protein dimerizati…	GO:0000165//MAPK cascade;GO:0000302//response to reactive oxygen species;GO:0001933//negative regulation of protein phosphorylation;GO:0001935//endothelial cell proliferation;GO:0002224//toll-like receptor signaling pathway;GO:0002237//response to molecule of bacterial origin;GO:0002763//positive regulation of myeloid leukocyte differentiation;GO:0003007//heart morphogenesis;GO:0006275//regulatio…	gi|49456409|emb|CAG46525.1|/3.31753e-132/1
ANKRD36	375248	6269	0.71419	1.92196	1.4282	Up	1.68293e-08	7.09894e-08	ankyrin repeat domain 36	K00907	-	-	-	gi|256222280|ref|NP_001157787.1|/0/1
RALGPS1	9649	6342	0.511828	1.29615	1.34051	Up	9.3158e-06	3.04059e-05	Ral GEF with PH domain and SH3 binding motif 1	K04349;K12326;K03099	GO:0016020//membrane;GO:0044424//intracellular part	GO:0030695//GTPase regulator activity	GO:0035556//intracellular signal transduction	gi|40788221|dbj|BAA20808.2|/7.66115e-162/1
COL4A4	1286	10341	1.19064	2.9292	1.29877	Up	7.45788e-17	5.23602e-16	collagen, type IV, alpha 4	K06237	GO:0005604//basement membrane	GO:0005488//binding	GO:0071842	gi|62822121|gb|AAY14670.1|/0/1
ARHGAP29	9411	9121	1.41126	3.43212	1.28211	Up	4.70848e-17	3.3383e-16	Rho GTPase activating protein 29	K10360;K04450;K02649	GO:0044444//cytoplasmic part	GO:0005099//Ras GTPase activator activity;GO:0043169//cation binding	GO:0007265//Ras protein signal transduction;GO:0009966//regulation of signal transduction	gi|134304853|ref|NP_004806.3|/0/1
COL4A1	1282	6549	12.1178	29.4023	1.2788	Up	4.09522e-96	1.56147e-94	collagen, type IV, alpha 1	K06237	-	-	-	gi|148536825|ref|NP_001836.2|/0/1
MEGF8	1954	11167	2.30538	5.53599	1.26383	Up	1.74984e-31	2.19866e-30	multiple EGF-like-domains 8	K05636;K09434	GO:0031224//intrinsic to membrane	GO:0046872//metal ion binding	-	gi|58801254|dbj|BAA32469.2|/0/1
EHBP1L1	254102	5197	18.1132	42.7281	1.23814	Up	3.42278e-105	1.4267e-103	EH domain binding protein 1-like 1	K05699;K06115	-	-	-	gi|150378549|ref|NP_001092879.1|/0/1
LIMS1	3987	4689	10.0497	22.9101	1.18883	Up	1.03505e-48	1.95972e-47	LIM and senescent cell antigen-like domains 1	K05760	GO:0005924//cell-substrate adherens junction;GO:0032991//macromolecular complex;GO:0044444//cytoplasmic part	GO:0005515//protein binding;GO:0043169//cation binding;GO:0046914//transition metal ion binding	GO:0009792//embryo development ending in birth or egg hatching;GO:0031589//cell-substrate adhesion;GO:0051259//protein oligomerization	gi|441643292|ref|XP_004090506.1|/0/1
RALGPS2	55103	5834	2.09128	4.72889	1.17712	Up	1.764e-13	1.04776e-12	Ral GEF with PH domain and SH3 binding motif 2	K04349	GO:0016020//membrane;GO:0044424//intracellular part	GO:0005488//binding;GO:0030695//GTPase regulator activity	GO:0019222//regulation of metabolic process;GO:0035556//intracellular signal transduction	gi|32441283|ref|NP_689876.2|/0/1
EHBP1	23301	5177	3.0053	6.72109	1.16118	Up	2.71684e-16	1.8717e-15	EH domain binding protein 1	K05699;K06115	GO:0044424//intracellular part	-	-	gi|217330572|ref|NP_001136087.1|/0/1
FLJ42627	645644	7148	1.48762	3.32397	1.15991	Up	1.44103e-11	7.54864e-11	uncharacterized LOC645644	K06276	GO:0016020//membrane;GO:0034399//nuclear periphery;GO:0044444//cytoplasmic part	GO:0000166//nucleotide binding;GO:0004674//protein serine/threonine kinase activity;GO:0005515//protein binding;GO:0016564//transcription repressor activity	GO:0000122//negative regulation of transcription from RNA polymerase II promoter;GO:0006950//response to stress;GO:0007010//cytoskeleton organization;GO:0007169//transmembrane receptor protein tyrosine kinase signaling pathway;GO:0007267//cell-cell signaling;GO:0007599//hemostasis;GO:0010551;GO:0031294;GO:0032147//activation of protein kinase activity;GO:0032868//response to insulin stimulus;GO:0…	gi|426380847|ref|XP_004057071.1|/2.35002e-42/1
AKAP12	9590	8450	2.79497	6.11668	1.12991	Up	1.60193e-22	1.45653e-21	A kinase (PRKA) anchor protein 12	K00907	GO:0016020//membrane;GO:0043232;GO:0044444//cytoplasmic part	GO:0019899//enzyme binding	GO:0006171//cAMP biosynthetic process;GO:0006886//intracellular protein transport;GO:0007166//cell surface receptor signaling pathway;GO:0010737//protein kinase A signaling cascade	gi|68533061|dbj|BAE06085.1|/0/1
MYL12B	103910	1041	222.142	457.453	1.04214	Up	8.56638e-170	6.78261e-168	myosin, light chain 12B, regulatory	K12757	GO:0015629//actin cytoskeleton;GO:0032991//macromolecular complex;GO:0044444//cytoplasmic part	GO:0017111//nucleoside-triphosphatase activity;GO:0046872//metal ion binding	GO:0003012//muscle system process;GO:0006935//chemotaxis	gi|403269893|ref|XP_003926940.1|/6.88621e-101/1
TNS1	7145	10276	18.3865	0.120539	-7.25301	Down	0	0	tensin 1	K00665;K01110;K08855	GO:0005924//cell-substrate adherens junction;GO:0043232	GO:0008092//cytoskeletal protein binding	-	gi|397495609|ref|XP_003818640.1|/0/1
PIP5K1B	8395	2654	0.590444	0.01	-5.88373	Down	6.38422e-05	0.000189534	phosphatidylinositol-4-phosphate 5-kinase, type I, beta	K00889	GO:0031254//trailing edge	GO:0016307//phosphatidylinositol phosphate kinase activity;GO:0032559	GO:0006796//phosphate-containing compound metabolic process;GO:0046488//phosphatidylinositol metabolic process	gi|4505817|ref|NP_003549.1|/0/1
VIT	5212	2832	5.84952	0.119285	-5.61583	Down	3.1773e-40	4.89553e-39	vitrin	K06560;K06238	GO:0031012//extracellular matrix	-	-	gi|295789113|ref|NP_001171443.1|/1.28572e-110/1
PRG4	10216	5059	0.420379	0.01	-5.39362	Down	2.0252e-06	7.07772e-06	proteoglycan 4	K06251	-	GO:0001871;GO:0004888//transmembrane signaling receptor activity;GO:0005488//binding	GO:0002376//immune system process	gi|67190163|ref|NP_005798.2|/0/1
VTN	7448	1678	2.20127	0.067107	-5.03573	Down	2.31374e-09	1.03986e-08	vitronectin	K06251	GO:0031012//extracellular matrix;GO:0043234//protein complex	GO:0004888//transmembrane signaling receptor activity;GO:0005102//receptor binding;GO:0005539//glycosaminoglycan binding	GO:0001934//positive regulation of protein phosphorylation;GO:0002376//immune system process;GO:0007160//cell-matrix adhesion;GO:0007596//blood coagulation;GO:0009967//positive regulation of signal transduction;GO:0010466//negative regulation of peptidase activity;GO:0010810//regulation of cell-substrate adhesion;GO:0014909//smooth muscle cell migration;GO:0043062//extracellular structure organiz…	gi|88853069|ref|NP_000629.3|/0/1
TENM3	55714	10810	1.72919	0.0729175	-4.56769	Down	6.2342e-41	9.76927e-40	teneurin transmembrane protein 3	K06252	GO:0016021//integral to membrane	-	GO:0023052//signaling	gi|122937400|ref|NP_001073946.1|/0/1
VAV3	10451	4776	12.8665	0.730898	-4.1378	Down	3.34198e-123	1.70163e-121	vav 3 guanine nucleotide exchange factor	K05730	GO:0016020//membrane;GO:0044444//cytoplasmic part	GO:0005089//Rho guanyl-nucleotide exchange factor activity;GO:0008047//enzyme activator activity;GO:0030674//protein binding, bridging;GO:0043169//cation binding;GO:0070851//growth factor receptor binding	GO:0006917//induction of apoptosis;GO:0007169//transmembrane receptor protein tyrosine kinase signaling pathway;GO:0007266//Rho protein signal transduction;GO:0007599//hemostasis;GO:0009966//regulation of signal transduction;GO:0016192//vesicle-mediated transport;GO:0030031//cell projection assembly;GO:0030155//regulation of cell adhesion;GO:0030888//regulation of B cell proliferation;GO:0033124/…	gi|120432044|ref|NP_006104.4|/0/1
CHN1	1123	2523	6.16665	0.446316	-3.78835	Down	2.60396e-30	3.13612e-29	chimerin 1	K10360;K13736;K04450;K02649	GO:0044444//cytoplasmic part	GO:0008047//enzyme activator activity;GO:0030674//protein binding, bridging;GO:0043169//cation binding	GO:0009966//regulation of signal transduction;GO:0035556//intracellular signal transduction;GO:0043087//regulation of GTPase activity	gi|62089162|dbj|BAD93025.1|/1.09217e-172/1
PRKCB	5579	8014	0.363141	0.0281022	-3.69178	Down	1.75134e-06	6.1636e-06	protein kinase C, beta	K02677	GO:0005626//insoluble fraction;GO:0005815//microtubule organizing center;GO:0005903//brush border;GO:0016020//membrane;GO:0043231//intracellular membrane-bounded organelle;GO:0044444//cytoplasmic part	GO:0003713//transcription coactivator activity;GO:0016247//channel regulator activity;GO:0019901//protein kinase binding;GO:0032559;GO:0035184//histone threonine kinase activity;GO:0035258//steroid hormone receptor binding;GO:0046914//transition metal ion binding	GO:0006875//cellular metal ion homeostasis;GO:0007249//I-kappaB kinase/NF-kappaB cascade;GO:0007267//cell-cell signaling;GO:0007599//hemostasis;GO:0010551;GO:0010646//regulation of cell communication;GO:0012501//programmed cell death;GO:0015031//protein transport;GO:0035405;GO:0042221//response to chemical stimulus;GO:0046649//lymphocyte activation;GO:0050851//antigen receptor-mediated signaling …	gi|47157322|ref|NP_997700.1|/0/1
PIK3R1	5295	6991	0.736496	0.0644288	-3.5149	Down	2.75006e-10	1.32445e-09	phosphoinositide-3-kinase, regulatory subunit 1 (alpha)	K02649	GO:0005624//membrane fraction;GO:0005942//phosphatidylinositol 3-kinase complex;GO:0016020//membrane;GO:0043231//intracellular membrane-bounded organelle	GO:0017046//peptide hormone binding;GO:0019900//kinase binding;GO:0019902//phosphatase binding;GO:0035004//phosphatidylinositol 3-kinase activity;GO:0035014//phosphatidylinositol 3-kinase regulator activity;GO:0035091//phosphatidylinositol binding;GO:0035258//steroid hormone receptor binding;GO:0070851//growth factor receptor binding	GO:0001101//response to acid;GO:0001932//regulation of protein phosphorylation;GO:0001952//regulation of cell-matrix adhesion;GO:0002027//regulation of heart rate;GO:0002762//negative regulation of myeloid leukocyte differentiation;GO:0006357//regulation of transcription from RNA polymerase II promoter;GO:0007162//negative regulation of cell adhesion;GO:0007169//transmembrane receptor protein tyr…	gi|32455252|ref|NP_852556.2|/0/1
PDGFRB	5159	5718	3.54312	0.315091	-3.49118	Down	1.28386e-36	1.81274e-35	platelet-derived growth factor receptor, beta polypeptide	K05089	GO:0016021//integral to membrane	GO:0004930//G-protein coupled receptor activity;GO:0005017//platelet-derived growth factor-activated receptor activity;GO:0019838//growth factor binding;GO:0032559;GO:0070851//growth factor receptor binding	GO:0001932//regulation of protein phosphorylation;GO:0006935//chemotaxis;GO:0007169//transmembrane receptor protein tyrosine kinase signaling pathway;GO:0008283//cell proliferation;GO:0009887//organ morphogenesis;GO:0016477//cell migration;GO:0035270//endocrine system development;GO:0043009//chordate embryonic development;GO:0048871//multicellular organismal homeostasis;GO:0060537//muscle tissue …	gi|4505683|ref|NP_002600.1|/0/1
EGFR	1956	5616	349.686	47.8413	-2.86973	Down	0	0	epidermal growth factor receptor	K04361	GO:0005635//nuclear envelope;GO:0030128//clathrin coat of endocytic vesicle;GO:0031224//intrinsic to membrane;GO:0044421//extracellular region part;GO:0044459//plasma membrane part	GO:0003779//actin binding;GO:0004709//MAP kinase kinase kinase activity;GO:0004714//transmembrane receptor protein tyrosine kinase activity;GO:0019902//phosphatase binding;GO:0030234//enzyme regulator activity;GO:0032559;GO:0043566//structure-specific DNA binding;GO:0046983//protein dimerization activity	GO:0006915//apoptotic process;GO:0006935//chemotaxis;GO:0007155//cell adhesion;GO:0007173//epidermal growth factor receptor signaling pathway;GO:0008284//positive regulation of cell proliferation;GO:0009411//response to UV;GO:0010740//positive regulation of intracellular protein kinase cascade;GO:0010863//positive regulation of phospholipase C activity;GO:0016477//cell migration;GO:0019722//calci…	gi|41327736|ref|NP_958441.1|/0/1
LDB3	11155	5436	0.432406	0.0621443	-2.79869	Down	0.000165825	0.000468032	LIM domain binding 3	K01104;K05760;K08202	GO:0030016//myofibril;GO:0031674//I band;GO:0042995//cell projection;GO:0043232;GO:0044444//cytoplasmic part	GO:0019901//protein kinase binding;GO:0046872//metal ion binding;GO:0046914//transition metal ion binding	-	gi|45592959|ref|NP_009009.1|/3.52044e-171/1
SPECC1	92521	4992	82.3117	13.8501	-2.5712	Down	0	0	sperm antigen with calponin homology and coiled-coil domains 1	K00939;K05699;K06115;K12478	GO:0043231//intracellular membrane-bounded organelle	-	-	gi|75750474|ref|NP_001028727.1|/0/1
PTEN	5728	5572	16.7535	3.51639	-2.2523	Down	3.21642e-103	1.31746e-101	phosphatase and tensin homolog	K01110	GO:0005624//membrane fraction;GO:0016604//nuclear body;GO:0030425//dendrite;GO:0044444//cytoplasmic part;GO:0044459//plasma membrane part	GO:0004721//phosphoprotein phosphatase activity;GO:0019904//protein domain specific binding;GO:0034593//phosphatidylinositol bisphosphate phosphatase activity;GO:0034594//phosphatidylinositol trisphosphate phosphatase activity;GO:0046872//metal ion binding;GO:0070851//growth factor receptor binding	GO:0001783//B cell apoptotic process;GO:0001932//regulation of protein phosphorylation;GO:0001953//negative regulation of cell-matrix adhesion;GO:0003006//developmental process involved in reproduction;GO:0006470//protein dephosphorylation;GO:0007169//transmembrane receptor protein tyrosine kinase signaling pathway;GO:0007611//learning or memory;GO:0008285//negative regulation of cell proliferati…	gi|441642378|ref|XP_003262607.2|/0/1
PALM	5064	2890	16.383	3.58467	-2.19229	Down	1.67699e-51	3.38838e-50	paralemmin	K06236	GO:0016021//integral to membrane;GO:0031410//cytoplasmic vesicle	GO:0050780//dopamine receptor binding	GO:0006171//cAMP biosynthetic process;GO:0006996//organelle organization;GO:0031280;GO:0033036;GO:0065008	gi|93141031|ref|NP_002570.2|/2.51862e-173/1
SCARF2	91179	3523	0.953148	0.255704	-1.89823	Down	0.00031561	0.000857026	scavenger receptor class F, member 2	K06252	GO:0016020//membrane	GO:0004888//transmembrane signaling receptor activity;GO:0005488//binding	GO:0016337//cell-cell adhesion	gi|33598937|ref|NP_878315.1|/0/1
ITGB8	3696	8787	2.3948	0.66638	-1.84549	Down	2.79854e-19	2.23074e-18	integrin, beta 8	K06591	GO:0005887//integral to plasma membrane	GO:0004871//signal transducer activity;GO:0005488//binding	GO:0001568//blood vessel development;GO:0006672//ceramide metabolic process;GO:0007166//cell surface receptor signaling pathway;GO:0031589//cell-substrate adhesion	gi|4504779|ref|NP_002205.1|/0/1
CAV1	857	3212	48.5431	13.6725	-1.82799	Down	8.75026e-131	4.79468e-129	caveolin 1, caveolae protein, 22kDa	K06278	GO:0005624//membrane fraction;GO:0005924//cell-substrate adherens junction;GO:0012505//endomembrane system;GO:0016021//integral to membrane;GO:0031982//vesicle;GO:0032991//macromolecular complex;GO:0043231//intracellular membrane-bounded organelle;GO:0044444//cytoplasmic part	GO:0000149//SNARE binding;GO:0008047//enzyme activator activity;GO:0019899//enzyme binding;GO:0032934//sterol binding	GO:0000122//negative regulation of transcription from RNA polymerase II promoter;GO:0000165//MAPK cascade;GO:0001765//membrane raft assembly;GO:0001933//negative regulation of protein phosphorylation;GO:0001934//positive regulation of protein phosphorylation;GO:0001935//endothelial cell proliferation;GO:0001959//regulation of cytokine-mediated signaling pathway;GO:0006631//fatty acid metabolic pr…	gi|62089438|dbj|BAD93163.1|/4.69909e-102/1
MET	4233	6695	38.4863	12.2613	-1.65023	Down	2.14502e-186	1.88807e-184	met proto-oncogene (hepatocyte growth factor receptor)	K05099	GO:0005626//insoluble fraction;GO:0016021//integral to membrane;GO:0016323//basolateral plasma membrane	GO:0004714//transmembrane receptor protein tyrosine kinase activity;GO:0032559	GO:0000165//MAPK cascade;GO:0006468//protein phosphorylation;GO:0006935//chemotaxis;GO:0007169//transmembrane receptor protein tyrosine kinase signaling pathway;GO:0007417//central nervous system development;GO:0007610//behavior;GO:0008283//cell proliferation;GO:0014706//striated muscle tissue development;GO:0016477//cell migration;GO:0048513//organ development;GO:0051146//striated muscle cell di…	gi|42741655|ref|NP_000236.2|/0/1
TLN2	83660	11650	4.38118	1.51752	-1.52961	Down	1.60501e-34	2.15233e-33	talin 2	K06271	GO:0005856//cytoskeleton;GO:0005924//cell-substrate adherens junction;GO:0031252//cell leading edge	GO:0005102//receptor binding;GO:0005198//structural molecule activity;GO:0008092//cytoskeletal protein binding	GO:0007010//cytoskeleton organization;GO:0034329//cell junction assembly	gi|156938343|ref|NP_055874.2|/0/1
LRRFIP1	9208	4510	19.5818	7.39051	-1.40577	Down	8.84098e-52	1.79951e-50	leucine rich repeat (in FLII) interacting protein 1	K10352;K04514;K11447;K01539;K00939;K11499;K00591	GO:0043231//intracellular membrane-bounded organelle;GO:0043232	GO:0003676//nucleic acid binding;GO:0003723//RNA binding;GO:0030528//transcription regulator activity	GO:0006351//transcription, DNA-dependent;GO:0006355//regulation of transcription, DNA-dependent	gi|212276104|ref|NP_001131025.1|/0/1
IGF1R	3480	11242	12.5452	4.858	-1.3687	Down	1.88012e-78	5.81536e-77	insulin-like growth factor 1 receptor	K05087	GO:0016021//integral to membrane;GO:0042598;GO:0042995//cell projection;GO:0044459//plasma membrane part	GO:0004714//transmembrane receptor protein tyrosine kinase activity;GO:0005102//receptor binding;GO:0005520//insulin-like growth factor binding;GO:0017046//peptide hormone binding;GO:0019900//kinase binding;GO:0032559;GO:0043169//cation binding	GO:0000910//cytokinesis;GO:0002009//morphogenesis of an epithelium;GO:0002376//immune system process;GO:0006275//regulation of DNA replication;GO:0006468//protein phosphorylation;GO:0007163//establishment or maintenance of cell polarity;GO:0007169//transmembrane receptor protein tyrosine kinase signaling pathway;GO:0007417//central nervous system development;GO:0008283//cell proliferation;GO:0010…	gi|4557665|ref|NP_000866.1|/0/1
COL3A1	1281	5490	1.67183	0.697375	-1.26143	Down	7.875e-06	2.59128e-05	collagen, type III, alpha 1	K06236	GO:0005583//fibrillar collagen	GO:0005102//receptor binding;GO:0005198//structural molecule activity;GO:0019838//growth factor binding	GO:0001775//cell activation;GO:0002683//negative regulation of immune system process;GO:0006464//cellular protein modification process;GO:0006935//chemotaxis;GO:0007178//transmembrane receptor protein serine/threonine kinase signaling pathway;GO:0008544//epidermis development;GO:0009059//macromolecule biosynthetic process;GO:0009611//response to wounding;GO:0009628//response to abiotic stimulus;G…	gi|426338026|ref|XP_004032993.1|/6.26577e-139/1
NEDD9	4739	4990	7.33498	3.18184	-1.20493	Down	5.5034e-18	4.10042e-17	neural precursor cell expressed, developmentally down-regulated 9	K05726	GO:0005924//cell-substrate adherens junction;GO:0015630//microtubule cytoskeleton;GO:0031252//cell leading edge;GO:0043231//intracellular membrane-bounded organelle;GO:0044444//cytoplasmic part	GO:0005488//binding	GO:0000087//M phase of mitotic cell cycle;GO:0007015//actin filament organization;GO:0007166//cell surface receptor signaling pathway	gi|78486553|ref|NP_892011.2|/1.92304e-97/1
LIMS2	55679	2352	5.37766	2.34595	-1.19681	Down	4.64128e-07	1.7209e-06	LIM and senescent cell antigen-like domains 2	K05760	GO:0005924//cell-substrate adherens junction;GO:0043231//intracellular membrane-bounded organelle;GO:0044444//cytoplasmic part	GO:0046914//transition metal ion binding	GO:0034330	gi|40804748|ref|NP_060450.2|/0/1
ARHGAP23	57636	5913	27.2588	11.9785	-1.18627	Down	6.7085e-72	1.91731e-70	Rho GTPase activating protein 23	K08878;K05732;K04450;K07526	GO:0044464//cell part	GO:0008047//enzyme activator activity	GO:0023052//signaling	gi|313661470|ref|NP_001186346.1|/0/1
SSBP4	170463	1817	35.5445	15.9271	-1.15814	Down	8.91258e-29	1.01504e-27	single stranded DNA binding protein 4	K12824;K06236;K12831;K13192;K06831	GO:0043231//intracellular membrane-bounded organelle	GO:0043566//structure-specific DNA binding	-	gi|58218984|ref|NP_001009998.1|/0/1
DIXDC1	85458	5899	4.87648	2.19522	-1.15147	Down	1.49867e-13	8.93374e-13	DIX domain containing 1	K02353;K10366;K05699	GO:0005924//cell-substrate adherens junction;GO:0044424//intracellular part	GO:0008092//cytoskeletal protein binding;GO:0060089	GO:0007166//cell surface receptor signaling pathway;GO:0032501//multicellular organismal process	gi|83816971|ref|NP_001033043.1|/0/1
LAMB2	3913	5817	27.2661	12.4859	-1.12681	Down	2.46136e-65	6.36415e-64	laminin, beta 2 (laminin S)	K06243	GO:0043256//laminin complex	-	GO:0048676	gi|119703755|ref|NP_002283.3|/0/1
CAV2	858	3121	18.183	8.6231	-1.07631	Down	8.0607e-23	7.4602e-22	caveolin 2	K11447;K12958	GO:0005626//insoluble fraction;GO:0009898//internal side of plasma membrane;GO:0012505//endomembrane system;GO:0016021//integral to membrane;GO:0016023//cytoplasmic membrane-bounded vesicle;GO:0032991//macromolecular complex	GO:0000149//SNARE binding;GO:0042802//identical protein binding;GO:0050780//dopamine receptor binding	GO:0001765//membrane raft assembly;GO:0001935//endothelial cell proliferation;GO:0006461//protein complex assembly;GO:0007067//mitosis;GO:0007267//cell-cell signaling;GO:0016192//vesicle-mediated transport;GO:0022406//membrane docking;GO:0045745//positive regulation of G-protein coupled receptor protein signaling pathway;GO:0048747//muscle fiber development	gi|4557413|ref|NP_001224.1|/7.19606e-89/1
ATRN	8455	8658	10.3166	5.07232	-1.02425	Down	2.14454e-32	2.75527e-31	attractin	K14616;K05636;K09434	GO:0016021//integral to membrane;GO:0044421//extracellular region part;GO:0044424//intracellular part	GO:0004871//signal transducer activity;GO:0030246//carbohydrate binding	GO:0006952//defense response;GO:0035264//multicellular organism growth	gi|333440461|ref|NP_001193976.1|/0/1
ITGB5	3693	3392	70.3201	34.7908	-1.01523	Down	2.04684e-82	6.55147e-81	integrin, beta 5	K06588	GO:0005887//integral to plasma membrane;GO:0005924//cell-substrate adherens junction	GO:0004871//signal transducer activity;GO:0005102//receptor binding	GO:0003012//muscle system process;GO:0007166//cell surface receptor signaling pathway;GO:0031589//cell-substrate adhesion	gi|20127446|ref|NP_002204.2|/0/1
TMC5	79838	4917	15.0926	7.53451	-1.00226	Down	2.71246e-26	2.82301e-25	transmembrane channel-like 5	K06237;K11447;K01539;K08857;K00939	GO:0031224//intrinsic to membrane	-	-	gi|31377679|ref|NP_079056.2|/0/1
②ECM-receptor interaction
Symbol	GeneID	Gene_length	shNC-RPKM	shNrf1-RPKM	log2 Ratio(shNrf1/shNC)	Up-Down-Regulation(shNrf1/shNC)	P-value	FDR	Description	KEGG Orthology	GO Component	GO Function	GO Process	Blast nr
SPINK5	11005	3745	0.01	4.90112	8.93697	Up	5.22352e-50	1.01693e-48	serine peptidase inhibitor, Kazal type 5	K06254	GO:0030141//secretory granule;GO:0031090//organelle membrane;GO:0043231//intracellular membrane-bounded organelle;GO:0044444//cytoplasmic part	GO:0004866//endopeptidase inhibitor activity	GO:0001525//angiogenesis;GO:0002682//regulation of immune system process;GO:0002683//negative regulation of immune system process;GO:0009913//epidermal cell differentiation;GO:0022405//hair cycle process;GO:0043062//extracellular structure organization;GO:0045619//regulation of lymphocyte differentiation;GO:0048519//negative regulation of biological process;GO:2000026//regulation of multicellular…	gi|74027261|ref|NP_006837.2|/0/1
ZNF469	84627	13203	0.00847772	3.02772	8.48034	Up	8.3877e-106	3.5318e-104	zinc finger protein 469	K06236	GO:0043231//intracellular membrane-bounded organelle	GO:0003676//nucleic acid binding;GO:0046914//transition metal ion binding	-	gi|188536004|ref|NP_001120936.1|/0/1
MUC13	56667	2899	0.308883	54.2246	7.45575	Up	0	0	mucin 13, cell surface associated	K06588	GO:0031224//intrinsic to membrane	-	-	gi|308736985|ref|NP_149038.3|/0/1
COL25A1	84570	5702	0.0392604	4.62113	6.87903	Up	1.26752e-67	3.39951e-66	collagen, type XXV, alpha 1	K06237;K06236	GO:0005576//extracellular region;GO:0016020//membrane;GO:0044421//extracellular region part	GO:0005488//binding;GO:0005515//protein binding;GO:0005539//glycosaminoglycan binding	-	gi|38570075|ref|NP_942014.1|/0/1
COL5A3	50509	6192	0.01	0.854725	6.41739	Up	6.15054e-15	3.95566e-14	collagen, type V, alpha 3	K06236	-	-	-	gi|296232847|ref|XP_002807839.1|/0/1
ITGA7	3679	4150	0.0269714	1.11249	5.36621	Up	8.84286e-12	4.71733e-11	integrin, alpha 7	K06583	GO:0005887//integral to plasma membrane	GO:0004871//signal transducer activity	GO:0007166//cell surface receptor signaling pathway;GO:0031589//cell-substrate adhesion;GO:0048513//organ development;GO:0065008	gi|68533127|dbj|BAE06118.1|/0/1
C19orf57	79173	2420	0.508779	8.46868	4.05703	Up	1.38763e-41	2.22074e-40	chromosome 19 open reading frame 57	K06236	-	-	-	gi|31543148|ref|NP_077299.3|/0/1
COL6A1	1291	4246	1.63442	24.3192	3.89524	Up	2.02192e-197	1.85882e-195	collagen, type VI, alpha 1	K06238	GO:0005886//plasma membrane;GO:0030934	GO:0019838//growth factor binding	GO:0006935//chemotaxis;GO:0009987//cellular process	gi|87196339|ref|NP_001839.2|/0/1
EGFL7	51162	2141	2.3526	14.8317	2.65636	Up	1.22549e-43	2.07144e-42	EGF-like-domain, multiple 7	K06824	GO:0044421//extracellular region part	GO:0046872//metal ion binding	GO:0001944//vasculature development;GO:0016477//cell migration;GO:0030154//cell differentiation;GO:0048646//anatomical structure formation involved in morphogenesis	gi|7705889|ref|NP_057299.1|/5.75706e-156/1
ANTXR2	118429	8058	0.416721	2.62718	2.65636	Up	1.33892e-29	1.5725e-28	anthrax toxin receptor 2	K06238	GO:0031090//organelle membrane;GO:0031224//intrinsic to membrane;GO:0043231//intracellular membrane-bounded organelle	GO:0004871//signal transducer activity;GO:0043169//cation binding	-	gi|62089412|dbj|BAD93150.1|/0/1
PEAR1	375033	4866	0.437052	1.68931	1.95056	Up	6.53044e-09	2.84234e-08	platelet endothelial aggregation receptor 1	K06252	GO:0031224//intrinsic to membrane	-	-	gi|122937343|ref|NP_001073940.1|/0/1
THBS1	7057	5820	6.46202	21.8633	1.75845	Up	1.07907e-101	4.38732e-100	thrombospondin 1	K04659	GO:0005615//extracellular space;GO:0009986//cell surface;GO:0031091//platelet alpha granule	GO:0001948//glycoprotein binding;GO:0005102//receptor binding;GO:0005518//collagen binding;GO:0005539//glycosaminoglycan binding;GO:0005543//phospholipid binding;GO:0017134//fibroblast growth factor binding;GO:0032403//protein complex binding;GO:0043498//cell surface binding;GO:0046872//metal ion binding;GO:0071813//lipoprotein particle binding	GO:0000165//MAPK cascade;GO:0001818//negative regulation of cytokine production;GO:0001935//endothelial cell proliferation;GO:0001953//negative regulation of cell-matrix adhesion;GO:0002468;GO:0002504//antigen processing and presentation of peptide or polysaccharide antigen via MHC class II;GO:0002690//positive regulation of leukocyte chemotaxis;GO:0002696//positive regulation of leukocyte activa…	gi|62089410|dbj|BAD93149.1|/0/1
COL4A3	1285	8114	0.441435	1.27677	1.53222	Up	3.6214e-08	1.48887e-07	collagen, type IV, alpha 3 (Goodpasture antigen)	K06237	GO:0005576//extracellular region	-	GO:0032501//multicellular organismal process;GO:0050794//regulation of cellular process	gi|62988864|gb|AAY24251.1|/0/1
THBS3	7059	3251	1.72149	4.91848	1.51455	Up	1.06696e-11	5.66442e-11	thrombospondin 3	K04659	GO:0044444//cytoplasmic part	GO:0005539//glycosaminoglycan binding;GO:0046872//metal ion binding	GO:0001503//ossification;GO:0003416//endochondral bone growth;GO:0031589//cell-substrate adhesion;GO:0060343	gi|6005902|ref|NP_009043.1|/0/1
COL4A4	1286	10341	1.19064	2.9292	1.29877	Up	7.45788e-17	5.23602e-16	collagen, type IV, alpha 4	K06237	GO:0005604//basement membrane	GO:0005488//binding	GO:0071842	gi|62822121|gb|AAY14670.1|/0/1
COL4A1	1282	6549	12.1178	29.4023	1.2788	Up	4.09522e-96	1.56147e-94	collagen, type IV, alpha 1	K06237	-	-	-	gi|148536825|ref|NP_001836.2|/0/1
MEGF8	1954	11167	2.30538	5.53599	1.26383	Up	1.74984e-31	2.19866e-30	multiple EGF-like-domains 8	K05636;K09434	GO:0031224//intrinsic to membrane	GO:0046872//metal ion binding	-	gi|58801254|dbj|BAA32469.2|/0/1
HMMR	3161	3144	3.31095	7.48554	1.17686	Up	1.0478e-11	5.56987e-11	hyaluronan-mediated motility receptor (RHAMM)	K06267	GO:0044424//intracellular part	GO:0005539//glycosaminoglycan binding	-	gi|397479279|ref|XP_003810952.1|/0/1
SDC3	9672	5121	5.44247	12.2259	1.1676	Up	2.59816e-28	2.90699e-27	syndecan 3	K06257	GO:0044464//cell part	-	-	gi|187960059|ref|NP_055469.3|/2.72031e-120/1
AGRN	375790	7343	24.8465	54.0101	1.12019	Up	3.68668e-159	2.74807e-157	agrin	K06254	GO:0005604//basement membrane;GO:0044464//cell part	GO:0005198//structural molecule activity;GO:0005515//protein binding;GO:0030545	GO:0006357//regulation of transcription from RNA polymerase II promoter;GO:0006935//chemotaxis;GO:0007172//signal complex assembly;GO:0007186//G-protein coupled receptor signaling pathway;GO:0043062//extracellular structure organization;GO:0043112//receptor metabolic process;GO:0045161//neuronal ion channel clustering;GO:0048638//regulation of developmental growth;GO:0048741//skeletal muscle fibe…	gi|460018339|sp|O00468.5|AGRIN_HUMAN/0/1
VIT	5212	2832	5.84952	0.119285	-5.61583	Down	3.1773e-40	4.89553e-39	vitrin	K06560;K06238	GO:0031012//extracellular matrix	-	-	gi|295789113|ref|NP_001171443.1|/1.28572e-110/1
PRG4	10216	5059	0.420379	0.01	-5.39362	Down	2.0252e-06	7.07772e-06	proteoglycan 4	K06251	-	GO:0001871;GO:0004888//transmembrane signaling receptor activity;GO:0005488//binding	GO:0002376//immune system process	gi|67190163|ref|NP_005798.2|/0/1
VTN	7448	1678	2.20127	0.067107	-5.03573	Down	2.31374e-09	1.03986e-08	vitronectin	K06251	GO:0031012//extracellular matrix;GO:0043234//protein complex	GO:0004888//transmembrane signaling receptor activity;GO:0005102//receptor binding;GO:0005539//glycosaminoglycan binding	GO:0001934//positive regulation of protein phosphorylation;GO:0002376//immune system process;GO:0007160//cell-matrix adhesion;GO:0007596//blood coagulation;GO:0009967//positive regulation of signal transduction;GO:0010466//negative regulation of peptidase activity;GO:0010810//regulation of cell-substrate adhesion;GO:0014909//smooth muscle cell migration;GO:0043062//extracellular structure organiz…	gi|88853069|ref|NP_000629.3|/0/1
TENM3	55714	10810	1.72919	0.0729175	-4.56769	Down	6.2342e-41	9.76927e-40	teneurin transmembrane protein 3	K06252	GO:0016021//integral to membrane	-	GO:0023052//signaling	gi|122937400|ref|NP_001073946.1|/0/1
SUSD5	26032	5005	0.91692	0.0899944	-3.34889	Down	5.71866e-09	2.4969e-08	sushi domain containing 5	K11447;K06264;K01539;K00939	GO:0031224//intrinsic to membrane	GO:0005539//glycosaminoglycan binding	GO:0009987//cellular process	gi|3043578|dbj|BAA25453.1|/0/1
LOC729732	729732	3982	4.55371	0.62213	-2.87176	Down	1.31461e-27	1.43214e-26	uncharacterized LOC729732	K14693;K11447;K06264;K00939	-	-	-	gi|410172339|ref|XP_003960477.1|/1.20748e-35/1
SV2B	9899	11361	0.275863	0.0396463	-2.79869	Down	1.17887e-05	3.80122e-05	synaptic vesicle glycoprotein 2B	K06258	GO:0008021//synaptic vesicle;GO:0030141//secretory granule;GO:0031224//intrinsic to membrane;GO:0044459//plasma membrane part	GO:0004871//signal transducer activity;GO:0005215//transporter activity	GO:0006810//transport;GO:0060255	gi|7662270|ref|NP_055663.1|/0/1
SDC2	6383	3485	10.5668	1.74482	-2.59839	Down	4.29912e-49	8.21499e-48	syndecan 2	K06257	GO:0016021//integral to membrane;GO:0044297//cell body	GO:0019904//protein domain specific binding	GO:0009611//response to wounding;GO:0014074//response to purine-containing compound;GO:0048812//neuron projection morphogenesis	gi|386787|gb|AAA52701.1|/3.23631e-146/1
PALM	5064	2890	16.383	3.58467	-2.19229	Down	1.67699e-51	3.38838e-50	paralemmin	K06236	GO:0016021//integral to membrane;GO:0031410//cytoplasmic vesicle	GO:0050780//dopamine receptor binding	GO:0006171//cAMP biosynthetic process;GO:0006996//organelle organization;GO:0031280;GO:0033036;GO:0065008	gi|93141031|ref|NP_002570.2|/2.51862e-173/1
SCARF2	91179	3523	0.953148	0.255704	-1.89823	Down	0.00031561	0.000857026	scavenger receptor class F, member 2	K06252	GO:0016020//membrane	GO:0004888//transmembrane signaling receptor activity;GO:0005488//binding	GO:0016337//cell-cell adhesion	gi|33598937|ref|NP_878315.1|/0/1
ITGB8	3696	8787	2.3948	0.66638	-1.84549	Down	2.79854e-19	2.23074e-18	integrin, beta 8	K06591	GO:0005887//integral to plasma membrane	GO:0004871//signal transducer activity;GO:0005488//binding	GO:0001568//blood vessel development;GO:0006672//ceramide metabolic process;GO:0007166//cell surface receptor signaling pathway;GO:0031589//cell-substrate adhesion	gi|4504779|ref|NP_002205.1|/0/1
TPBG	7162	3392	11.2525	3.48572	-1.69072	Down	4.8009e-30	5.71138e-29	trophoblast glycoprotein	K06839;K06260;K06850	GO:0016021//integral to membrane;GO:0043231//intracellular membrane-bounded organelle	-	GO:0009987//cellular process	gi|397491021|ref|XP_003816479.1|/0/1
NPNT	255743	4682	70.4293	25.4457	-1.46876	Down	5.42706e-201	5.07384e-199	nephronectin	K06824	GO:0005576//extracellular region;GO:0005578//proteinaceous extracellular matrix;GO:0044464//cell part	GO:0005102//receptor binding;GO:0046872//metal ion binding	GO:0007179//transforming growth factor beta receptor signaling pathway;GO:0009987//cellular process;GO:0010810//regulation of cell-substrate adhesion;GO:0032502//developmental process;GO:0043062//extracellular structure organization;GO:0048754//branching morphogenesis of an epithelial tube;GO:0048869//cellular developmental process	gi|75709198|ref|NP_001028219.1|/0/1
SDC1	6382	3309	18.706	7.04422	-1.40899	Down	6.4049e-37	9.0899e-36	syndecan 1	K06257	GO:0005924//cell-substrate adherens junction;GO:0016021//integral to membrane;GO:0031254//trailing edge;GO:0032991//macromolecular complex;GO:0044424//intracellular part	GO:0005515//protein binding	GO:0000302//response to reactive oxygen species;GO:0003006//developmental process involved in reproduction;GO:0009611//response to wounding;GO:0009887//organ morphogenesis;GO:0010038//response to metal ion;GO:0016055//Wnt receptor signaling pathway;GO:0031960//response to corticosteroid stimulus;GO:0035295//tube development;GO:0044238//primary metabolic process;GO:0044260;GO:0055001//muscle cell …	gi|229463011|sp|P18827.3|SDC1_HUMAN/5.6134e-124/1
COL3A1	1281	5490	1.67183	0.697375	-1.26143	Down	7.875e-06	2.59128e-05	collagen, type III, alpha 1	K06236	GO:0005583//fibrillar collagen	GO:0005102//receptor binding;GO:0005198//structural molecule activity;GO:0019838//growth factor binding	GO:0001775//cell activation;GO:0002683//negative regulation of immune system process;GO:0006464//cellular protein modification process;GO:0006935//chemotaxis;GO:0007178//transmembrane receptor protein serine/threonine kinase signaling pathway;GO:0008544//epidermis development;GO:0009059//macromolecule biosynthetic process;GO:0009611//response to wounding;GO:0009628//response to abiotic stimulus;G…	gi|426338026|ref|XP_004032993.1|/6.26577e-139/1
FSTL1	11167	3840	81.5	35.2185	-1.21047	Down	3.00308e-142	1.86823e-140	follistatin-like 1	K04661;K06254	GO:0044421//extracellular region part	GO:0005539//glycosaminoglycan binding;GO:0046872//metal ion binding	GO:0007178//transmembrane receptor protein serine/threonine kinase signaling pathway	gi|149060525|gb|EDM11239.1|/3.26756e-164/1
SSBP4	170463	1817	35.5445	15.9271	-1.15814	Down	8.91258e-29	1.01504e-27	single stranded DNA binding protein 4	K12824;K06236;K12831;K13192;K06831	GO:0043231//intracellular membrane-bounded organelle	GO:0043566//structure-specific DNA binding	-	gi|58218984|ref|NP_001009998.1|/0/1
LAMB2	3913	5817	27.2661	12.4859	-1.12681	Down	2.46136e-65	6.36415e-64	laminin, beta 2 (laminin S)	K06243	GO:0043256//laminin complex	-	GO:0048676	gi|119703755|ref|NP_002283.3|/0/1
CCDC77	84318	2386	8.96014	4.34187	-1.0452	Down	3.98214e-09	1.75818e-08	coiled-coil domain containing 77	K10395;K06267;K15208	-	-	-	gi|14150165|ref|NP_115734.1|/0/1
ATRN	8455	8658	10.3166	5.07232	-1.02425	Down	2.14454e-32	2.75527e-31	attractin	K14616;K05636;K09434	GO:0016021//integral to membrane;GO:0044421//extracellular region part;GO:0044424//intracellular part	GO:0004871//signal transducer activity;GO:0030246//carbohydrate binding	GO:0006952//defense response;GO:0035264//multicellular organism growth	gi|333440461|ref|NP_001193976.1|/0/1
ITGB5	3693	3392	70.3201	34.7908	-1.01523	Down	2.04684e-82	6.55147e-81	integrin, beta 5	K06588	GO:0005887//integral to plasma membrane;GO:0005924//cell-substrate adherens junction	GO:0004871//signal transducer activity;GO:0005102//receptor binding	GO:0003012//muscle system process;GO:0007166//cell surface receptor signaling pathway;GO:0031589//cell-substrate adhesion	gi|20127446|ref|NP_002204.2|/0/1
TMC5	79838	4917	15.0926	7.53451	-1.00226	Down	2.71246e-26	2.82301e-25	transmembrane channel-like 5	K06237;K11447;K01539;K08857;K00939	GO:0031224//intrinsic to membrane	-	-	gi|31377679|ref|NP_079056.2|/0/1
③Pathways in cancer
Symbol	GeneID	Gene_length	shNC-RPKM	shNrf1-RPKM	log2 Ratio(shNrf1/shNC)	Up-Down-Regulation(shNrf1/shNC)	P-value	FDR	Description	KEGG Orthology	GO Component	GO Function	GO Process	Blast nr
FZD10	11211	3288	0.170212	41.3024	7.92275	Up	0	0	frizzled family receptor 10	K02842	GO:0016021//integral to membrane;GO:0044424//intracellular part	GO:0004888//transmembrane signaling receptor activity;GO:0019904//protein domain specific binding	GO:0006357//regulation of transcription from RNA polymerase II promoter;GO:0007417//central nervous system development;GO:0016055//Wnt receptor signaling pathway;GO:0030036//actin cytoskeleton organization;GO:0030154//cell differentiation;GO:0032321//positive regulation of Rho GTPase activity;GO:0032526//response to retinoic acid;GO:0043406//positive regulation of MAP kinase activity;GO:0045137//…	gi|6005762|ref|NP_009128.1|/0/1
ARHGEF33	100271715	4316	0.01	1.74805	7.4496	Up	5.52328e-21	4.72836e-20	Rho guanine nucleotide exchange factor (GEF) 33	K08878;K11499;K05723	-	-	-	gi|290463441|ref|NP_001138923.2|/0/1
COL25A1	84570	5702	0.0392604	4.62113	6.87903	Up	1.26752e-67	3.39951e-66	collagen, type XXV, alpha 1	K06237;K06236	GO:0005576//extracellular region;GO:0016020//membrane;GO:0044421//extracellular region part	GO:0005488//binding;GO:0005515//protein binding;GO:0005539//glycosaminoglycan binding	-	gi|38570075|ref|NP_942014.1|/0/1
CBFA2T3	863	4372	0.01	1.03024	6.68684	Up	8.04014e-13	4.60056e-12	core-binding factor, runt domain, alpha subunit 2; translocated to, 3	K10053	GO:0012505//endomembrane system;GO:0031981//nuclear lumen	GO:0001071//nucleic acid binding transcription factor activity;GO:0046914//transition metal ion binding	GO:0002573//myeloid leukocyte differentiation;GO:0006351//transcription, DNA-dependent	gi|402909312|ref|XP_003917366.1|/0/1
MMP9	4318	2387	0.01	0.566094	5.82297	Up	0.000234782	0.00064926	matrix metallopeptidase 9 (gelatinase B, 92kDa gelatinase, 92kDa type IV collagenase)	K01403	GO:0031012//extracellular matrix	GO:0004175//endopeptidase activity;GO:0005515//protein binding;GO:0046914//transition metal ion binding	GO:0002573//myeloid leukocyte differentiation;GO:0006915//apoptotic process;GO:0019538//protein metabolic process;GO:0030335//positive regulation of cell migration;GO:0032963//collagen metabolic process;GO:0043062//extracellular structure organization	gi|74272287|ref|NP_004985.2|/0/1
AR	367	10661	0.01	0.232372	4.53837	Up	2.22488e-07	8.5324e-07	androgen receptor	K08557	GO:0000785//chromatin;GO:0031981//nuclear lumen;GO:0043005//neuron projection	GO:0001071//nucleic acid binding transcription factor activity;GO:0003704//specific RNA polymerase II transcription factor activity;GO:0003707//steroid hormone receptor activity;GO:0003824//catalytic activity;GO:0005496//steroid binding;GO:0019904//protein domain specific binding;GO:0035258//steroid hormone receptor binding;GO:0043565//sequence-specific DNA binding;GO:0046914//transition metal io…	GO:0001655//urogenital system development;GO:0003156//regulation of organ formation;GO:0006359//regulation of transcription from RNA polymerase III promoter;GO:0008285//negative regulation of cell proliferation;GO:0008406//gonad development;GO:0009755//hormone-mediated signaling pathway;GO:0010551;GO:0010740//positive regulation of intracellular protein kinase cascade;GO:0018993//somatic sex dete…	gi|58535455|ref|NP_001011645.1|/0/1
BIRC7	79444	1322	0.254005	4.17373	4.03841	Up	4.79036e-12	2.59734e-11	baculoviral IAP repeat containing 7	K16061	GO:0043231//intracellular membrane-bounded organelle	GO:0005515//protein binding;GO:0046914//transition metal ion binding	GO:0000187//activation of MAPK activity;GO:0000737//DNA catabolic process, endonucleolytic;GO:0043066//negative regulation of apoptotic process	gi|21536421|ref|NP_647478.1|/6.44549e-162/1
PDGFA	5154	2809	2.23146	26.9387	3.59362	Up	3.98906e-136	2.33254e-134	platelet-derived growth factor alpha polypeptide	K04359	GO:0012505//endomembrane system;GO:0031091//platelet alpha granule;GO:0042995//cell projection;GO:0044421//extracellular region part;GO:0044432//endoplasmic reticulum part	GO:0019838//growth factor binding;GO:0042802//identical protein binding;GO:0043498//cell surface binding;GO:0046983//protein dimerization activity;GO:0070851//growth factor receptor binding	GO:0001934//positive regulation of protein phosphorylation;GO:0006275//regulation of DNA replication;GO:0006661//phosphatidylinositol biosynthetic process;GO:0006887//exocytosis;GO:0006935//chemotaxis;GO:0007169//transmembrane receptor protein tyrosine kinase signaling pathway;GO:0007178//transmembrane receptor protein serine/threonine kinase signaling pathway;GO:0008284//positive regulation of c…	gi|77695917|ref|NP_002598.4|/3.38198e-98/1
KANK4	163782	5477	0.0408732	0.472873	3.53222	Up	9.81412e-06	3.19567e-05	KN motif and ankyrin repeat domains 4	K11447;K08803;K00939	-	-	-	gi|156104862|ref|NP_859063.3|/0/1
MECOM	2122	5740	0.741009	8.18057	3.46464	Up	1.61948e-82	5.20373e-81	MDS1 and EVI1 complex locus	K04462	GO:0016585//chromatin remodeling complex;GO:0016604//nuclear body	GO:0001071//nucleic acid binding transcription factor activity;GO:0003676//nucleic acid binding;GO:0042802//identical protein binding;GO:0046914//transition metal ion binding	GO:0002262//myeloid cell homeostasis;GO:0006357//regulation of transcription from RNA polymerase II promoter;GO:0006952//defense response;GO:0007049//cell cycle;GO:0007179//transforming growth factor beta receptor signaling pathway;GO:0007420//brain development;GO:0008283//cell proliferation;GO:0012501//programmed cell death;GO:0030326//embryonic limb morphogenesis;GO:0043009//chordate embryonic …	gi|545408|gb|AAB29907.1|/0/1
PTGS2	5743	4507	0.64571	5.44664	3.07641	Up	1.84506e-39	2.8011e-38	prostaglandin-endoperoxide synthase 2 (prostaglandin G/H synthase and cyclooxygenase)	K11987	GO:0031090//organelle membrane;GO:0032991//macromolecular complex;GO:0042598;GO:0042995//cell projection;GO:0044432//endoplasmic reticulum part;GO:0044459//plasma membrane part	GO:0005506//iron ion binding;GO:0005515//protein binding;GO:0016209//antioxidant activity;GO:0016701//oxidoreductase activity, acting on single donors with incorporation of molecular oxygen;GO:0016705//oxidoreductase activity, acting on paired donors, with incorporation or reduction of molecular oxygen	GO:0001503//ossification;GO:0001516//prostaglandin biosynthetic process;GO:0001660//fever generation;GO:0001819//positive regulation of cytokine production;GO:0001963//synaptic transmission, dopaminergic;GO:0002042//cell migration involved in sprouting angiogenesis;GO:0002237//response to molecule of bacterial origin;GO:0003006//developmental process involved in reproduction;GO:0006915//apoptotic…	gi|4506265|ref|NP_000954.1|/0/1
FGFR1	2260	5963	0.938549	6.13731	2.7091	Up	4.16204e-51	8.32811e-50	fibroblast growth factor receptor 1	K04362	GO:0005626//insoluble fraction;GO:0016021//integral to membrane	GO:0004714//transmembrane receptor protein tyrosine kinase activity;GO:0005539//glycosaminoglycan binding;GO:0019838//growth factor binding;GO:0032559;GO:0042802//identical protein binding	GO:0003156//regulation of organ formation;GO:0006464//cellular protein modification process;GO:0006915//apoptotic process;GO:0006935//chemotaxis;GO:0007243//intracellular protein kinase cascade;GO:0007420//brain development;GO:0007431//salivary gland development;GO:0008284//positive regulation of cell proliferation;GO:0008543//fibroblast growth factor receptor signaling pathway;GO:0010467//gene e…	gi|62087418|dbj|BAD92156.1|/0/1
GSTA4	2941	1352	1.90416	8.91182	2.22657	Up	1.77456e-14	1.11275e-13	glutathione S-transferase alpha 4	K00799	GO:0044444//cytoplasmic part	GO:0016765//transferase activity, transferring alkyl or aryl (other than methyl) groups;GO:0042802//identical protein binding	GO:0006790//sulfur compound metabolic process	gi|4504173|ref|NP_001503.1|/7.95601e-123/1
PAX8	7849	4065	0.220283	1.02495	2.21812	Up	8.4375e-06	2.76537e-05	paired box 8	K09293	GO:0031981//nuclear lumen;GO:0043234//protein complex	GO:0001071//nucleic acid binding transcription factor activity;GO:0003677//DNA binding;GO:0016500//protein-hormone receptor activity;GO:0030528//transcription regulator activity	GO:0001822//kidney development;GO:0006357//regulation of transcription from RNA polymerase II promoter;GO:0009653//anatomical structure morphogenesis;GO:0035270//endocrine system development;GO:0048869//cellular developmental process	gi|7669542|ref|NP_054698.1|/2.28221e-150/1
APC2	10297	10151	0.319772	1.36444	2.0932	Up	2.56774e-15	1.68615e-14	adenomatosis polyposis coli 2	K02085	GO:0005874//microtubule;GO:0012505//endomembrane system;GO:0015629//actin cytoskeleton;GO:0019897//extrinsic to plasma membrane;GO:0030027//lamellipodium;GO:0043231//intracellular membrane-bounded organelle;GO:0044444//cytoplasmic part	GO:0015631//tubulin binding	GO:0030178//negative regulation of Wnt receptor signaling pathway;GO:0035411//catenin import into nucleus	gi|119589902|gb|EAW69496.1|/0/1
GSTM1	2944	1266	23.3411	85.5659	1.87416	Up	1.20355e-94	4.49577e-93	glutathione S-transferase mu 1	K00799	GO:0031090//organelle membrane;GO:0044444//cytoplasmic part	GO:0016765//transferase activity, transferring alkyl or aryl (other than methyl) groups	GO:0006805//xenobiotic metabolic process;GO:0006807//nitrogen compound metabolic process;GO:0044237//cellular metabolic process	gi|23065547|ref|NP_666533.1|/1.59228e-89/1
RAC3	5881	1077	8.41824	28.0207	1.7349	Up	6.07864e-25	6.04867e-24	ras-related C3 botulinum toxin substrate 3 (rho family, small GTP binding protein Rac3)	K07861;K04392	GO:0005884//actin filament;GO:0016020//membrane;GO:0030427//site of polarized growth;GO:0031252//cell leading edge;GO:0042995//cell projection;GO:0044297//cell body;GO:0044444//cytoplasmic part	GO:0017111//nucleoside-triphosphatase activity;GO:0032561//guanyl ribonucleotide binding	GO:0007010//cytoskeleton organization;GO:0009207;GO:0009966//regulation of signal transduction;GO:0030030//cell projection organization;GO:0035556//intracellular signal transduction;GO:0050905//neuromuscular process	gi|297702070|ref|XP_002828022.1|/1.67081e-106/1
NKX3-1	4824	3281	0.921106	2.98588	1.69672	Up	8.24004e-09	3.5565e-08	NK3 homeobox 1	K09348	GO:0043231//intracellular membrane-bounded organelle	GO:0001071//nucleic acid binding transcription factor activity;GO:0003707//steroid hormone receptor activity;GO:0030528//transcription regulator activity;GO:0035258//steroid hormone receptor binding;GO:0043565//sequence-specific DNA binding	GO:0001763//morphogenesis of a branching structure;GO:0007346//regulation of mitotic cell cycle;GO:0009968//negative regulation of signal transduction;GO:0010551;GO:0022612//gland morphogenesis;GO:0030518//intracellular steroid hormone receptor signaling pathway;GO:0030850//prostate gland development;GO:0032091//negative regulation of protein binding;GO:0035272//exocrine system development;GO:004…	gi|373432628|ref|NP_001243268.1|/2.56002e-75/1
CASP3	836	2689	1.95641	6.03019	1.624	Up	5.91442e-13	3.40542e-12	caspase 3, apoptosis-related cysteine peptidase	K02187	GO:0016020//membrane;GO:0031981//nuclear lumen;GO:0044444//cytoplasmic part	GO:0004175//endopeptidase activity;GO:0005488//binding;GO:0016538//cyclin-dependent protein kinase regulator activity	GO:0000079//regulation of cyclin-dependent protein serine/threonine kinase activity;GO:0000737//DNA catabolic process, endonucleolytic;GO:0002260//lymphocyte homeostasis;GO:0006919//activation of cysteine-type endopeptidase activity involved in apoptotic process;GO:0007169//transmembrane receptor protein tyrosine kinase signaling pathway;GO:0008624;GO:0008629;GO:0008637//apoptotic mitochondrial c…	gi|397505966|ref|XP_003823509.1|/5.68245e-166/1
GSTM4	2948	1441	13.7487	42.354	1.62321	Up	1.51205e-44	2.59828e-43	glutathione S-transferase mu 4	K00799	GO:0031090//organelle membrane;GO:0044424//intracellular part;GO:0044444//cytoplasmic part	GO:0016765//transferase activity, transferring alkyl or aryl (other than methyl) groups	GO:0006805//xenobiotic metabolic process;GO:0006807//nitrogen compound metabolic process	gi|4504179|ref|NP_000841.1|/2.43337e-117/1
COL4A3	1285	8114	0.441435	1.27677	1.53222	Up	3.6214e-08	1.48887e-07	collagen, type IV, alpha 3 (Goodpasture antigen)	K06237	GO:0005576//extracellular region	-	GO:0032501//multicellular organismal process;GO:0050794//regulation of cellular process	gi|62988864|gb|AAY24251.1|/0/1
VEGFC	7424	2076	1.67142	4.71902	1.49741	Up	1.4013e-07	5.46515e-07	vascular endothelial growth factor C	K05449	GO:0031091//platelet alpha granule;GO:0044421//extracellular region part	GO:0005172//vascular endothelial growth factor receptor binding	GO:0001775//cell activation;GO:0001934//positive regulation of protein phosphorylation;GO:0002009//morphogenesis of an epithelium;GO:0002690//positive regulation of leukocyte chemotaxis;GO:0006887//exocytosis;GO:0007169//transmembrane receptor protein tyrosine kinase signaling pathway;GO:0007405//neuroblast proliferation;GO:0007599//hemostasis;GO:0008217//regulation of blood pressure;GO:0008284//…	gi|441620202|ref|XP_004088647.1|/0/1
CDK6	1021	11733	4.14985	11.7087	1.49646	Up	2.78984e-87	9.57806e-86	cyclin-dependent kinase 6	K02091	GO:0031252//cell leading edge;GO:0043231//intracellular membrane-bounded organelle;GO:0043234//protein complex;GO:0044444//cytoplasmic part	GO:0004674//protein serine/threonine kinase activity;GO:0005515//protein binding;GO:0032559	GO:0001952//regulation of cell-matrix adhesion;GO:0006464//cellular protein modification process;GO:0006796//phosphate-containing compound metabolic process;GO:0008284//positive regulation of cell proliferation;GO:0008285//negative regulation of cell proliferation;GO:0010467//gene expression;GO:0022008//neurogenesis;GO:0032844//regulation of homeostatic process;GO:0043696;GO:0045596//negative reg…	gi|4502741|ref|NP_001250.1|/0/1
JUN	3725	3338	2.582	6.98302	1.43536	Up	2.95854e-15	1.92976e-14	jun proto-oncogene	K04448	GO:0000785//chromatin;GO:0031981//nuclear lumen;GO:0043234//protein complex;GO:0044444//cytoplasmic part	GO:0000981//sequence-specific DNA binding RNA polymerase II transcription factor activity;GO:0003712//transcription cofactor activity;GO:0005099//Ras GTPase activator activity;GO:0030528//transcription regulator activity;GO:0042802//identical protein binding;GO:0043565//sequence-specific DNA binding;GO:0043566//structure-specific DNA binding;GO:0046332//SMAD binding;GO:0046983//protein dimerizati…	GO:0000165//MAPK cascade;GO:0000302//response to reactive oxygen species;GO:0001933//negative regulation of protein phosphorylation;GO:0001935//endothelial cell proliferation;GO:0002224//toll-like receptor signaling pathway;GO:0002237//response to molecule of bacterial origin;GO:0002763//positive regulation of myeloid leukocyte differentiation;GO:0003007//heart morphogenesis;GO:0006275//regulatio…	gi|49456409|emb|CAG46525.1|/3.31753e-132/1
MAMDC4	158056	3669	0.518625	1.3811	1.41305	Up	0.000307618	0.000836834	MAM domain containing 4	K05119;K03173	GO:0031224//intrinsic to membrane	-	GO:0006810//transport	gi|119220585|ref|NP_996803.2|/0/1
RXRA	6256	5547	5.75094	14.8395	1.36757	Up	1.64945e-46	2.95401e-45	retinoid X receptor, alpha	K08524	GO:0000785//chromatin;GO:0031981//nuclear lumen;GO:0043005//neuron projection	GO:0001071//nucleic acid binding transcription factor activity;GO:0003704//specific RNA polymerase II transcription factor activity;GO:0003708//retinoic acid receptor activity;GO:0003712//transcription cofactor activity;GO:0008134//transcription factor binding;GO:0008289//lipid binding;GO:0010843;GO:0043566//structure-specific DNA binding;GO:0046914//transition metal ion binding;GO:0046983//prote…	GO:0000122//negative regulation of transcription from RNA polymerase II promoter;GO:0002067;GO:0006915//apoptotic process;GO:0006952//defense response;GO:0007409//axonogenesis;GO:0009755//hormone-mediated signaling pathway;GO:0010038//response to metal ion;GO:0010551;GO:0014855;GO:0016125//sterol metabolic process;GO:0022414//reproductive process;GO:0030522//intracellular receptor mediated signal…	gi|39645799|gb|AAH63827.1|/0/1
CCNE1	898	2021	9.19377	23.5686	1.35814	Up	2.46472e-27	2.65708e-26	cyclin E1	K06626	GO:0005815//microtubule organizing center;GO:0031981//nuclear lumen;GO:0043234//protein complex	GO:0003712//transcription cofactor activity;GO:0016772//transferase activity, transferring phosphorus-containing groups;GO:0019887//protein kinase regulator activity;GO:0035258//steroid hormone receptor binding	GO:0000082//G1/S transition of mitotic cell cycle;GO:0001541//ovarian follicle development;GO:0006259//DNA metabolic process;GO:0006355//regulation of transcription, DNA-dependent;GO:0006464//cellular protein modification process;GO:0009887//organ morphogenesis;GO:0014070//response to organic cyclic compound;GO:0030518//intracellular steroid hormone receptor signaling pathway;GO:0033273//response…	gi|17318559|ref|NP_001229.1|/0/1
RALGPS1	9649	6342	0.511828	1.29615	1.34051	Up	9.3158e-06	3.04059e-05	Ral GEF with PH domain and SH3 binding motif 1	K04349;K12326;K03099	GO:0016020//membrane;GO:0044424//intracellular part	GO:0030695//GTPase regulator activity	GO:0035556//intracellular signal transduction	gi|40788221|dbj|BAA20808.2|/7.66115e-162/1
GLI2	2736	6780	1.84901	4.61716	1.32025	Up	8.95336e-18	6.59663e-17	GLI family zinc finger 2	K06230	GO:0005626//insoluble fraction;GO:0043231//intracellular membrane-bounded organelle;GO:0072372//primary cilium	GO:0001071//nucleic acid binding transcription factor activity;GO:0030528//transcription regulator activity;GO:0043565//sequence-specific DNA binding;GO:0046914//transition metal ion binding	GO:0001649//osteoblast differentiation;GO:0001763//morphogenesis of a branching structure;GO:0002062//chondrocyte differentiation;GO:0006275//regulation of DNA replication;GO:0006357//regulation of transcription from RNA polymerase II promoter;GO:0006935//chemotaxis;GO:0007224//smoothened signaling pathway;GO:0007380//specification of segmental identity, head;GO:0007418//ventral midline developme…	gi|86991432|ref|NP_005261.2|/0/1
GSTP1	2950	986	277.445	691.279	1.31707	Up	0	0	glutathione S-transferase pi 1	K00799	GO:0016020//membrane;GO:0032991//macromolecular complex;GO:0043231//intracellular membrane-bounded organelle;GO:0044444//cytoplasmic part	GO:0016765//transferase activity, transferring alkyl or aryl (other than methyl) groups;GO:0019901//protein kinase binding;GO:0030234//enzyme regulator activity;GO:0042277//peptide binding	GO:0001101//response to acid;GO:0001960//negative regulation of cytokine-mediated signaling pathway;GO:0002526//acute inflammatory response;GO:0006790//sulfur compound metabolic process;GO:0006979//response to oxidative stress;GO:0007249//I-kappaB kinase/NF-kappaB cascade;GO:0008285//negative regulation of cell proliferation;GO:0009887//organ morphogenesis;GO:0010558;GO:0010939//regulation of nec…	gi|4504183|ref|NP_000843.1|/4.23703e-114/1
BRCA2	675	11386	0.32441	0.801075	1.30412	Up	4.78932e-06	1.60954e-05	breast cancer 2, early onset	K08775	GO:0005815//microtubule organizing center;GO:0016023//cytoplasmic membrane-bounded vesicle;GO:0031981//nuclear lumen;GO:0043234//protein complex	GO:0004402//histone acetyltransferase activity;GO:0015631//tubulin binding;GO:0019899//enzyme binding;GO:0030528//transcription regulator activity;GO:0043566//structure-specific DNA binding	GO:0000084//S phase of mitotic cell cycle;GO:0000725//recombinational repair;GO:0000910//cytokinesis;GO:0001832//blastocyst growth;GO:0006355//regulation of transcription, DNA-dependent;GO:0007346//regulation of mitotic cell cycle;GO:0007417//central nervous system development;GO:0007568//aging;GO:0008406//gonad development;GO:0008630//intrinsic apoptotic signaling pathway in response to DNA dama…	gi|119395734|ref|NP_000050.2|/0/1
COL4A4	1286	10341	1.19064	2.9292	1.29877	Up	7.45788e-17	5.23602e-16	collagen, type IV, alpha 4	K06237	GO:0005604//basement membrane	GO:0005488//binding	GO:0071842	gi|62822121|gb|AAY14670.1|/0/1
ARHGAP28	79822	5542	0.767483	1.86931	1.2843	Up	1.43541e-06	5.09615e-06	Rho GTPase activating protein 28	K08878	-	-	-	gi|311033539|sp|Q9P2N2.3|RHG28_HUMAN/0/1
ARHGAP29	9411	9121	1.41126	3.43212	1.28211	Up	4.70848e-17	3.3383e-16	Rho GTPase activating protein 29	K10360;K04450;K02649	GO:0044444//cytoplasmic part	GO:0005099//Ras GTPase activator activity;GO:0043169//cation binding	GO:0007265//Ras protein signal transduction;GO:0009966//regulation of signal transduction	gi|134304853|ref|NP_004806.3|/0/1
COL4A1	1282	6549	12.1178	29.4023	1.2788	Up	4.09522e-96	1.56147e-94	collagen, type IV, alpha 1	K06237	-	-	-	gi|148536825|ref|NP_001836.2|/0/1
MEGF8	1954	11167	2.30538	5.53599	1.26383	Up	1.74984e-31	2.19866e-30	multiple EGF-like-domains 8	K05636;K09434	GO:0031224//intrinsic to membrane	GO:0046872//metal ion binding	-	gi|58801254|dbj|BAA32469.2|/0/1
BCL2L1	598	2575	30.5149	71.7614	1.23369	Up	2.29306e-87	7.90532e-86	BCL2-like 1	K04570	GO:0005635//nuclear envelope;GO:0031224//intrinsic to membrane;GO:0031966//mitochondrial membrane	GO:0004869//cysteine-type endopeptidase inhibitor activity;GO:0019904//protein domain specific binding;GO:0046983//protein dimerization activity	GO:0000302//response to reactive oxygen species;GO:0001836//release of cytochrome c from mitochondria;GO:0006917//induction of apoptosis;GO:0007006//mitochondrial membrane organization;GO:0008283//cell proliferation;GO:0008406//gonad development;GO:0009628//response to abiotic stimulus;GO:0009725//response to hormone stimulus;GO:0010038//response to metal ion;GO:0010332//response to gamma radiati…	gi|392337908|ref|XP_003753389.1|/1.17461e-96/1
TMEM135	65084	9098	2.46057	5.48299	1.15597	Up	1.52336e-22	1.38891e-21	transmembrane protein 135	K11447;K02354	GO:0031224//intrinsic to membrane	-	-	gi|281182573|ref|NP_001162195.1|/0/1
FOXO1	2308	5738	3.51127	7.71243	1.13519	Up	1.21603e-19	9.86415e-19	forkhead box O1	K07201	GO:0031981//nuclear lumen;GO:0043234//protein complex;GO:0044444//cytoplasmic part	GO:0000981//sequence-specific DNA binding RNA polymerase II transcription factor activity;GO:0003702//RNA polymerase II transcription factor activity;GO:0016564//transcription repressor activity;GO:0019900//kinase binding;GO:0043565//sequence-specific DNA binding;GO:0043566//structure-specific DNA binding	GO:0000122//negative regulation of transcription from RNA polymerase II promoter;GO:0001944//vasculature development;GO:0006094//gluconeogenesis;GO:0007169//transmembrane receptor protein tyrosine kinase signaling pathway;GO:0008283//cell proliferation;GO:0031016//pancreas development;GO:0032872//regulation of stress-activated MAPK cascade;GO:0043066//negative regulation of apoptotic process;GO:0…	gi|9257222|ref|NP_002006.2|/0/1
NFKB1	4790	4093	11.8686	24.678	1.05608	Up	3.15326e-38	4.67564e-37	nuclear factor of kappa light polypeptide gene enhancer in B-cells 1	K02580	GO:0031981//nuclear lumen;GO:0043234//protein complex;GO:0044444//cytoplasmic part	GO:0001071//nucleic acid binding transcription factor activity;GO:0030528//transcription regulator activity;GO:0043565//sequence-specific DNA binding	GO:0000122//negative regulation of transcription from RNA polymerase II promoter;GO:0002224//toll-like receptor signaling pathway;GO:0007169//transmembrane receptor protein tyrosine kinase signaling pathway;GO:0009612//response to mechanical stimulus;GO:0010742//macrophage derived foam cell differentiation;GO:0010883//regulation of lipid storage;GO:0010894//negative regulation of steroid biosynth…	gi|397519725|ref|XP_003830004.1|/0/1
TGFB3	7043	3183	1.47695	3.00706	1.02574	Up	0.000109234	0.000315682	transforming growth factor, beta 3	K13377	GO:0031091//platelet alpha granule;GO:0042383//sarcolemma;GO:0044297//cell body;GO:0044421//extracellular region part	GO:0005160//transforming growth factor beta receptor binding;GO:0019838//growth factor binding;GO:0046983//protein dimerization activity	GO:0000165//MAPK cascade;GO:0001666//response to hypoxia;GO:0001775//cell activation;GO:0001837//epithelial to mesenchymal transition;GO:0001934//positive regulation of protein phosphorylation;GO:0002719;GO:0003006//developmental process involved in reproduction;GO:0006275//regulation of DNA replication;GO:0006357//regulation of transcription from RNA polymerase II promoter;GO:0006887//exocytosis…	gi|471361101|ref|XP_004371116.1|/0/1
RALB	5899	2275	18.647	37.9641	1.02569	Up	1.80773e-31	2.26624e-30	v-ral simian leukemia viral oncogene homolog B (ras related; GTP binding protein)	K07835	GO:0016020//membrane;GO:0044444//cytoplasmic part	GO:0017111//nucleoside-triphosphatase activity;GO:0032561//guanyl ribonucleotide binding	GO:0001927//exocyst assembly;GO:0007169//transmembrane receptor protein tyrosine kinase signaling pathway;GO:0007264//small GTPase mediated signal transduction;GO:0009207;GO:0012501//programmed cell death;GO:0032880//regulation of protein localization	gi|426337021|ref|XP_004031751.1|/2.15269e-108/1
FZD6	8323	3806	6.55825	0.0295863	-7.79224	Down	1.63573e-65	4.24931e-64	frizzled family receptor 6	K02376	GO:0016021//integral to membrane;GO:0031253//cell projection membrane;GO:0044424//intracellular part	GO:0004888//transmembrane signaling receptor activity;GO:0019904//protein domain specific binding	GO:0001738//morphogenesis of a polarized epithelium;GO:0001775//cell activation;GO:0006357//regulation of transcription from RNA polymerase II promoter;GO:0007187//G-protein coupled receptor signaling pathway, coupled to cyclic nucleotide second messenger;GO:0008544//epidermis development;GO:0014020;GO:0030178//negative regulation of Wnt receptor signaling pathway;GO:0030901//midbrain development…	gi|34734079|ref|NP_003497.2|/0/1
TNS1	7145	10276	18.3865	0.120539	-7.25301	Down	0	0	tensin 1	K00665;K01110;K08855	GO:0005924//cell-substrate adherens junction;GO:0043232	GO:0008092//cytoskeletal protein binding	-	gi|397495609|ref|XP_003818640.1|/0/1
WNT7A	7476	1732	1.22788	0.01	-6.94003	Down	2.0252e-06	7.08071e-06	wingless-type MMTV integration site family, member 7A	K00572	GO:0016020//membrane;GO:0031012//extracellular matrix	GO:0001664//G-protein coupled receptor binding;GO:0060089	GO:0000122//negative regulation of transcription from RNA polymerase II promoter;GO:0000187//activation of MAPK activity;GO:0001505//regulation of neurotransmitter levels;GO:0001570//vasculogenesis;GO:0001775//cell activation;GO:0003002//regionalization;GO:0003006//developmental process involved in reproduction;GO:0006915//apoptotic process;GO:0007163//establishment or maintenance of cell polarit…	gi|17505191|ref|NP_004616.2|/0/1
ARHGAP32	9743	10111	2.31368	0.0222739	-6.6987	Down	1.27991e-59	2.95809e-58	Rho GTPase activating protein 32	K08878;K04450	GO:0012505//endomembrane system;GO:0030425//dendrite;GO:0031090//organelle membrane;GO:0043231//intracellular membrane-bounded organelle;GO:0044430//cytoskeletal part;GO:0044444//cytoplasmic part;GO:0044459//plasma membrane part	GO:0005543//phospholipid binding;GO:0008047//enzyme activator activity	GO:0009966//regulation of signal transduction;GO:0035556//intracellular signal transduction	gi|218083800|ref|NP_001136157.1|/0/1
BMP4	652	1957	0.800735	0.01	-6.32325	Down	6.38422e-05	0.000189466	bone morphogenetic protein 4	K04662	GO:0031012//extracellular matrix;GO:0031982//vesicle;GO:0044424//intracellular part	GO:0005539//glycosaminoglycan binding;GO:0030528//transcription regulator activity;GO:0042802//identical protein binding;GO:0070696//transmembrane receptor protein serine/threonine kinase binding	GO:0000122//negative regulation of transcription from RNA polymerase II promoter;GO:0001656//metanephros development;GO:0001658//branching involved in ureteric bud morphogenesis;GO:0001709//cell fate determination;GO:0001934//positive regulation of protein phosphorylation;GO:0001935//endothelial cell proliferation;GO:0001944//vasculature development;GO:0002062//chondrocyte differentiation;GO:0002…	gi|397523676|ref|XP_003831847.1|/0/1
CSF1R	1436	4006	0.726464	0.0281092	-4.69178	Down	2.33626e-07	8.91821e-07	colony stimulating factor 1 receptor	K05090	GO:0016021//integral to membrane;GO:0043234//protein complex	GO:0004714//transmembrane receptor protein tyrosine kinase activity;GO:0032559;GO:0042802//identical protein binding	GO:0006464//cellular protein modification process;GO:0007167//enzyme linked receptor protein signaling pathway;GO:0032501//multicellular organismal process	gi|355750324|gb|EHH54662.1|/0/1
EGLN3	112399	2722	8.67653	0.455055	-4.25301	Down	3.77906e-49	7.23795e-48	egl nine homolog 3 (C. elegans)	K09592	GO:0043231//intracellular membrane-bounded organelle	GO:0016701//oxidoreductase activity, acting on single donors with incorporation of molecular oxygen;GO:0019842//vitamin binding;GO:0046914//transition metal ion binding	GO:0006950//response to stress;GO:0008152//metabolic process;GO:0008283//cell proliferation;GO:0012501//programmed cell death	gi|149051230|gb|EDM03403.1|/2.3745e-149/1
ARNT2	9915	6576	1.2085	0.0856185	-3.81916	Down	3.42914e-16	2.34776e-15	aryl-hydrocarbon receptor nuclear translocator 2	K15589	GO:0043231//intracellular membrane-bounded organelle;GO:0043234//protein complex	GO:0001071//nucleic acid binding transcription factor activity;GO:0003676//nucleic acid binding;GO:0005102//receptor binding;GO:0046983//protein dimerization activity;GO:0060089	GO:0006357//regulation of transcription from RNA polymerase II promoter;GO:0006915//apoptotic process;GO:0006950//response to stress;GO:0007399//nervous system development;GO:0008283//cell proliferation;GO:0043009//chordate embryonic development;GO:0043627//response to estrogen stimulus	gi|426380053|ref|XP_004056698.1|/0/1
CHN1	1123	2523	6.16665	0.446316	-3.78835	Down	2.60396e-30	3.13612e-29	chimerin 1	K10360;K13736;K04450;K02649	GO:0044444//cytoplasmic part	GO:0008047//enzyme activator activity;GO:0030674//protein binding, bridging;GO:0043169//cation binding	GO:0009966//regulation of signal transduction;GO:0035556//intracellular signal transduction;GO:0043087//regulation of GTPase activity	gi|62089162|dbj|BAD93025.1|/1.09217e-172/1
PRKCB	5579	8014	0.363141	0.0281022	-3.69178	Down	1.75134e-06	6.1636e-06	protein kinase C, beta	K02677	GO:0005626//insoluble fraction;GO:0005815//microtubule organizing center;GO:0005903//brush border;GO:0016020//membrane;GO:0043231//intracellular membrane-bounded organelle;GO:0044444//cytoplasmic part	GO:0003713//transcription coactivator activity;GO:0016247//channel regulator activity;GO:0019901//protein kinase binding;GO:0032559;GO:0035184//histone threonine kinase activity;GO:0035258//steroid hormone receptor binding;GO:0046914//transition metal ion binding	GO:0006875//cellular metal ion homeostasis;GO:0007249//I-kappaB kinase/NF-kappaB cascade;GO:0007267//cell-cell signaling;GO:0007599//hemostasis;GO:0010551;GO:0010646//regulation of cell communication;GO:0012501//programmed cell death;GO:0015031//protein transport;GO:0035405;GO:0042221//response to chemical stimulus;GO:0046649//lymphocyte activation;GO:0050851//antigen receptor-mediated signaling …	gi|47157322|ref|NP_997700.1|/0/1
PIK3R1	5295	6991	0.736496	0.0644288	-3.5149	Down	2.75006e-10	1.32445e-09	phosphoinositide-3-kinase, regulatory subunit 1 (alpha)	K02649	GO:0005624//membrane fraction;GO:0005942//phosphatidylinositol 3-kinase complex;GO:0016020//membrane;GO:0043231//intracellular membrane-bounded organelle	GO:0017046//peptide hormone binding;GO:0019900//kinase binding;GO:0019902//phosphatase binding;GO:0035004//phosphatidylinositol 3-kinase activity;GO:0035014//phosphatidylinositol 3-kinase regulator activity;GO:0035091//phosphatidylinositol binding;GO:0035258//steroid hormone receptor binding;GO:0070851//growth factor receptor binding	GO:0001101//response to acid;GO:0001932//regulation of protein phosphorylation;GO:0001952//regulation of cell-matrix adhesion;GO:0002027//regulation of heart rate;GO:0002762//negative regulation of myeloid leukocyte differentiation;GO:0006357//regulation of transcription from RNA polymerase II promoter;GO:0007162//negative regulation of cell adhesion;GO:0007169//transmembrane receptor protein tyr…	gi|32455252|ref|NP_852556.2|/0/1
PDGFRB	5159	5718	3.54312	0.315091	-3.49118	Down	1.28386e-36	1.81274e-35	platelet-derived growth factor receptor, beta polypeptide	K05089	GO:0016021//integral to membrane	GO:0004930//G-protein coupled receptor activity;GO:0005017//platelet-derived growth factor-activated receptor activity;GO:0019838//growth factor binding;GO:0032559;GO:0070851//growth factor receptor binding	GO:0001932//regulation of protein phosphorylation;GO:0006935//chemotaxis;GO:0007169//transmembrane receptor protein tyrosine kinase signaling pathway;GO:0008283//cell proliferation;GO:0009887//organ morphogenesis;GO:0016477//cell migration;GO:0035270//endocrine system development;GO:0043009//chordate embryonic development;GO:0048871//multicellular organismal homeostasis;GO:0060537//muscle tissue …	gi|4505683|ref|NP_002600.1|/0/1
EGFR	1956	5616	349.686	47.8413	-2.86973	Down	0	0	epidermal growth factor receptor	K04361	GO:0005635//nuclear envelope;GO:0030128//clathrin coat of endocytic vesicle;GO:0031224//intrinsic to membrane;GO:0044421//extracellular region part;GO:0044459//plasma membrane part	GO:0003779//actin binding;GO:0004709//MAP kinase kinase kinase activity;GO:0004714//transmembrane receptor protein tyrosine kinase activity;GO:0019902//phosphatase binding;GO:0030234//enzyme regulator activity;GO:0032559;GO:0043566//structure-specific DNA binding;GO:0046983//protein dimerization activity	GO:0006915//apoptotic process;GO:0006935//chemotaxis;GO:0007155//cell adhesion;GO:0007173//epidermal growth factor receptor signaling pathway;GO:0008284//positive regulation of cell proliferation;GO:0009411//response to UV;GO:0010740//positive regulation of intracellular protein kinase cascade;GO:0010863//positive regulation of phospholipase C activity;GO:0016477//cell migration;GO:0019722//calci…	gi|41327736|ref|NP_958441.1|/0/1
ARMC4	55130	3572	3.03957	0.441343	-2.7839	Down	1.38474e-16	9.62399e-16	armadillo repeat containing 4	K10056	-	-	-	gi|31657114|ref|NP_060546.2|/0/1
STARD8	9754	4962	3.06785	0.63542	-2.27145	Down	2.6359e-18	1.99082e-17	StAR-related lipid transfer (START) domain containing 8	K08878;K10360;K07526;K12490	GO:0005924//cell-substrate adherens junction;GO:0044444//cytoplasmic part	GO:0008047//enzyme activator activity	GO:0009966//regulation of signal transduction;GO:0035556//intracellular signal transduction	gi|51476537|emb|CAH18253.1|/0/1
PTEN	5728	5572	16.7535	3.51639	-2.2523	Down	3.21642e-103	1.31746e-101	phosphatase and tensin homolog	K01110	GO:0005624//membrane fraction;GO:0016604//nuclear body;GO:0030425//dendrite;GO:0044444//cytoplasmic part;GO:0044459//plasma membrane part	GO:0004721//phosphoprotein phosphatase activity;GO:0019904//protein domain specific binding;GO:0034593//phosphatidylinositol bisphosphate phosphatase activity;GO:0034594//phosphatidylinositol trisphosphate phosphatase activity;GO:0046872//metal ion binding;GO:0070851//growth factor receptor binding	GO:0001783//B cell apoptotic process;GO:0001932//regulation of protein phosphorylation;GO:0001953//negative regulation of cell-matrix adhesion;GO:0003006//developmental process involved in reproduction;GO:0006470//protein dephosphorylation;GO:0007169//transmembrane receptor protein tyrosine kinase signaling pathway;GO:0007611//learning or memory;GO:0008285//negative regulation of cell proliferati…	gi|441642378|ref|XP_003262607.2|/0/1
FGFR3	2261	4310	3.09045	0.653164	-2.2423	Down	5.81726e-16	3.93879e-15	fibroblast growth factor receptor 3	K05094	GO:0000323//lytic vacuole;GO:0016021//integral to membrane;GO:0044421//extracellular region part;GO:0044459//plasma membrane part;GO:0045202//synapse	GO:0004714//transmembrane receptor protein tyrosine kinase activity;GO:0005102//receptor binding;GO:0005539//glycosaminoglycan binding;GO:0019838//growth factor binding;GO:0032559	GO:0000122//negative regulation of transcription from RNA polymerase II promoter;GO:0001503//ossification;GO:0001934//positive regulation of protein phosphorylation;GO:0001935//endothelial cell proliferation;GO:0001942//hair follicle development;GO:0002067;GO:0002088//lens development in camera-type eye;GO:0003151//outflow tract morphogenesis;GO:0006915//apoptotic process;GO:0007088//regulation o…	gi|4503711|ref|NP_000133.1|/0/1
CDKN1A	1026	2284	65.13	14.3468	-2.18259	Down	3.5088e-157	2.55787e-155	cyclin-dependent kinase inhibitor 1A (p21, Cip1)	K06625	GO:0031981//nuclear lumen;GO:0043234//protein complex;GO:0044444//cytoplasmic part	GO:0005515//protein binding;GO:0016538//cyclin-dependent protein kinase regulator activity;GO:0043169//cation binding	GO:0000079//regulation of cyclin-dependent protein serine/threonine kinase activity;GO:0006917//induction of apoptosis;GO:0007050//cell cycle arrest;GO:0007154//cell communication;GO:0007264//small GTPase mediated signal transduction;GO:0008284//positive regulation of cell proliferation;GO:0009416//response to light stimulus;GO:0009887//organ morphogenesis;GO:0010035//response to inorganic substa…	gi|62089348|dbj|BAD93118.1|/5.73227e-85/1
CDKN2B	1030	4001	15.1629	3.71505	-2.02909	Down	1.64823e-59	3.79346e-58	cyclin-dependent kinase inhibitor 2B (p15, inhibits CDK4)	K04685	GO:0043231//intracellular membrane-bounded organelle;GO:0044444//cytoplasmic part	GO:0016538//cyclin-dependent protein kinase regulator activity;GO:0019900//kinase binding	GO:0000082//G1/S transition of mitotic cell cycle;GO:0007154//cell communication;GO:0007179//transforming growth factor beta receptor signaling pathway;GO:0007584//response to nutrient;GO:0008285//negative regulation of cell proliferation;GO:0010033//response to organic substance;GO:0016310//phosphorylation;GO:0030099//myeloid cell differentiation;GO:0030855//epithelial cell differentiation;GO:00…	gi|402897286|ref|XP_003911699.1|/1.84218e-92/1
TCF7L2	6934	4092	15.3728	4.45799	-1.78591	Down	3.4791e-52	7.14295e-51	transcription factor 7-like 2 (T-cell specific, HMG-box)	K04491	GO:0005654//nucleoplasm;GO:0016604//nuclear body;GO:0044451//nucleoplasm part;GO:0071664//catenin-TCF7L2 complex	GO:0001071//nucleic acid binding transcription factor activity;GO:0016564//transcription repressor activity;GO:0019900//kinase binding;GO:0019904//protein domain specific binding;GO:0043565//sequence-specific DNA binding;GO:0051427	GO:0000122//negative regulation of transcription from RNA polymerase II promoter;GO:0001503//ossification;GO:0001944//vasculature development;GO:0006606//protein import into nucleus;GO:0007399//nervous system development;GO:0008284//positive regulation of cell proliferation;GO:0008543//fibroblast growth factor receptor signaling pathway;GO:0008544//epidermis development;GO:0009746;GO:0010551;GO:0…	gi|309384254|ref|NP_001185456.1|/0/1
TGFBR1	7046	6475	11.8414	3.47816	-1.76744	Down	2.38834e-62	5.79505e-61	transforming growth factor, beta receptor 1	K04674	GO:0031224//intrinsic to membrane;GO:0043235//receptor complex;GO:0044459//plasma membrane part	GO:0005024//transforming growth factor beta-activated receptor activity;GO:0005160//transforming growth factor beta receptor binding;GO:0019838//growth factor binding;GO:0019899//enzyme binding;GO:0032559;GO:0043169//cation binding;GO:0046332//SMAD binding;GO:0046983//protein dimerization activity	GO:0000165//MAPK cascade;GO:0001701//in utero embryonic development;GO:0001934//positive regulation of protein phosphorylation;GO:0003002//regionalization;GO:0006915//apoptotic process;GO:0006928//cellular component movement;GO:0006950//response to stress;GO:0007178//transmembrane receptor protein serine/threonine kinase signaling pathway;GO:0007276//gamete generation;GO:0008283//cell proliferati…	gi|402896861|ref|XP_003911501.1|/0/1
MET	4233	6695	38.4863	12.2613	-1.65023	Down	2.14502e-186	1.88807e-184	met proto-oncogene (hepatocyte growth factor receptor)	K05099	GO:0005626//insoluble fraction;GO:0016021//integral to membrane;GO:0016323//basolateral plasma membrane	GO:0004714//transmembrane receptor protein tyrosine kinase activity;GO:0032559	GO:0000165//MAPK cascade;GO:0006468//protein phosphorylation;GO:0006935//chemotaxis;GO:0007169//transmembrane receptor protein tyrosine kinase signaling pathway;GO:0007417//central nervous system development;GO:0007610//behavior;GO:0008283//cell proliferation;GO:0014706//striated muscle tissue development;GO:0016477//cell migration;GO:0048513//organ development;GO:0051146//striated muscle cell di…	gi|42741655|ref|NP_000236.2|/0/1
CTNNAL1	8727	2445	27.1474	8.88869	-1.61077	Down	9.81752e-48	1.8152e-46	catenin (cadherin-associated protein), alpha-like 1	K12597;K05691	GO:0005856//cytoskeleton;GO:0016020//membrane;GO:0044444//cytoplasmic part	GO:0050839//cell adhesion molecule binding	GO:0007265//Ras protein signal transduction	gi|4503129|ref|NP_003789.1|/0/1
STAT3	6774	4978	100.082	38.0931	-1.39357	Down	9.54974e-280	1.32798e-277	signal transducer and activator of transcription 3 (acute-phase response factor)	K04692	GO:0016020//membrane;GO:0031981//nuclear lumen;GO:0044444//cytoplasmic part	GO:0001071//nucleic acid binding transcription factor activity;GO:0003677//DNA binding;GO:0019900//kinase binding;GO:0030528//transcription regulator activity;GO:0035258//steroid hormone receptor binding;GO:0046872//metal ion binding;GO:0048020//CCR chemokine receptor binding;GO:0060089	GO:0000003//reproduction;GO:0002526//acute inflammatory response;GO:0006357//regulation of transcription from RNA polymerase II promoter;GO:0006605//protein targeting;GO:0007169//transmembrane receptor protein tyrosine kinase signaling pathway;GO:0007259//JAK-STAT cascade;GO:0007631//feeding behavior;GO:0019221//cytokine-mediated signaling pathway;GO:0033500//carbohydrate homeostasis;GO:0035264//…	gi|332847876|ref|XP_001165417.2|/0/1
IGF1R	3480	11242	12.5452	4.858	-1.3687	Down	1.88012e-78	5.81536e-77	insulin-like growth factor 1 receptor	K05087	GO:0016021//integral to membrane;GO:0042598;GO:0042995//cell projection;GO:0044459//plasma membrane part	GO:0004714//transmembrane receptor protein tyrosine kinase activity;GO:0005102//receptor binding;GO:0005520//insulin-like growth factor binding;GO:0017046//peptide hormone binding;GO:0019900//kinase binding;GO:0032559;GO:0043169//cation binding	GO:0000910//cytokinesis;GO:0002009//morphogenesis of an epithelium;GO:0002376//immune system process;GO:0006275//regulation of DNA replication;GO:0006468//protein phosphorylation;GO:0007163//establishment or maintenance of cell polarity;GO:0007169//transmembrane receptor protein tyrosine kinase signaling pathway;GO:0007417//central nervous system development;GO:0008283//cell proliferation;GO:0010…	gi|4557665|ref|NP_000866.1|/0/1
RARA	5914	3494	10.924	4.38304	-1.3175	Down	2.95354e-21	2.56428e-20	retinoic acid receptor, alpha	K08527	GO:0005624//membrane fraction;GO:0031981//nuclear lumen;GO:0043005//neuron projection;GO:0044297//cell body;GO:0044444//cytoplasmic part	GO:0001071//nucleic acid binding transcription factor activity;GO:0003682//chromatin binding;GO:0003712//transcription cofactor activity;GO:0003729//mRNA binding;GO:0004879//ligand-activated sequence-specific DNA binding RNA polymerase II transcription factor activity;GO:0005501//retinoid binding;GO:0010843;GO:0019207//kinase regulator activity;GO:0030371//translation repressor activity;GO:003052…	GO:0001655//urogenital system development;GO:0001818//negative regulation of cytokine production;GO:0001819//positive regulation of cytokine production;GO:0002762//negative regulation of myeloid leukocyte differentiation;GO:0003416//endochondral bone growth;GO:0006446//regulation of translational initiation;GO:0006464//cellular protein modification process;GO:0006909//phagocytosis;GO:0008283//cel…	gi|4506419|ref|NP_000955.1|/0/1
SYDE1	85360	3254	41.9657	17.5795	-1.25532	Down	9.8495e-67	2.61201e-65	synapse defective 1, Rho GTPase, homolog 1 (C. elegans)	K08878;K04450	GO:0044444//cytoplasmic part	GO:0005099//Ras GTPase activator activity	GO:0032321//positive regulation of Rho GTPase activity	gi|42475970|ref|NP_149014.3|/0/1
FGFRL1	53834	3215	16.9899	7.25018	-1.22859	Down	7.70404e-27	8.1409e-26	fibroblast growth factor receptor-like 1	K01217;K05095;K05094	GO:0030133//transport vesicle;GO:0031224//intrinsic to membrane	GO:0004714//transmembrane receptor protein tyrosine kinase activity;GO:0005539//glycosaminoglycan binding;GO:0019838//growth factor binding	GO:0003170//heart valve development;GO:0007169//transmembrane receptor protein tyrosine kinase signaling pathway;GO:0008283//cell proliferation;GO:0016049//cell growth;GO:0060411//cardiac septum morphogenesis;GO:0060538//skeletal muscle organ development	gi|51988910|ref|NP_068742.2|/0/1
HIF1A	3091	4082	38.4987	16.8274	-1.194	Down	7.42888e-71	2.10142e-69	hypoxia inducible factor 1, alpha subunit (basic helix-loop-helix transcription factor)	K08268	GO:0031981//nuclear lumen;GO:0043234//protein complex	GO:0000981//sequence-specific DNA binding RNA polymerase II transcription factor activity;GO:0003677//DNA binding;GO:0019899//enzyme binding;GO:0031072//heat shock protein binding;GO:0046983//protein dimerization activity;GO:0060089	GO:0000904//cell morphogenesis involved in differentiation;GO:0001819//positive regulation of cytokine production;GO:0001935//endothelial cell proliferation;GO:0002246//wound healing involved in inflammatory response;GO:0006110//regulation of glycolysis;GO:0006357//regulation of transcription from RNA polymerase II promoter;GO:0009100//glycoprotein metabolic process;GO:0009967//positive regulatio…	gi|4504385|ref|NP_001521.1|/0/1
ARHGAP23	57636	5913	27.2588	11.9785	-1.18627	Down	6.7085e-72	1.91731e-70	Rho GTPase activating protein 23	K08878;K05732;K04450;K07526	GO:0044464//cell part	GO:0008047//enzyme activator activity	GO:0023052//signaling	gi|313661470|ref|NP_001186346.1|/0/1
ARAF	369	2571	76.58	34.1189	-1.1664	Down	3.78834e-85	1.25379e-83	v-raf murine sarcoma 3611 viral oncogene homolog	K08845	GO:0000267//cell fraction;GO:0043231//intracellular membrane-bounded organelle;GO:0044444//cytoplasmic part	GO:0004672//protein kinase activity;GO:0004871//signal transducer activity;GO:0032559;GO:0043169//cation binding	GO:0001934//positive regulation of protein phosphorylation;GO:0006915//apoptotic process;GO:0007165//signal transduction	gi|4502193|ref|NP_001645.1|/0/1
DIXDC1	85458	5899	4.87648	2.19522	-1.15147	Down	1.49867e-13	8.93374e-13	DIX domain containing 1	K02353;K10366;K05699	GO:0005924//cell-substrate adherens junction;GO:0044424//intracellular part	GO:0008092//cytoskeletal protein binding;GO:0060089	GO:0007166//cell surface receptor signaling pathway;GO:0032501//multicellular organismal process	gi|83816971|ref|NP_001033043.1|/0/1
GSTT1	2952	1076	21.1172	9.62798	-1.13311	Down	9.26318e-11	4.59356e-10	glutathione S-transferase theta 1	K00799	GO:0000267//cell fraction;GO:0044444//cytoplasmic part	GO:0004601//peroxidase activity;GO:0016765//transferase activity, transferring alkyl or aryl (other than methyl) groups	GO:0006790//sulfur compound metabolic process	gi|397479634|ref|XP_003811114.1|/7.43068e-139/1
LAMB2	3913	5817	27.2661	12.4859	-1.12681	Down	2.46136e-65	6.36415e-64	laminin, beta 2 (laminin S)	K06243	GO:0043256//laminin complex	-	GO:0048676	gi|119703755|ref|NP_002283.3|/0/1
TP53	7157	2724	79.182	36.8737	-1.10258	Down	3.25004e-85	1.07779e-83	tumor protein p53	K04451	GO:0000267//cell fraction;GO:0005667//transcription factor complex;GO:0016604//nuclear body;GO:0034399//nuclear periphery;GO:0044427//chromosomal part;GO:0044444//cytoplasmic part	GO:0001071//nucleic acid binding transcription factor activity;GO:0003690//double-stranded DNA binding;GO:0016564//transcription repressor activity;GO:0019900//kinase binding;GO:0019903//protein phosphatase binding;GO:0032559;GO:0043565//sequence-specific DNA binding;GO:0046914//transition metal ion binding;GO:0046983//protein dimerization activity	GO:0000077//DNA damage checkpoint;GO:0000122//negative regulation of transcription from RNA polymerase II promoter;GO:0001934//positive regulation of protein phosphorylation;GO:0006281//DNA repair;GO:0006919//activation of cysteine-type endopeptidase activity involved in apoptotic process;GO:0006984//ER-nucleus signaling pathway;GO:0007006//mitochondrial membrane organization;GO:0007264//small GT…	gi|75914681|gb|ABA29753.1|/0/1
FZD8	8325	3186	3.23217	1.51979	-1.08863	Down	2.53044e-05	7.83859e-05	frizzled family receptor 8	K02375	GO:0031224//intrinsic to membrane;GO:0043231//intracellular membrane-bounded organelle	GO:0004888//transmembrane signaling receptor activity;GO:0019904//protein domain specific binding	GO:0001932//regulation of protein phosphorylation;GO:0006357//regulation of transcription from RNA polymerase II promoter;GO:0010001//glial cell differentiation;GO:0016055//Wnt receptor signaling pathway;GO:0021515//cell differentiation in spinal cord;GO:0021872//forebrain generation of neurons;GO:0030217//T cell differentiation;GO:0043388//positive regulation of DNA binding;GO:0045137//developme…	gi|13994190|ref|NP_114072.1|/0/1
MGST1	4257	1509	110.819	52.7582	-1.07074	Down	1.784e-63	4.43934e-62	microsomal glutathione S-transferase 1	K00799	GO:0019866//organelle inner membrane;GO:0031224//intrinsic to membrane;GO:0031966//mitochondrial membrane;GO:0042598;GO:0044439	GO:0005515//protein binding;GO:0016740//transferase activity;GO:0016765//transferase activity, transferring alkyl or aryl (other than methyl) groups;GO:0042802//identical protein binding	GO:0002237//response to molecule of bacterial origin;GO:0003006//developmental process involved in reproduction;GO:0006790//sulfur compound metabolic process;GO:0009719;GO:0010033//response to organic substance;GO:0044237//cellular metabolic process;GO:0051260//protein homooligomerization	gi|119616770|gb|EAW96364.1|/6.67986e-57/1
DAPK1	1612	5942	7.10167	3.39219	-1.06594	Down	4.07392e-17	2.90458e-16	death-associated protein kinase 1	K08803	GO:0005856//cytoskeleton	GO:0004672//protein kinase activity;GO:0005515//protein binding;GO:0032559	GO:0006464//cellular protein modification process;GO:0006917//induction of apoptosis;GO:0035556//intracellular signal transduction;GO:0043066//negative regulation of apoptotic process	gi|62087322|dbj|BAD92108.1|/0/1
STAT5B	6777	5171	37.9671	18.4881	-1.03815	Down	1.21901e-70	3.43064e-69	signal transducer and activator of transcription 5B	K11224	GO:0031981//nuclear lumen;GO:0044444//cytoplasmic part	GO:0001071//nucleic acid binding transcription factor activity;GO:0035258//steroid hormone receptor binding;GO:0043566//structure-specific DNA binding;GO:0046872//metal ion binding;GO:0060089	GO:0001779//natural killer cell differentiation;GO:0001787//natural killer cell proliferation;GO:0001912//positive regulation of leukocyte mediated cytotoxicity;GO:0002237//response to molecule of bacterial origin;GO:0002260//lymphocyte homeostasis;GO:0002526//acute inflammatory response;GO:0006357//regulation of transcription from RNA polymerase II promoter;GO:0006599;GO:0006790//sulfur compound…	gi|62087420|dbj|BAD92157.1|/0/1
ATRN	8455	8658	10.3166	5.07232	-1.02425	Down	2.14454e-32	2.75527e-31	attractin	K14616;K05636;K09434	GO:0016021//integral to membrane;GO:0044421//extracellular region part;GO:0044424//intracellular part	GO:0004871//signal transducer activity;GO:0030246//carbohydrate binding	GO:0006952//defense response;GO:0035264//multicellular organism growth	gi|333440461|ref|NP_001193976.1|/0/1
TMC5	79838	4917	15.0926	7.53451	-1.00226	Down	2.71246e-26	2.82301e-25	transmembrane channel-like 5	K06237;K11447;K01539;K08857;K00939	GO:0031224//intrinsic to membrane	-	-	gi|31377679|ref|NP_079056.2|/0/1
④MAPK signaling pathway
Symbol	GeneID	Gene_length	shNC-RPKM	shNrf1-RPKM	log2 Ratio(shNrf1/shNC)	Up-Down-Regulation(shNrf1/shNC)	P-value	FDR	Description	KEGG Orthology	GO Component	GO Function	GO Process	Blast nr
RASGEF1A	221002	3235	0.0346001	14.6544	8.72634	Up	1.10399e-125	5.74492e-124	RasGEF domain family, member 1A	K07376;K08020;K08018	GO:0044464//cell part	GO:0005083//small GTPase regulator activity	GO:0009966//regulation of signal transduction;GO:0048870//cell motility	gi|119606997|gb|EAW86591.1|/0/1
RASGEF1B	153020	2269	0.01	1.14144	6.83471	Up	1.1091e-07	4.37194e-07	RasGEF domain family, member 1B	K07376;K06277;K08018	GO:0044464//cell part	GO:0005083//small GTPase regulator activity	GO:0009966//regulation of signal transduction	gi|22749129|ref|NP_689758.1|/0/1
MAPK8IP1	9479	3234	0.01	1.04458	6.70678	Up	8.4844e-10	3.9416e-09	mitogen-activated protein kinase 8 interacting protein 1	K04434	GO:0005626//insoluble fraction;GO:0030424//axon;GO:0030426//growth cone;GO:0043231//intracellular membrane-bounded organelle;GO:0044444//cytoplasmic part	GO:0008092//cytoskeletal protein binding;GO:0016772//transferase activity, transferring phosphorus-containing groups;GO:0019887//protein kinase regulator activity;GO:0019901//protein kinase binding;GO:0032947//protein complex scaffold	GO:0006351//transcription, DNA-dependent;GO:0006810//transport;GO:0043066//negative regulation of apoptotic process;GO:0043407//negative regulation of MAP kinase activity;GO:0043409//negative regulation of MAPK cascade	gi|4885433|ref|NP_005447.1|/0/1
CACNA1H	8912	8097	0.0138238	0.737074	5.73658	Up	2.6504e-15	1.73767e-14	calcium channel, voltage-dependent, T type, alpha 1H subunit	K04855	GO:0034704//calcium channel complex	GO:0005245//voltage-gated calcium channel activity	GO:0000768//syncytium formation by plasma membrane fusion;GO:0003012//muscle system process;GO:0006935//chemotaxis;GO:0007340//acrosome reaction;GO:0044057;GO:0048513//organ development	gi|53832011|ref|NP_001005407.1|/0/1
STMN3	50861	2538	0.132307	3.90437	4.88313	Up	4.04898e-23	3.79833e-22	stathmin-like 3	K04381	GO:0000267//cell fraction;GO:0042995//cell projection;GO:0044424//intracellular part;GO:0044444//cytoplasmic part	GO:0005515//protein binding;GO:0008092//cytoskeletal protein binding	GO:0000226//microtubule cytoskeleton organization;GO:0016601//Rac protein signal transduction;GO:0030030//cell projection organization;GO:0032319//regulation of Rho GTPase activity;GO:0033043//regulation of organelle organization;GO:0048731	gi|397477196|ref|XP_003809964.1|/2.21039e-109/1
NFATC1	4772	4762	0.0235051	0.662107	4.81602	Up	5.30692e-08	2.15137e-07	nuclear factor of activated T-cells, cytoplasmic, calcineurin-dependent 1	K04446	GO:0043231//intracellular membrane-bounded organelle	GO:0001071//nucleic acid binding transcription factor activity;GO:0005527//macrolide binding;GO:0030528//transcription regulator activity;GO:0043565//sequence-specific DNA binding	GO:0000904//cell morphogenesis involved in differentiation;GO:0006351//transcription, DNA-dependent;GO:0006357//regulation of transcription from RNA polymerase II promoter;GO:0007165//signal transduction;GO:0022402//cell cycle process;GO:0048513//organ development;GO:0070838//divalent metal ion transport	gi|8928220|sp|O95644.3|NFAC1_HUMAN/0/1
KAZN	23254	6047	0.0185102	0.502786	4.76355	Up	1.03023e-07	4.07074e-07	kazrin, periplakin interacting protein	K10392;K10386;K10421;K04407	GO:0005856//cytoskeleton;GO:0005911//cell-cell junction;GO:0043231//intracellular membrane-bounded organelle	-	GO:0030216//keratinocyte differentiation	gi|65301130|ref|NP_001018000.1|/0/1
CACNA1D	776	7726	0.01	0.262348	4.71341	Up	3.60288e-06	1.22752e-05	calcium channel, voltage-dependent, L type, alpha 1D subunit	K04851	GO:0034704//calcium channel complex	GO:0005262//calcium channel activity	GO:0006935//chemotaxis;GO:0015980//energy derivation by oxidation of organic compounds;GO:0030073//insulin secretion;GO:0032412//regulation of ion transmembrane transporter activity;GO:0070838//divalent metal ion transport	gi|4502527|ref|NP_000711.1|/0/1
SYNGR3	9143	2076	0.215667	4.50205	4.3837	Up	1.24212e-20	1.05031e-19	synaptogyrin 3	K04403;K1	GO:0016021//integral to membrane;GO:0030136//clathrin-coated vesicle;GO:0044459//plasma membrane part;GO:0045202//synapse	GO:0019904//protein domain specific binding	GO:0032409	gi|6631112|ref|NP_004200.2|/1.81423e-90/1
TESC	54997	1044	3.32363	43.1439	3.69832	Up	1.2985e-83	4.21326e-82	tescalcin	K06268;K10301	GO:0016020//membrane;GO:0031252//cell leading edge;GO:0043231//intracellular membrane-bounded organelle	GO:0004857//enzyme inhibitor activity;GO:0046872//metal ion binding	GO:0008283//cell proliferation;GO:0008406//gonad development;GO:0030155//regulation of cell adhesion;GO:0032583;GO:0045639//positive regulation of myeloid cell differentiation	gi|119618506|gb|EAW98100.1|/2.85483e-134/1
PDGFA	5154	2809	2.23146	26.9387	3.59362	Up	3.98906e-136	2.33254e-134	platelet-derived growth factor alpha polypeptide	K04359	GO:0012505//endomembrane system;GO:0031091//platelet alpha granule;GO:0042995//cell projection;GO:0044421//extracellular region part;GO:0044432//endoplasmic reticulum part	GO:0019838//growth factor binding;GO:0042802//identical protein binding;GO:0043498//cell surface binding;GO:0046983//protein dimerization activity;GO:0070851//growth factor receptor binding	GO:0001934//positive regulation of protein phosphorylation;GO:0006275//regulation of DNA replication;GO:0006661//phosphatidylinositol biosynthetic process;GO:0006887//exocytosis;GO:0006935//chemotaxis;GO:0007169//transmembrane receptor protein tyrosine kinase signaling pathway;GO:0007178//transmembrane receptor protein serine/threonine kinase signaling pathway;GO:0008284//positive regulation of c…	gi|77695917|ref|NP_002598.4|/3.38198e-98/1
MECOM	2122	5740	0.741009	8.18057	3.46464	Up	1.61948e-82	5.20373e-81	MDS1 and EVI1 complex locus	K04462	GO:0016585//chromatin remodeling complex;GO:0016604//nuclear body	GO:0001071//nucleic acid binding transcription factor activity;GO:0003676//nucleic acid binding;GO:0042802//identical protein binding;GO:0046914//transition metal ion binding	GO:0002262//myeloid cell homeostasis;GO:0006357//regulation of transcription from RNA polymerase II promoter;GO:0006952//defense response;GO:0007049//cell cycle;GO:0007179//transforming growth factor beta receptor signaling pathway;GO:0007420//brain development;GO:0008283//cell proliferation;GO:0012501//programmed cell death;GO:0030326//embryonic limb morphogenesis;GO:0043009//chordate embryonic …	gi|545408|gb|AAB29907.1|/0/1
PPM1N	147699	1718	0.390913	4.1293	3.40098	Up	2.05052e-13	1.21403e-12	protein phosphatase, Mg2+/Mn2+ dependent, 1N (putative)	K04461	-	GO:0016791//phosphatase activity;GO:0046914//transition metal ion binding	GO:0006796//phosphate-containing compound metabolic process	gi|122937199|ref|NP_001073870.1|/0/1
PLA2G4A	5321	2940	2.7031	23.019	3.09014	Up	1.84001e-106	7.78733e-105	phospholipase A2, group IVA (cytosolic, calcium-dependent)	K01047	GO:0005626//insoluble fraction;GO:0030141//secretory granule;GO:0031090//organelle membrane	GO:0004623//phospholipase A2 activity;GO:0005543//phospholipid binding;GO:0046872//metal ion binding	GO:0000038//very long-chain fatty acid metabolic process;GO:0000302//response to reactive oxygen species;GO:0001516//prostaglandin biosynthetic process;GO:0001660//fever generation;GO:0001775//cell activation;GO:0002237//response to molecule of bacterial origin;GO:0003006//developmental process involved in reproduction;GO:0006906//vesicle fusion;GO:0006915//apoptotic process;GO:0007599//hemostasi…	gi|23943920|ref|NP_077734.1|/0/1
FGFR1	2260	5963	0.938549	6.13731	2.7091	Up	4.16204e-51	8.32811e-50	fibroblast growth factor receptor 1	K04362	GO:0005626//insoluble fraction;GO:0016021//integral to membrane	GO:0004714//transmembrane receptor protein tyrosine kinase activity;GO:0005539//glycosaminoglycan binding;GO:0019838//growth factor binding;GO:0032559;GO:0042802//identical protein binding	GO:0003156//regulation of organ formation;GO:0006464//cellular protein modification process;GO:0006915//apoptotic process;GO:0006935//chemotaxis;GO:0007243//intracellular protein kinase cascade;GO:0007420//brain development;GO:0007431//salivary gland development;GO:0008284//positive regulation of cell proliferation;GO:0008543//fibroblast growth factor receptor signaling pathway;GO:0010467//gene e…	gi|62087418|dbj|BAD92156.1|/0/1
RELB	5971	2297	3.75216	23.1388	2.62452	Up	5.17244e-71	1.47068e-69	v-rel reticuloendotheliosis viral oncogene homolog B	K09253	GO:0043231//intracellular membrane-bounded organelle;GO:0044444//cytoplasmic part	GO:0001071//nucleic acid binding transcription factor activity;GO:0003676//nucleic acid binding;GO:0003712//transcription cofactor activity	GO:0001773//myeloid dendritic cell activation;GO:0006351//transcription, DNA-dependent;GO:0042093//T-helper cell differentiation	gi|35493878|ref|NP_006500.2|/0/1
NR4A1	3164	2692	7.60901	41.2022	2.43694	Up	1.68447e-134	9.6787e-133	nuclear receptor subfamily 4, group A, member 1	K04465	GO:0031981//nuclear lumen	GO:0001071//nucleic acid binding transcription factor activity;GO:0003677//DNA binding;GO:0004879//ligand-activated sequence-specific DNA binding RNA polymerase II transcription factor activity;GO:0030528//transcription regulator activity;GO:0042802//identical protein binding;GO:0046914//transition metal ion binding;GO:0046983//protein dimerization activity	GO:0007169//transmembrane receptor protein tyrosine kinase signaling pathway;GO:0010466//negative regulation of peptidase activity;GO:0010551;GO:0012502//induction of programmed cell death;GO:0048017//inositol lipid-mediated signaling	gi|119578627|gb|EAW58223.1|/0/1
DUSP4	1846	6440	2.67662	14.1456	2.40187	Up	6.10234e-109	2.6435e-107	dual specificity phosphatase 4	K04459	GO:0000267//cell fraction;GO:0031981//nuclear lumen	GO:0008138//protein tyrosine/serine/threonine phosphatase activity	GO:0000165//MAPK cascade;GO:0001704//formation of primary germ layer;GO:0002224//toll-like receptor signaling pathway;GO:0006470//protein dephosphorylation;GO:0007169//transmembrane receptor protein tyrosine kinase signaling pathway;GO:0042221//response to chemical stimulus	gi|16950652|ref|NP_476499.1|/1.68896e-175/1
MAP3K1	4214	7522	1.0714	5.43416	2.34256	Up	2.10344e-48	3.94198e-47	mitogen-activated protein kinase kinase kinase 1, E3 ubiquitin protein ligase	K04416	GO:0005626//insoluble fraction;GO:0043232;GO:0044444//cytoplasmic part	GO:0004708//MAP kinase kinase activity;GO:0004709//MAP kinase kinase kinase activity;GO:0008289//lipid binding;GO:0019787//small conjugating protein ligase activity;GO:0019901//protein kinase binding;GO:0032559;GO:0046914//transition metal ion binding	GO:0000186//activation of MAPKK activity;GO:0000187//activation of MAPK activity;GO:0001654//eye development;GO:0002224//toll-like receptor signaling pathway;GO:0006915//apoptotic process;GO:0007178//transmembrane receptor protein serine/threonine kinase signaling pathway;GO:0009611//response to wounding;GO:0009612//response to mechanical stimulus;GO:0010551;GO:0016477//cell migration;GO:0016567/…	gi|153945765|ref|NP_005912.1|/0/1
MAP2K6	5608	1879	14.1776	67.1797	2.24442	Up	1.57555e-138	9.41232e-137	mitogen-activated protein kinase kinase 6	K04433	GO:0031981//nuclear lumen;GO:0044444//cytoplasmic part	GO:0004712//protein serine/threonine/tyrosine kinase activity;GO:0032559	GO:0000165//MAPK cascade;GO:0002224//toll-like receptor signaling pathway;GO:0006468//protein phosphorylation;GO:0006915//apoptotic process;GO:0006941//striated muscle contraction;GO:0007166//cell surface receptor signaling pathway;GO:0022402//cell cycle process;GO:0042221//response to chemical stimulus;GO:0045597//positive regulation of cell differentiation	gi|402900907|ref|XP_003913403.1|/0/1
CACHD1	57685	5274	0.827706	3.84319	2.21511	Up	3.02244e-23	2.84988e-22	cache domain containing 1	K04859	GO:0031224//intrinsic to membrane	-	GO:0070838//divalent metal ion transport	gi|158563905|sp|Q5VU97.2|CAHD1_HUMAN/0/1
NALCN	259232	6923	0.565882	2.55367	2.174	Up	5.02572e-20	4.13348e-19	sodium leak channel, non-selective	K05668;K04849	GO:0031224//intrinsic to membrane	GO:0005261//cation channel activity	GO:0030001//metal ion transport	gi|24119274|ref|NP_443099.1|/0/1
NFATC2	4773	7530	0.549995	2.30295	2.066	Up	1.56933e-18	1.20675e-17	nuclear factor of activated T-cells, cytoplasmic, calcineurin-dependent 2	K04446	GO:0005856//cytoskeleton;GO:0016020//membrane;GO:0031981//nuclear lumen;GO:0044444//cytoplasmic part	GO:0001071//nucleic acid binding transcription factor activity;GO:0003676//nucleic acid binding;GO:0030528//transcription regulator activity;GO:0043565//sequence-specific DNA binding	GO:0006351//transcription, DNA-dependent;GO:0006357//regulation of transcription from RNA polymerase II promoter;GO:0030888//regulation of B cell proliferation;GO:0032501//multicellular organismal process;GO:0033554//cellular response to stress;GO:0042221//response to chemical stimulus;GO:0050851//antigen receptor-mediated signaling pathway	gi|385137140|ref|NP_001245221.1|/0/1
RAC3	5881	1077	8.41824	28.0207	1.7349	Up	6.07864e-25	6.04867e-24	ras-related C3 botulinum toxin substrate 3 (rho family, small GTP binding protein Rac3)	K07861;K04392	GO:0005884//actin filament;GO:0016020//membrane;GO:0030427//site of polarized growth;GO:0031252//cell leading edge;GO:0042995//cell projection;GO:0044297//cell body;GO:0044444//cytoplasmic part	GO:0017111//nucleoside-triphosphatase activity;GO:0032561//guanyl ribonucleotide binding	GO:0007010//cytoskeleton organization;GO:0009207;GO:0009966//regulation of signal transduction;GO:0030030//cell projection organization;GO:0035556//intracellular signal transduction;GO:0050905//neuromuscular process	gi|297702070|ref|XP_002828022.1|/1.67081e-106/1
MAPK11	5600	2420	1.24882	3.95515	1.66317	Up	1.9547e-08	8.20765e-08	mitogen-activated protein kinase 11	K04441	GO:0000267//cell fraction;GO:0031981//nuclear lumen;GO:0044444//cytoplasmic part	GO:0004702//receptor signaling protein serine/threonine kinase activity;GO:0032559	GO:0000165//MAPK cascade;GO:0002224//toll-like receptor signaling pathway;GO:0006355//regulation of transcription, DNA-dependent;GO:0006464//cellular protein modification process;GO:0006796//phosphate-containing compound metabolic process;GO:0007169//transmembrane receptor protein tyrosine kinase signaling pathway;GO:0007264//small GTPase mediated signal transduction;GO:0045597//positive regulati…	gi|20128774|ref|NP_002742.3|/0/1
DUSP6	1848	2842	1.2997	4.08106	1.65077	Up	7.49934e-10	3.49969e-09	dual specificity phosphatase 6	K04459	GO:0031981//nuclear lumen;GO:0044444//cytoplasmic part	GO:0008138//protein tyrosine/serine/threonine phosphatase activity	GO:0001714//endodermal cell fate specification;GO:0001932//regulation of protein phosphorylation;GO:0002224//toll-like receptor signaling pathway;GO:0003002//regionalization;GO:0006470//protein dephosphorylation;GO:0006915//apoptotic process;GO:0008543//fibroblast growth factor receptor signaling pathway;GO:0010033//response to organic substance;GO:0043409//negative regulation of MAPK cascade;GO:…	gi|42764687|ref|NP_073143.2|/3.53614e-125/1
CASP3	836	2689	1.95641	6.03019	1.624	Up	5.91442e-13	3.40542e-12	caspase 3, apoptosis-related cysteine peptidase	K02187	GO:0016020//membrane;GO:0031981//nuclear lumen;GO:0044444//cytoplasmic part	GO:0004175//endopeptidase activity;GO:0005488//binding;GO:0016538//cyclin-dependent protein kinase regulator activity	GO:0000079//regulation of cyclin-dependent protein serine/threonine kinase activity;GO:0000737//DNA catabolic process, endonucleolytic;GO:0002260//lymphocyte homeostasis;GO:0006919//activation of cysteine-type endopeptidase activity involved in apoptotic process;GO:0007169//transmembrane receptor protein tyrosine kinase signaling pathway;GO:0008624;GO:0008629;GO:0008637//apoptotic mitochondrial c…	gi|397505966|ref|XP_003823509.1|/5.68245e-166/1
TGFBR3L	100507588	1256	1.96058	5.91717	1.59362	Up	1.65471e-06	5.84089e-06	transforming growth factor, beta receptor III-like	K15209;K04431;K05843	-	-	-	gi|305410860|ref|NP_001182188.1|/2.86275e-79/1
HSPA2	3306	2802	1.07857	3.09444	1.52056	Up	5.54968e-07	2.04216e-06	heat shock 70kDa protein 2	K03283	GO:0000794//condensed nuclear chromosome;GO:0043073//germ cell nucleus	GO:0005515//protein binding;GO:0008289//lipid binding;GO:0032559	GO:0006950//response to stress;GO:0007127//meiosis I;GO:0007281//germ cell development;GO:0031660//regulation of cyclin-dependent protein serine/threonine kinase activity involved in G2/M;GO:0048232//male gamete generation;GO:0070193//synaptonemal complex organization	gi|13676857|ref|NP_068814.2|/0/1
JUN	3725	3338	2.582	6.98302	1.43536	Up	2.95854e-15	1.92976e-14	jun proto-oncogene	K04448	GO:0000785//chromatin;GO:0031981//nuclear lumen;GO:0043234//protein complex;GO:0044444//cytoplasmic part	GO:0000981//sequence-specific DNA binding RNA polymerase II transcription factor activity;GO:0003712//transcription cofactor activity;GO:0005099//Ras GTPase activator activity;GO:0030528//transcription regulator activity;GO:0042802//identical protein binding;GO:0043565//sequence-specific DNA binding;GO:0043566//structure-specific DNA binding;GO:0046332//SMAD binding;GO:0046983//protein dimerizati…	GO:0000165//MAPK cascade;GO:0000302//response to reactive oxygen species;GO:0001933//negative regulation of protein phosphorylation;GO:0001935//endothelial cell proliferation;GO:0002224//toll-like receptor signaling pathway;GO:0002237//response to molecule of bacterial origin;GO:0002763//positive regulation of myeloid leukocyte differentiation;GO:0003007//heart morphogenesis;GO:0006275//regulatio…	gi|49456409|emb|CAG46525.1|/3.31753e-132/1
MAMDC4	158056	3669	0.518625	1.3811	1.41305	Up	0.000307618	0.000836834	MAM domain containing 4	K05119;K03173	GO:0031224//intrinsic to membrane	-	GO:0006810//transport	gi|119220585|ref|NP_996803.2|/0/1
DUSP9	1852	2394	3.36636	8.79583	1.38563	Up	2.82336e-13	1.65677e-12	dual specificity phosphatase 9	K04459	GO:0043231//intracellular membrane-bounded organelle;GO:0044444//cytoplasmic part	GO:0008138//protein tyrosine/serine/threonine phosphatase activity	GO:0000165//MAPK cascade;GO:0006464//cellular protein modification process	gi|441676045|ref|XP_004092643.1|/1.32835e-148/1
RALGPS1	9649	6342	0.511828	1.29615	1.34051	Up	9.3158e-06	3.04059e-05	Ral GEF with PH domain and SH3 binding motif 1	K04349;K12326;K03099	GO:0016020//membrane;GO:0044424//intracellular part	GO:0030695//GTPase regulator activity	GO:0035556//intracellular signal transduction	gi|40788221|dbj|BAA20808.2|/7.66115e-162/1
ARHGAP29	9411	9121	1.41126	3.43212	1.28211	Up	4.70848e-17	3.3383e-16	Rho GTPase activating protein 29	K10360;K04450;K02649	GO:0044444//cytoplasmic part	GO:0005099//Ras GTPase activator activity;GO:0043169//cation binding	GO:0007265//Ras protein signal transduction;GO:0009966//regulation of signal transduction	gi|134304853|ref|NP_004806.3|/0/1
SYNGAP1	8831	6011	0.875191	2.09812	1.26143	Up	1.5324e-07	5.9582e-07	synaptic Ras GTPase activating protein 1	K04352	GO:0005626//insoluble fraction;GO:0009898//internal side of plasma membrane;GO:0030425//dendrite;GO:0044424//intracellular part	GO:0005099//Ras GTPase activator activity;GO:0019904//protein domain specific binding	GO:0006915//apoptotic process;GO:0007172//signal complex assembly;GO:0007632//visual behavior;GO:0010627//regulation of intracellular protein kinase cascade;GO:0031175//neuron projection development;GO:0031345//negative regulation of cell projection organization;GO:0032313//regulation of Rab GTPase activity;GO:0048168//regulation of neuronal synaptic plasticity	gi|194248068|ref|NP_006763.2|/0/1
DUSP5	1847	2545	5.0578	11.6366	1.20209	Up	8.4553e-15	5.39808e-14	dual specificity phosphatase 5	K04459	GO:0031981//nuclear lumen	GO:0008138//protein tyrosine/serine/threonine phosphatase activity	GO:0000165//MAPK cascade;GO:0001704//formation of primary germ layer;GO:0006355//regulation of transcription, DNA-dependent;GO:0006464//cellular protein modification process	gi|119569944|gb|EAW49559.1|/0/1
RALGPS2	55103	5834	2.09128	4.72889	1.17712	Up	1.764e-13	1.04776e-12	Ral GEF with PH domain and SH3 binding motif 2	K04349	GO:0016020//membrane;GO:0044424//intracellular part	GO:0005488//binding;GO:0030695//GTPase regulator activity	GO:0019222//regulation of metabolic process;GO:0035556//intracellular signal transduction	gi|32441283|ref|NP_689876.2|/0/1
MAP4K3	8491	4362	2.59172	5.83421	1.17063	Up	1.89344e-12	1.05178e-11	mitogen-activated protein kinase kinase kinase kinase 3	K04406	-	GO:0004672//protein kinase activity;GO:0030695//GTPase regulator activity;GO:0032559	GO:0000165//MAPK cascade;GO:0006464//cellular protein modification process	gi|394025669|ref|NP_001257354.1|/0/1
PPM1B	5495	3850	4.76799	9.94438	1.0605	Up	1.45959e-15	9.73921e-15	protein phosphatase, Mg2+/Mn2+ dependent, 1B	K04461	GO:0043234//protein complex	GO:0004721//phosphoprotein phosphatase activity;GO:0046914//transition metal ion binding	GO:0006464//cellular protein modification process	gi|75813620|ref|NP_001028729.1|/0/1
NFKB1	4790	4093	11.8686	24.678	1.05608	Up	3.15326e-38	4.67564e-37	nuclear factor of kappa light polypeptide gene enhancer in B-cells 1	K02580	GO:0031981//nuclear lumen;GO:0043234//protein complex;GO:0044444//cytoplasmic part	GO:0001071//nucleic acid binding transcription factor activity;GO:0030528//transcription regulator activity;GO:0043565//sequence-specific DNA binding	GO:0000122//negative regulation of transcription from RNA polymerase II promoter;GO:0002224//toll-like receptor signaling pathway;GO:0007169//transmembrane receptor protein tyrosine kinase signaling pathway;GO:0009612//response to mechanical stimulus;GO:0010742//macrophage derived foam cell differentiation;GO:0010883//regulation of lipid storage;GO:0010894//negative regulation of steroid biosynth…	gi|397519725|ref|XP_003830004.1|/0/1
CHP1	11261	3230	90.758	185.503	1.03134	Up	1.56248e-209	1.53904e-207	calcineurin-like EF-hand protein 1	K06268	GO:0044444//cytoplasmic part	GO:0016247//channel regulator activity;GO:0046872//metal ion binding	GO:0006887//exocytosis;GO:0019932//second-messenger-mediated signaling;GO:0030001//metal ion transport	gi|6005731|ref|NP_009167.1|/1.26483e-104/1
TGFB3	7043	3183	1.47695	3.00706	1.02574	Up	0.000109234	0.000315682	transforming growth factor, beta 3	K13377	GO:0031091//platelet alpha granule;GO:0042383//sarcolemma;GO:0044297//cell body;GO:0044421//extracellular region part	GO:0005160//transforming growth factor beta receptor binding;GO:0019838//growth factor binding;GO:0046983//protein dimerization activity	GO:0000165//MAPK cascade;GO:0001666//response to hypoxia;GO:0001775//cell activation;GO:0001837//epithelial to mesenchymal transition;GO:0001934//positive regulation of protein phosphorylation;GO:0002719;GO:0003006//developmental process involved in reproduction;GO:0006275//regulation of DNA replication;GO:0006357//regulation of transcription from RNA polymerase II promoter;GO:0006887//exocytosis…	gi|471361101|ref|XP_004371116.1|/0/1
MAP4K2	5871	2971	8.4768	17.0936	1.01186	Up	9.04954e-19	7.03721e-18	mitogen-activated protein kinase kinase kinase kinase 2	K04414	GO:0000267//cell fraction;GO:0012505//endomembrane system;GO:0043231//intracellular membrane-bounded organelle;GO:0044459//plasma membrane part	GO:0004672//protein kinase activity;GO:0030695//GTPase regulator activity;GO:0032559	GO:0000165//MAPK cascade;GO:0002376//immune system process;GO:0006464//cellular protein modification process;GO:0016192//vesicle-mediated transport	gi|22035600|ref|NP_004570.2|/0/1
HSPA1L	3305	2550	1.668	3.35608	1.00866	Up	0.000310484	0.00084366	heat shock 70kDa protein 1-like	K03283	-	GO:0032559	GO:0006950//response to stress	gi|119623932|gb|EAX03527.1|/0/1
ILKAP	80895	1480	22.235	0.0760848	-8.19101	Down	1.12631e-86	3.82715e-85	integrin-linked kinase-associated serine/threonine phosphatase	K01090;K04457;K14803	GO:0043234//protein complex;GO:0044424//intracellular part	GO:0004721//phosphoprotein phosphatase activity;GO:0043169//cation binding	GO:0000084//S phase of mitotic cell cycle;GO:0006464//cellular protein modification process;GO:0006796//phosphate-containing compound metabolic process;GO:0051726//regulation of cell cycle	gi|13540531|ref|NP_110395.1|/0/1
ARHGAP32	9743	10111	2.31368	0.0222739	-6.6987	Down	1.27991e-59	2.95809e-58	Rho GTPase activating protein 32	K08878;K04450	GO:0012505//endomembrane system;GO:0030425//dendrite;GO:0031090//organelle membrane;GO:0043231//intracellular membrane-bounded organelle;GO:0044430//cytoskeletal part;GO:0044444//cytoplasmic part;GO:0044459//plasma membrane part	GO:0005543//phospholipid binding;GO:0008047//enzyme activator activity	GO:0009966//regulation of signal transduction;GO:0035556//intracellular signal transduction	gi|218083800|ref|NP_001136157.1|/0/1
PPM1L	151742	3056	0.769162	0.01	-6.26522	Down	5.09344e-07	1.88139e-06	protein phosphatase, Mg2+/Mn2+ dependent, 1L	K04461;K14803	GO:0031090//organelle membrane;GO:0031224//intrinsic to membrane;GO:0043234//protein complex	GO:0004721//phosphoprotein phosphatase activity;GO:0043169//cation binding	GO:0006464//cellular protein modification process;GO:0006643//membrane lipid metabolic process;GO:0006796//phosphate-containing compound metabolic process;GO:0007167//enzyme linked receptor protein signaling pathway;GO:0007243//intracellular protein kinase cascade	gi|63003905|ref|NP_640338.2|/0/1
CHN1	1123	2523	6.16665	0.446316	-3.78835	Down	2.60396e-30	3.13612e-29	chimerin 1	K10360;K13736;K04450;K02649	GO:0044444//cytoplasmic part	GO:0008047//enzyme activator activity;GO:0030674//protein binding, bridging;GO:0043169//cation binding	GO:0009966//regulation of signal transduction;GO:0035556//intracellular signal transduction;GO:0043087//regulation of GTPase activity	gi|62089162|dbj|BAD93025.1|/1.09217e-172/1
PRKCB	5579	8014	0.363141	0.0281022	-3.69178	Down	1.75134e-06	6.1636e-06	protein kinase C, beta	K02677	GO:0005626//insoluble fraction;GO:0005815//microtubule organizing center;GO:0005903//brush border;GO:0016020//membrane;GO:0043231//intracellular membrane-bounded organelle;GO:0044444//cytoplasmic part	GO:0003713//transcription coactivator activity;GO:0016247//channel regulator activity;GO:0019901//protein kinase binding;GO:0032559;GO:0035184//histone threonine kinase activity;GO:0035258//steroid hormone receptor binding;GO:0046914//transition metal ion binding	GO:0006875//cellular metal ion homeostasis;GO:0007249//I-kappaB kinase/NF-kappaB cascade;GO:0007267//cell-cell signaling;GO:0007599//hemostasis;GO:0010551;GO:0010646//regulation of cell communication;GO:0012501//programmed cell death;GO:0015031//protein transport;GO:0035405;GO:0042221//response to chemical stimulus;GO:0046649//lymphocyte activation;GO:0050851//antigen receptor-mediated signaling …	gi|47157322|ref|NP_997700.1|/0/1
PDGFRB	5159	5718	3.54312	0.315091	-3.49118	Down	1.28386e-36	1.81274e-35	platelet-derived growth factor receptor, beta polypeptide	K05089	GO:0016021//integral to membrane	GO:0004930//G-protein coupled receptor activity;GO:0005017//platelet-derived growth factor-activated receptor activity;GO:0019838//growth factor binding;GO:0032559;GO:0070851//growth factor receptor binding	GO:0001932//regulation of protein phosphorylation;GO:0006935//chemotaxis;GO:0007169//transmembrane receptor protein tyrosine kinase signaling pathway;GO:0008283//cell proliferation;GO:0009887//organ morphogenesis;GO:0016477//cell migration;GO:0035270//endocrine system development;GO:0043009//chordate embryonic development;GO:0048871//multicellular organismal homeostasis;GO:0060537//muscle tissue …	gi|4505683|ref|NP_002600.1|/0/1
EGFR	1956	5616	349.686	47.8413	-2.86973	Down	0	0	epidermal growth factor receptor	K04361	GO:0005635//nuclear envelope;GO:0030128//clathrin coat of endocytic vesicle;GO:0031224//intrinsic to membrane;GO:0044421//extracellular region part;GO:0044459//plasma membrane part	GO:0003779//actin binding;GO:0004709//MAP kinase kinase kinase activity;GO:0004714//transmembrane receptor protein tyrosine kinase activity;GO:0019902//phosphatase binding;GO:0030234//enzyme regulator activity;GO:0032559;GO:0043566//structure-specific DNA binding;GO:0046983//protein dimerization activity	GO:0006915//apoptotic process;GO:0006935//chemotaxis;GO:0007155//cell adhesion;GO:0007173//epidermal growth factor receptor signaling pathway;GO:0008284//positive regulation of cell proliferation;GO:0009411//response to UV;GO:0010740//positive regulation of intracellular protein kinase cascade;GO:0010863//positive regulation of phospholipase C activity;GO:0016477//cell migration;GO:0019722//calci…	gi|41327736|ref|NP_958441.1|/0/1
GADD45B	4616	1393	20.8114	3.15263	-2.72274	Down	5.84588e-41	9.16944e-40	growth arrest and DNA-damage-inducible, beta	K04402	-	-	GO:0000165//MAPK cascade;GO:0007049//cell cycle;GO:0012501//programmed cell death;GO:0032501//multicellular organismal process;GO:0033673//negative regulation of kinase activity;GO:0048869//cellular developmental process	gi|119589783|gb|EAW69377.1|/1.1337e-87/1
HSPA12A	259217	5739	3.1986	0.52977	-2.594	Down	3.45666e-25	3.46882e-24	heat shock 70kDa protein 12A	K03283	-	GO:0032559	-	gi|2887409|dbj|BAA24847.1|/0/1
FGFR3	2261	4310	3.09045	0.653164	-2.2423	Down	5.81726e-16	3.93879e-15	fibroblast growth factor receptor 3	K05094	GO:0000323//lytic vacuole;GO:0016021//integral to membrane;GO:0044421//extracellular region part;GO:0044459//plasma membrane part;GO:0045202//synapse	GO:0004714//transmembrane receptor protein tyrosine kinase activity;GO:0005102//receptor binding;GO:0005539//glycosaminoglycan binding;GO:0019838//growth factor binding;GO:0032559	GO:0000122//negative regulation of transcription from RNA polymerase II promoter;GO:0001503//ossification;GO:0001934//positive regulation of protein phosphorylation;GO:0001935//endothelial cell proliferation;GO:0001942//hair follicle development;GO:0002067;GO:0002088//lens development in camera-type eye;GO:0003151//outflow tract morphogenesis;GO:0006915//apoptotic process;GO:0007088//regulation o…	gi|4503711|ref|NP_000133.1|/0/1
TGFBR1	7046	6475	11.8414	3.47816	-1.76744	Down	2.38834e-62	5.79505e-61	transforming growth factor, beta receptor 1	K04674	GO:0031224//intrinsic to membrane;GO:0043235//receptor complex;GO:0044459//plasma membrane part	GO:0005024//transforming growth factor beta-activated receptor activity;GO:0005160//transforming growth factor beta receptor binding;GO:0019838//growth factor binding;GO:0019899//enzyme binding;GO:0032559;GO:0043169//cation binding;GO:0046332//SMAD binding;GO:0046983//protein dimerization activity	GO:0000165//MAPK cascade;GO:0001701//in utero embryonic development;GO:0001934//positive regulation of protein phosphorylation;GO:0003002//regionalization;GO:0006915//apoptotic process;GO:0006928//cellular component movement;GO:0006950//response to stress;GO:0007178//transmembrane receptor protein serine/threonine kinase signaling pathway;GO:0007276//gamete generation;GO:0008283//cell proliferati…	gi|402896861|ref|XP_003911501.1|/0/1
MAPT	4137	6816	3.57996	1.10689	-1.69343	Down	8.37572e-20	6.84451e-19	microtubule-associated protein tau	K04380	GO:0005930//axoneme;GO:0015630//microtubule cytoskeleton;GO:0016020//membrane;GO:0030426//growth cone;GO:0030427//site of polarized growth;GO:0031981//nuclear lumen;GO:0043005//neuron projection;GO:0043234//protein complex;GO:0044444//cytoplasmic part	GO:0005198//structural molecule activity;GO:0015631//tubulin binding;GO:0019900//kinase binding;GO:0019904//protein domain specific binding;GO:0034185//apolipoprotein binding;GO:0071814	GO:0006914//autophagy;GO:0006915//apoptotic process;GO:0007019//microtubule depolymerization;GO:0008344//adult locomotory behavior;GO:0010970//microtubule-based transport;GO:0016477//cell migration;GO:0022008//neurogenesis;GO:0030307//positive regulation of cell growth;GO:0031112;GO:0031667//response to nutrient levels;GO:0032386//regulation of intracellular transport;GO:0034621;GO:0034643//estab…	gi|8400715|ref|NP_058525.1|/2.03128e-145/1
PRKX	5613	6084	7.28547	2.46163	-1.56541	Down	3.5539e-31	4.4218e-30	protein kinase, X-linked	K04345	-	GO:0004690//cyclic nucleotide-dependent protein kinase activity;GO:0032559	GO:0006464//cellular protein modification process	gi|4826948|ref|NP_005035.1|/0/1
PLA2G3	50487	2593	3.45334	1.17252	-1.55838	Down	2.24824e-07	8.60205e-07	phospholipase A2, group III	K01047	GO:0005813//centrosome;GO:0016020//membrane;GO:0044421//extracellular region part	GO:0004623//phospholipase A2 activity;GO:0046872//metal ion binding	GO:0006629//lipid metabolic process;GO:0019637//organophosphate metabolic process;GO:0048858//cell projection morphogenesis	gi|426394164|ref|XP_004063371.1|/0/1
DUSP14	11072	1508	40.8238	13.889	-1.55547	Down	2.78006e-42	4.53693e-41	dual specificity phosphatase 14	K04459	-	GO:0008138//protein tyrosine/serine/threonine phosphatase activity	GO:0006470//protein dephosphorylation	gi|5902002|ref|NP_008957.1|/1.92599e-112/1
TNFRSF1A	7132	2258	110.494	43.8353	-1.3338	Down	4.4245e-132	2.46521e-130	tumor necrosis factor receptor superfamily, member 1A	K03158	GO:0016021//integral to membrane;GO:0032991//macromolecular complex	GO:0005035//death receptor activity;GO:0005515//protein binding	GO:0002237//response to molecule of bacterial origin;GO:0006357//regulation of transcription from RNA polymerase II promoter;GO:0006692;GO:0006917//induction of apoptosis;GO:0007249//I-kappaB kinase/NF-kappaB cascade;GO:0009612//response to mechanical stimulus;GO:0019221//cytokine-mediated signaling pathway;GO:0031349//positive regulation of defense response;GO:0045765//regulation of angiogenesis…	gi|189054907|dbj|BAG37891.1|/0/1
NLK	51701	3555	6.76941	2.78742	-1.2801	Down	2.0808e-13	1.23019e-12	nemo-like kinase	K04468	GO:0043231//intracellular membrane-bounded organelle	GO:0004702//receptor signaling protein serine/threonine kinase activity;GO:0019899//enzyme binding;GO:0019904//protein domain specific binding;GO:0032559;GO:0046872//metal ion binding	GO:0006351//transcription, DNA-dependent;GO:0007178//transmembrane receptor protein serine/threonine kinase signaling pathway;GO:0016055//Wnt receptor signaling pathway;GO:0042501//serine phosphorylation of STAT protein	gi|211828675|gb|AAH64663.2|/0/1
SYDE1	85360	3254	41.9657	17.5795	-1.25532	Down	9.8495e-67	2.61201e-65	synapse defective 1, Rho GTPase, homolog 1 (C. elegans)	K08878;K04450	GO:0044444//cytoplasmic part	GO:0005099//Ras GTPase activator activity	GO:0032321//positive regulation of Rho GTPase activity	gi|42475970|ref|NP_149014.3|/0/1
MAP4K4	9448	7658	24.8623	10.4548	-1.2498	Down	1.06715e-91	3.88116e-90	mitogen-activated protein kinase kinase kinase kinase 4	K04407	GO:0044424//intracellular part	GO:0004672//protein kinase activity;GO:0030695//GTPase regulator activity;GO:0032559	GO:0006464//cellular protein modification process;GO:0006796//phosphate-containing compound metabolic process;GO:0019222//regulation of metabolic process;GO:0043408//regulation of MAPK cascade	gi|336020360|ref|NP_001229489.1|/0/1
FGFRL1	53834	3215	16.9899	7.25018	-1.22859	Down	7.70404e-27	8.1409e-26	fibroblast growth factor receptor-like 1	K01217;K05095;K05094	GO:0030133//transport vesicle;GO:0031224//intrinsic to membrane	GO:0004714//transmembrane receptor protein tyrosine kinase activity;GO:0005539//glycosaminoglycan binding;GO:0019838//growth factor binding	GO:0003170//heart valve development;GO:0007169//transmembrane receptor protein tyrosine kinase signaling pathway;GO:0008283//cell proliferation;GO:0016049//cell growth;GO:0060411//cardiac septum morphogenesis;GO:0060538//skeletal muscle organ development	gi|51988910|ref|NP_068742.2|/0/1
ARRB1	408	7539	7.55711	3.27107	-1.20807	Down	3.09e-27	3.31604e-26	arrestin, beta 1	K04439	GO:0005626//insoluble fraction;GO:0005764//lysosome;GO:0012506//vesicle membrane;GO:0031234//extrinsic to internal side of plasma membrane;GO:0031410//cytoplasmic vesicle;GO:0042995//cell projection;GO:0044427//chromosomal part	GO:0001664//G-protein coupled receptor binding;GO:0004468//lysine N-acetyltransferase activity;GO:0008047//enzyme activator activity;GO:0019899//enzyme binding;GO:0043565//sequence-specific DNA binding	GO:0001541//ovarian follicle development;GO:0001775//cell activation;GO:0001818//negative regulation of cytokine production;GO:0002029//desensitization of G-protein coupled receptor protein signaling pathway;GO:0006171//cAMP biosynthetic process;GO:0006198//cAMP catabolic process;GO:0006511//ubiquitin-dependent protein catabolic process;GO:0007187//G-protein coupled receptor signaling pathway, co…	gi|3514099|gb|AAC34123.1|/0/1
ARHGAP23	57636	5913	27.2588	11.9785	-1.18627	Down	6.7085e-72	1.91731e-70	Rho GTPase activating protein 23	K08878;K05732;K04450;K07526	GO:0044464//cell part	GO:0008047//enzyme activator activity	GO:0023052//signaling	gi|313661470|ref|NP_001186346.1|/0/1
ZAK	51776	7194	11.2492	5.08713	-1.14489	Down	5.057e-35	6.89318e-34	sterile alpha motif and leucine zipper containing kinase AZK	K04424	GO:0043231//intracellular membrane-bounded organelle	GO:0004702//receptor signaling protein serine/threonine kinase activity;GO:0005515//protein binding;GO:0032559;GO:0046872//metal ion binding	GO:0000187//activation of MAPK activity;GO:0006464//cellular protein modification process;GO:0006796//phosphate-containing compound metabolic process;GO:0006915//apoptotic process;GO:0006974//response to DNA damage stimulus;GO:0006996//organelle organization;GO:0007050//cell cycle arrest;GO:0009628//response to abiotic stimulus;GO:0035556//intracellular signal transduction;GO:0048869//cellular de…	gi|62087528|dbj|BAD92211.1|/0/1
PLA2G4C	8605	2567	2.79065	1.27213	-1.13336	Down	0.000292658	0.000799291	phospholipase A2, group IVC (cytosolic, calcium-independent)	K01047	GO:0044444//cytoplasmic part	GO:0004623//phospholipase A2 activity;GO:0008289//lipid binding	GO:0000038//very long-chain fatty acid metabolic process;GO:0006650//glycerophospholipid metabolic process;GO:0006952//defense response;GO:0007165//signal transduction;GO:0022414//reproductive process	gi|226693357|ref|NP_001152794.1|/0/1
TP53	7157	2724	79.182	36.8737	-1.10258	Down	3.25004e-85	1.07779e-83	tumor protein p53	K04451	GO:0000267//cell fraction;GO:0005667//transcription factor complex;GO:0016604//nuclear body;GO:0034399//nuclear periphery;GO:0044427//chromosomal part;GO:0044444//cytoplasmic part	GO:0001071//nucleic acid binding transcription factor activity;GO:0003690//double-stranded DNA binding;GO:0016564//transcription repressor activity;GO:0019900//kinase binding;GO:0019903//protein phosphatase binding;GO:0032559;GO:0043565//sequence-specific DNA binding;GO:0046914//transition metal ion binding;GO:0046983//protein dimerization activity	GO:0000077//DNA damage checkpoint;GO:0000122//negative regulation of transcription from RNA polymerase II promoter;GO:0001934//positive regulation of protein phosphorylation;GO:0006281//DNA repair;GO:0006919//activation of cysteine-type endopeptidase activity involved in apoptotic process;GO:0006984//ER-nucleus signaling pathway;GO:0007006//mitochondrial membrane organization;GO:0007264//small GT…	gi|75914681|gb|ABA29753.1|/0/1
MKNK1	8569	2827	18.1735	8.60374	-1.0788	Down	7.02376e-21	5.99738e-20	MAP kinase interacting serine/threonine kinase 1	K04372	GO:0043231//intracellular membrane-bounded organelle	GO:0004672//protein kinase activity;GO:0032559	GO:0006412//translation;GO:0006468//protein phosphorylation;GO:0035556//intracellular signal transduction	gi|397483191|ref|XP_003812787.1|/0/1
④Phosphatidylinositol signaling pathway
Symbol	GeneID	Gene_length	shNC-RPKM	shNrf1-RPKM	log2 Ratio(shNrf1/shNC)	Up-Down-Regulation(shNrf1/shNC)	P-value	FDR	Description	KEGG Orthology	GO Component	GO Function	GO Process	Blast nr
PLCE1	51196	7992	0.01	0.507232	5.66457	Up	1.30199e-11	6.84629e-11	phospholipase C, epsilon 1	K05860	GO:0005626//insoluble fraction;GO:0012505//endomembrane system;GO:0016020//membrane;GO:0043231//intracellular membrane-bounded organelle;GO:0044444//cytoplasmic part	GO:0004629//phospholipase C activity;GO:0004871//signal transducer activity;GO:0030695//GTPase regulator activity;GO:0031267//small GTPase binding;GO:0046872//metal ion binding	GO:0000165//MAPK cascade;GO:0001932//regulation of protein phosphorylation;GO:0006937//regulation of muscle contraction;GO:0006996//organelle organization;GO:0007169//transmembrane receptor protein tyrosine kinase signaling pathway;GO:0007186//G-protein coupled receptor signaling pathway;GO:0016049//cell growth;GO:0019637//organophosphate metabolic process;GO:0019932//second-messenger-mediated si…	gi|34303900|dbj|BAA96040.2|/0/1
PLCB2	5330	4694	0.190765	3.04663	3.99735	Up	4.01146e-29	4.62912e-28	phospholipase C, beta 2	K05858	GO:0016020//membrane;GO:0043231//intracellular membrane-bounded organelle;GO:0044444//cytoplasmic part	GO:0004629//phospholipase C activity;GO:0008289//lipid binding;GO:0046872//metal ion binding;GO:0060089	GO:0006629//lipid metabolic process;GO:0007165//signal transduction;GO:0007267//cell-cell signaling;GO:0010863//positive regulation of phospholipase C activity;GO:0019637//organophosphate metabolic process;GO:0050912//detection of chemical stimulus involved in sensory perception of taste	gi|95147333|ref|NP_004564.2|/0/1
MDK	4192	1194	0.656214	3.0179	2.20131	Up	3.90404e-05	0.000118496	midkine (neurite growth-promoting factor 2)	K06828;K00901	-	GO:0005102//receptor binding;GO:0005539//glycosaminoglycan binding	GO:0006950//response to stress;GO:0023052//signaling;GO:0035270//endocrine system development;GO:0048522//positive regulation of cellular process;GO:0048869//cellular developmental process	gi|84311247|gb|ABC55426.1|/2.65647e-71/1
METRNL	284207	1348	9.96422	34.2494	1.78125	Up	1.18144e-38	1.76928e-37	meteorin, glial cell differentiation regulator-like	K00901	-	-	-	gi|52345387|ref|NP_001004431.1|/2.60131e-158/1
ITPKC	80271	3398	1.67996	5.00395	1.57464	Up	5.45226e-13	3.14369e-12	inositol-trisphosphate 3-kinase C	K00911	GO:0043231//intracellular membrane-bounded organelle	GO:0005515//protein binding;GO:0032559;GO:0051766//inositol trisphosphate kinase activity	-	gi|18643383|ref|NP_079470.1|/0/1
ARHGAP29	9411	9121	1.41126	3.43212	1.28211	Up	4.70848e-17	3.3383e-16	Rho GTPase activating protein 29	K10360;K04450;K02649	GO:0044444//cytoplasmic part	GO:0005099//Ras GTPase activator activity;GO:0043169//cation binding	GO:0007265//Ras protein signal transduction;GO:0009966//regulation of signal transduction	gi|134304853|ref|NP_004806.3|/0/1
INPPL1	3636	4726	35.9526	83.2032	1.21054	Up	2.2221e-178	1.8478e-176	inositol polyphosphate phosphatase-like 1	K15909	GO:0016020//membrane;GO:0030864//cortical actin cytoskeleton;GO:0031252//cell leading edge	GO:0008092//cytoskeletal protein binding;GO:0019904//protein domain specific binding;GO:0035091//phosphatidylinositol binding;GO:0046030//inositol trisphosphate phosphatase activity	GO:0006260//DNA replication;GO:0006629//lipid metabolic process;GO:0007417//central nervous system development;GO:0008283//cell proliferation;GO:0009968//negative regulation of signal transduction;GO:0010467//gene expression;GO:0010975//regulation of neuron projection development;GO:0016192//vesicle-mediated transport;GO:0019318//hexose metabolic process;GO:0030036//actin cytoskeleton organizatio…	gi|222136583|ref|NP_001558.3|/0/1
PITPNC1	26207	6383	1.70098	3.86348	1.18354	Up	2.6988e-12	1.48717e-11	phosphatidylinositol transfer protein, cytoplasmic 1	K01106	GO:0043231//intracellular membrane-bounded organelle	GO:0005488//binding;GO:0005548//phospholipid transporter activity	GO:0006650//glycerophospholipid metabolic process;GO:0010876//lipid localization;GO:0023052//signaling;GO:0051234//establishment of localization	gi|32307142|ref|NP_858057.1|/1.28684e-159/1
METRN	79006	1109	8.57905	18.4799	1.10707	Up	1.54221e-09	7.03236e-09	meteorin, glial cell differentiation regulator	K00901	GO:0044421//extracellular region part	-	GO:0030154//cell differentiation;GO:0031346//positive regulation of cell projection organization;GO:0048731	gi|13129000|ref|NP_076947.1|/1.5214e-134/1
PIK3C2B	5287	7606	13.7891	28.9286	1.06897	Up	8.77284e-83	2.82988e-81	phosphatidylinositol-4-phosphate 3-kinase, catalytic subunit type 2 beta	K00923	GO:0016020//membrane;GO:0016023//cytoplasmic membrane-bounded vesicle;GO:0042598;GO:0043234//protein complex	GO:0005543//phospholipid binding;GO:0016307//phosphatidylinositol phosphate kinase activity;GO:0032559;GO:0035004//phosphatidylinositol 3-kinase activity	GO:0007243//intracellular protein kinase cascade;GO:0046488//phosphatidylinositol metabolic process;GO:0048017//inositol lipid-mediated signaling	gi|68533067|dbj|BAE06088.1|/0/1
TNS1	7145	10276	18.3865	0.120539	-7.25301	Down	0	0	tensin 1	K00665;K01110;K08855	GO:0005924//cell-substrate adherens junction;GO:0043232	GO:0008092//cytoskeletal protein binding	-	gi|397495609|ref|XP_003818640.1|/0/1
PIP5K1B	8395	2654	0.590444	0.01	-5.88373	Down	6.38422e-05	0.000189534	phosphatidylinositol-4-phosphate 5-kinase, type I, beta	K00889	GO:0031254//trailing edge	GO:0016307//phosphatidylinositol phosphate kinase activity;GO:0032559	GO:0006796//phosphate-containing compound metabolic process;GO:0046488//phosphatidylinositol metabolic process	gi|4505817|ref|NP_003549.1|/0/1
SHROOM2	357	7445	0.390895	0.01	-5.28871	Down	1.61574e-08	6.82594e-08	shroom family member 2	K05868;K00901;K13172	GO:0005884//actin filament;GO:0015630//microtubule cytoskeleton;GO:0043296//apical junction complex;GO:0044297//cell body;GO:0044444//cytoplasmic part	GO:0003779//actin binding;GO:0005272//sodium channel activity	GO:0002088//lens development in camera-type eye;GO:0007417//central nervous system development;GO:0008105//asymmetric protein localization;GO:0030042//actin filament depolymerization;GO:0032400//melanosome localization;GO:0032989;GO:0034331;GO:0048592//eye morphogenesis;GO:0048753//pigment granule organization;GO:0048870//cell motility	gi|4502175|ref|NP_001640.1|/0/1
PLCB1	23236	7221	0.263514	0.01	-4.71981	Down	8.05236e-06	2.64543e-05	phospholipase C, beta 1 (phosphoinositide-specific)	K05858	GO:0000785//chromatin;GO:0005626//insoluble fraction;GO:0016604//nuclear body;GO:0044444//cytoplasmic part	GO:0004629//phospholipase C activity;GO:0008047//enzyme activator activity;GO:0030528//transcription regulator activity;GO:0035091//phosphatidylinositol binding;GO:0042802//identical protein binding;GO:0046872//metal ion binding;GO:0060089	GO:0001819//positive regulation of cytokine production;GO:0002573//myeloid leukocyte differentiation;GO:0006650//glycerophospholipid metabolic process;GO:0007169//transmembrane receptor protein tyrosine kinase signaling pathway;GO:0007186//G-protein coupled receptor signaling pathway;GO:0007267//cell-cell signaling;GO:0007340//acrosome reaction;GO:0007611//learning or memory;GO:0009101//glycoprot…	gi|58257731|dbj|BAA25507.3|/0/1
PLCB4	5332	5640	3.49289	0.199655	-4.12884	Down	2.01014e-40	3.11167e-39	phospholipase C, beta 4	K05858	GO:0005783//endoplasmic reticulum;GO:0042598;GO:0043005//neuron projection;GO:0044430//cytoskeletal part;GO:0044444//cytoplasmic part	GO:0004629//phospholipase C activity;GO:0019901//protein kinase binding;GO:0046872//metal ion binding;GO:0060089	GO:0006629//lipid metabolic process;GO:0006813//potassium ion transport;GO:0007165//signal transduction	gi|289547594|ref|NP_001166117.1|/0/1
CHN1	1123	2523	6.16665	0.446316	-3.78835	Down	2.60396e-30	3.13612e-29	chimerin 1	K10360;K13736;K04450;K02649	GO:0044444//cytoplasmic part	GO:0008047//enzyme activator activity;GO:0030674//protein binding, bridging;GO:0043169//cation binding	GO:0009966//regulation of signal transduction;GO:0035556//intracellular signal transduction;GO:0043087//regulation of GTPase activity	gi|62089162|dbj|BAD93025.1|/1.09217e-172/1
PRKCB	5579	8014	0.363141	0.0281022	-3.69178	Down	1.75134e-06	6.1636e-06	protein kinase C, beta	K02677	GO:0005626//insoluble fraction;GO:0005815//microtubule organizing center;GO:0005903//brush border;GO:0016020//membrane;GO:0043231//intracellular membrane-bounded organelle;GO:0044444//cytoplasmic part	GO:0003713//transcription coactivator activity;GO:0016247//channel regulator activity;GO:0019901//protein kinase binding;GO:0032559;GO:0035184//histone threonine kinase activity;GO:0035258//steroid hormone receptor binding;GO:0046914//transition metal ion binding	GO:0006875//cellular metal ion homeostasis;GO:0007249//I-kappaB kinase/NF-kappaB cascade;GO:0007267//cell-cell signaling;GO:0007599//hemostasis;GO:0010551;GO:0010646//regulation of cell communication;GO:0012501//programmed cell death;GO:0015031//protein transport;GO:0035405;GO:0042221//response to chemical stimulus;GO:0046649//lymphocyte activation;GO:0050851//antigen receptor-mediated signaling …	gi|47157322|ref|NP_997700.1|/0/1
PIK3R1	5295	6991	0.736496	0.0644288	-3.5149	Down	2.75006e-10	1.32445e-09	phosphoinositide-3-kinase, regulatory subunit 1 (alpha)	K02649	GO:0005624//membrane fraction;GO:0005942//phosphatidylinositol 3-kinase complex;GO:0016020//membrane;GO:0043231//intracellular membrane-bounded organelle	GO:0017046//peptide hormone binding;GO:0019900//kinase binding;GO:0019902//phosphatase binding;GO:0035004//phosphatidylinositol 3-kinase activity;GO:0035014//phosphatidylinositol 3-kinase regulator activity;GO:0035091//phosphatidylinositol binding;GO:0035258//steroid hormone receptor binding;GO:0070851//growth factor receptor binding	GO:0001101//response to acid;GO:0001932//regulation of protein phosphorylation;GO:0001952//regulation of cell-matrix adhesion;GO:0002027//regulation of heart rate;GO:0002762//negative regulation of myeloid leukocyte differentiation;GO:0006357//regulation of transcription from RNA polymerase II promoter;GO:0007162//negative regulation of cell adhesion;GO:0007169//transmembrane receptor protein tyr…	gi|32455252|ref|NP_852556.2|/0/1
CDS1	1040	4546	0.443195	0.0495405	-3.16126	Down	0.000232954	0.000644528	CDP-diacylglycerol synthase (phosphatidate cytidylyltransferase) 1	K00981	GO:0031090//organelle membrane;GO:0031224//intrinsic to membrane;GO:0043231//intracellular membrane-bounded organelle	GO:0017169//CDP-alcohol phosphatidyltransferase activity;GO:0070567	GO:0006651//diacylglycerol biosynthetic process;GO:0006656//phosphatidylcholine biosynthetic process;GO:0023052//signaling;GO:0050953//sensory perception of light stimulus	gi|22035624|ref|NP_001254.2|/0/1
INPP5J	27124	2238	4.75133	0.805044	-2.56119	Down	5.56976e-15	3.59051e-14	inositol polyphosphate-5-phosphatase J	K01106	GO:0016020//membrane;GO:0030425//dendrite;GO:0030427//site of polarized growth;GO:0031252//cell leading edge;GO:0044424//intracellular part	GO:0019904//protein domain specific binding;GO:0034594//phosphatidylinositol trisphosphate phosphatase activity;GO:0046030//inositol trisphosphate phosphatase activity	GO:0001933//negative regulation of protein phosphorylation;GO:0010975//regulation of neuron projection development;GO:0031111//negative regulation of microtubule polymerization or depolymerization	gi|50726960|ref|NP_001002837.1|/0/1
DGKD	8527	6294	20.2202	3.72131	-2.44191	Down	3.45414e-154	2.46375e-152	diacylglycerol kinase, delta 130kDa	K00901	GO:0016020//membrane;GO:0031410//cytoplasmic vesicle	GO:0008289//lipid binding;GO:0016301//kinase activity;GO:0032559;GO:0042802//identical protein binding;GO:0043169//cation binding;GO:0046983//protein dimerization activity	GO:0001775//cell activation;GO:0006639//acylglycerol metabolic process;GO:0007169//transmembrane receptor protein tyrosine kinase signaling pathway;GO:0007186//G-protein coupled receptor signaling pathway;GO:0007599//hemostasis;GO:0016192//vesicle-mediated transport;GO:0035556//intracellular signal transduction;GO:0040007//growth;GO:0042221//response to chemical stimulus;GO:0051259//protein oligo…	gi|71891743|dbj|BAA09766.3|/0/1
PTEN	5728	5572	16.7535	3.51639	-2.2523	Down	3.21642e-103	1.31746e-101	phosphatase and tensin homolog	K01110	GO:0005624//membrane fraction;GO:0016604//nuclear body;GO:0030425//dendrite;GO:0044444//cytoplasmic part;GO:0044459//plasma membrane part	GO:0004721//phosphoprotein phosphatase activity;GO:0019904//protein domain specific binding;GO:0034593//phosphatidylinositol bisphosphate phosphatase activity;GO:0034594//phosphatidylinositol trisphosphate phosphatase activity;GO:0046872//metal ion binding;GO:0070851//growth factor receptor binding	GO:0001783//B cell apoptotic process;GO:0001932//regulation of protein phosphorylation;GO:0001953//negative regulation of cell-matrix adhesion;GO:0003006//developmental process involved in reproduction;GO:0006470//protein dephosphorylation;GO:0007169//transmembrane receptor protein tyrosine kinase signaling pathway;GO:0007611//learning or memory;GO:0008285//negative regulation of cell proliferati…	gi|441642378|ref|XP_003262607.2|/0/1
INPP5K	51763	3391	12.4111	4.74862	-1.38606	Down	4.97482e-25	4.96821e-24	inositol polyphosphate-5-phosphatase K	K01106	GO:0005626//insoluble fraction;GO:0031252//cell leading edge;GO:0042995//cell projection;GO:0043231//intracellular membrane-bounded organelle;GO:0044444//cytoplasmic part	GO:0005488//binding;GO:0046030//inositol trisphosphate phosphatase activity	GO:0007010//cytoskeleton organization	gi|18765709|ref|NP_057616.2|/0/1
PLCD3	113026	3477	132.244	59.0717	-1.16267	Down	2.8188e-195	2.56294e-193	phospholipase C, delta 3	K05857	GO:0032155;GO:0044424//intracellular part	GO:0004629//phospholipase C activity;GO:0046872//metal ion binding;GO:0060089	GO:0006629//lipid metabolic process;GO:0007165//signal transduction;GO:0008283//cell proliferation;GO:0048568//embryonic organ development;GO:0048646//anatomical structure formation involved in morphogenesis	gi|19115964|ref|NP_588614.1|/0/1
IMPA1	3612	3597	4.44987	2.00354	-1.15121	Down	3.75298e-08	1.5399e-07	inositol(myo)-1(or 4)-monophosphatase 1	K01092	GO:0043005//neuron projection;GO:0044297//cell body;GO:0044424//intracellular part	GO:0004437//inositol or phosphatidylinositol phosphatase activity;GO:0042802//identical protein binding;GO:0043169//cation binding	GO:0010038//response to metal ion;GO:0023052//signaling;GO:0046474//glycerophospholipid biosynthetic process;GO:0046838//phosphorylated carbohydrate dephosphorylation	gi|221625487|ref|NP_001138350.1|/5.45738e-134/1
IPPK	64768	4401	6.20569	2.84008	-1.12766	Down	1.4658e-12	8.20847e-12	inositol 1,3,4,5,6-pentakisphosphate 2-kinase	K10572	GO:0043231//intracellular membrane-bounded organelle	GO:0004428//inositol or phosphatidylinositol kinase activity;GO:0032559	GO:0006020//inositol metabolic process	gi|332222752|ref|XP_003260534.1|/0/1
PI4K2A	55361	4185	23.5898	10.8166	-1.12492	Down	3.1997e-41	5.06201e-40	phosphatidylinositol 4-kinase type 2 alpha	K13711	GO:0005769//early endosome;GO:0008021//synaptic vesicle;GO:0016021//integral to membrane;GO:0030133//transport vesicle;GO:0032991//macromolecular complex;GO:0042598;GO:0043025//neuronal cell body	GO:0001727//lipid kinase activity;GO:0005515//protein binding;GO:0032559;GO:0046872//metal ion binding	GO:0002276;GO:0006796//phosphate-containing compound metabolic process;GO:0046474//glycerophospholipid biosynthetic process;GO:0046488//phosphatidylinositol metabolic process	gi|13559514|ref|NP_060895.1|/0/1
IMPAD1	54928	7242	22.7047	10.7132	-1.0836	Down	1.24294e-63	3.10698e-62	inositol monophosphatase domain containing 1	K15759	GO:0031224//intrinsic to membrane;GO:0043231//intracellular membrane-bounded organelle	GO:0004437//inositol or phosphatidylinositol phosphatase activity;GO:0008252//nucleotidase activity;GO:0043169//cation binding	GO:0001503//ossification;GO:0002062//chondrocyte differentiation;GO:0006790//sulfur compound metabolic process;GO:0006796//phosphate-containing compound metabolic process;GO:0030326//embryonic limb morphogenesis	gi|332213862|ref|XP_003256050.1|/0/1
IMPA2	3613	1537	176.6	84.7655	-1.05893	Down	4.3622e-100	1.73941e-98	inositol(myo)-1(or 4)-monophosphatase 2	K01092	GO:0044424//intracellular part	GO:0004437//inositol or phosphatidylinositol phosphatase activity;GO:0042802//identical protein binding;GO:0043169//cation binding	GO:0019751//polyol metabolic process;GO:0023052//signaling;GO:0046838//phosphorylated carbohydrate dephosphorylation	gi|112490221|pdb|2CZH|A/2.45626e-163/1
④Insulin signaling pathway
Symbol	GeneID	Gene_length	shNC-RPKM	shNrf1-RPKM	log2 Ratio(shNrf1/shNC)	Up-Down-Regulation(shNrf1/shNC)	P-value	FDR	Description	KEGG Orthology	GO Component	GO Function	GO Process	Blast nr
RASGEF1B	153020	2269	0.01	1.14144	6.83471	Up	1.1091e-07	4.37194e-07	RasGEF domain family, member 1B	K07376;K06277;K08018	GO:0044464//cell part	GO:0005083//small GTPase regulator activity	GO:0009966//regulation of signal transduction	gi|22749129|ref|NP_689758.1|/0/1
LIPE	3991	3806	0.970503	18.4027	4.24504	Up	5.51942e-143	3.45967e-141	lipase, hormone-sensitive	K07188	GO:0044421//extracellular region part;GO:0044444//cytoplasmic part;GO:0044459//plasma membrane part	GO:0004091//carboxylesterase activity;GO:0005488//binding	GO:0006464//cellular protein modification process;GO:0006641//triglyceride metabolic process;GO:0016125//sterol metabolic process;GO:0022414//reproductive process;GO:0042221//response to chemical stimulus;GO:0046339//diacylglycerol metabolic process	gi|397481120|ref|XP_003811803.1|/0/1
HKDC1	80201	3719	0.541749	5.329	3.29817	Up	3.16976e-34	4.2301e-33	hexokinase domain containing 1	K00844	GO:0031981//nuclear lumen	GO:0016773//phosphotransferase activity, alcohol group as acceptor;GO:0032559	GO:0006007//glucose catabolic process	gi|83404999|gb|AAI10505.1|/0/1
PRKCZ	5590	2359	4.46017	17.4231	1.96583	Up	2.64682e-39	3.9854e-38	protein kinase C, zeta	K06069	GO:0005884//actin filament;GO:0012505//endomembrane system;GO:0034399//nuclear periphery;GO:0042598;GO:0043296//apical junction complex;GO:0044448//cell cortex part	GO:0004674//protein serine/threonine kinase activity;GO:0016247//channel regulator activity;GO:0019900//kinase binding;GO:0032559;GO:0046914//transition metal ion binding	GO:0001775//cell activation;GO:0001933//negative regulation of protein phosphorylation;GO:0001952//regulation of cell-matrix adhesion;GO:0007169//transmembrane receptor protein tyrosine kinase signaling pathway;GO:0007599//hemostasis;GO:0007613//memory;GO:0008283//cell proliferation;GO:0009968//negative regulation of signal transduction;GO:0010518//positive regulation of phospholipase activity;GO…	gi|52486327|ref|NP_002735.3|/0/1
MAFIP	727764	2758	1.09577	3.22546	1.55756	Up	2.44608e-07	9.31593e-07	MAFF interacting protein (pseudogene)	K04688	GO:0005930//axoneme;GO:0015630//microtubule cytoskeleton	-	GO:0007010//cytoskeleton organization	gi|74356358|gb|AAI04659.1|/2.41354e-114/1
RHOQ	23433	4542	4.26335	11.8754	1.47792	Up	1.0642e-34	1.4329e-33	ras homolog family member Q	K07194	GO:0015629//actin cytoskeleton;GO:0044425//membrane part;GO:0044444//cytoplasmic part	GO:0017111//nucleoside-triphosphatase activity;GO:0019904//protein domain specific binding;GO:0032561//guanyl ribonucleotide binding	GO:0007169//transmembrane receptor protein tyrosine kinase signaling pathway;GO:0009207;GO:0009966//regulation of signal transduction;GO:0010551;GO:0010828//positive regulation of glucose transport;GO:0010829//negative regulation of glucose transport;GO:0030036//actin cytoskeleton organization;GO:0031346//positive regulation of cell projection organization;GO:0032868//response to insulin stimulus…	gi|395731858|ref|XP_002812107.2|/3.34069e-122/1
NEBL	10529	9231	0.388019	1.00029	1.36621	Up	1.8456e-06	6.47604e-06	nebulette	K06106;K06086	-	GO:0005198//structural molecule activity;GO:0008092//cytoskeletal protein binding;GO:0046914//transition metal ion binding	GO:0032535//regulation of cellular component size	gi|62088202|dbj|BAD92548.1|/8.52124e-173/1
RALGPS1	9649	6342	0.511828	1.29615	1.34051	Up	9.3158e-06	3.04059e-05	Ral GEF with PH domain and SH3 binding motif 1	K04349;K12326;K03099	GO:0016020//membrane;GO:0044424//intracellular part	GO:0030695//GTPase regulator activity	GO:0035556//intracellular signal transduction	gi|40788221|dbj|BAA20808.2|/7.66115e-162/1
PRKAB2	5565	5431	3.25634	8.2106	1.33424	Up	4.8094e-25	4.80882e-24	protein kinase, AMP-activated, beta 2 non-catalytic subunit	K07199	GO:0031981//nuclear lumen;GO:0043234//protein complex;GO:0044444//cytoplasmic part	GO:0016772//transferase activity, transferring phosphorus-containing groups;GO:0019900//kinase binding	GO:0003333//amino acid transmembrane transport;GO:0006633//fatty acid biosynthetic process;GO:0006796//phosphate-containing compound metabolic process;GO:0007169//transmembrane receptor protein tyrosine kinase signaling pathway;GO:0015980//energy derivation by oxidation of organic compounds;GO:0019217//regulation of fatty acid metabolic process;GO:0022402//cell cycle process	gi|4885561|ref|NP_005390.1|/6.17692e-147/1
ARHGAP29	9411	9121	1.41126	3.43212	1.28211	Up	4.70848e-17	3.3383e-16	Rho GTPase activating protein 29	K10360;K04450;K02649	GO:0044444//cytoplasmic part	GO:0005099//Ras GTPase activator activity;GO:0043169//cation binding	GO:0007265//Ras protein signal transduction;GO:0009966//regulation of signal transduction	gi|134304853|ref|NP_004806.3|/0/1
NINL	22981	4979	1.14652	2.71393	1.24313	Up	7.76932e-08	3.10548e-07	ninein-like	K06102;K00688;K12478	GO:0015630//microtubule cytoskeleton;GO:0044444//cytoplasmic part	GO:0046872//metal ion binding	GO:0022402//cell cycle process	gi|4589604|dbj|BAA76824.1|/0/1
INPPL1	3636	4726	35.9526	83.2032	1.21054	Up	2.2221e-178	1.8478e-176	inositol polyphosphate phosphatase-like 1	K15909	GO:0016020//membrane;GO:0030864//cortical actin cytoskeleton;GO:0031252//cell leading edge	GO:0008092//cytoskeletal protein binding;GO:0019904//protein domain specific binding;GO:0035091//phosphatidylinositol binding;GO:0046030//inositol trisphosphate phosphatase activity	GO:0006260//DNA replication;GO:0006629//lipid metabolic process;GO:0007417//central nervous system development;GO:0008283//cell proliferation;GO:0009968//negative regulation of signal transduction;GO:0010467//gene expression;GO:0010975//regulation of neuron projection development;GO:0016192//vesicle-mediated transport;GO:0019318//hexose metabolic process;GO:0030036//actin cytoskeleton organizatio…	gi|222136583|ref|NP_001558.3|/0/1
PITPNC1	26207	6383	1.70098	3.86348	1.18354	Up	2.6988e-12	1.48717e-11	phosphatidylinositol transfer protein, cytoplasmic 1	K01106	GO:0043231//intracellular membrane-bounded organelle	GO:0005488//binding;GO:0005548//phospholipid transporter activity	GO:0006650//glycerophospholipid metabolic process;GO:0010876//lipid localization;GO:0023052//signaling;GO:0051234//establishment of localization	gi|32307142|ref|NP_858057.1|/1.28684e-159/1
FLJ42627	645644	7148	1.48762	3.32397	1.15991	Up	1.44103e-11	7.54864e-11	uncharacterized LOC645644	K06276	GO:0016020//membrane;GO:0034399//nuclear periphery;GO:0044444//cytoplasmic part	GO:0000166//nucleotide binding;GO:0004674//protein serine/threonine kinase activity;GO:0005515//protein binding;GO:0016564//transcription repressor activity	GO:0000122//negative regulation of transcription from RNA polymerase II promoter;GO:0006950//response to stress;GO:0007010//cytoskeleton organization;GO:0007169//transmembrane receptor protein tyrosine kinase signaling pathway;GO:0007267//cell-cell signaling;GO:0007599//hemostasis;GO:0010551;GO:0031294;GO:0032147//activation of protein kinase activity;GO:0032868//response to insulin stimulus;GO:0…	gi|426380847|ref|XP_004057071.1|/2.35002e-42/1
FOXO1	2308	5738	3.51127	7.71243	1.13519	Up	1.21603e-19	9.86415e-19	forkhead box O1	K07201	GO:0031981//nuclear lumen;GO:0043234//protein complex;GO:0044444//cytoplasmic part	GO:0000981//sequence-specific DNA binding RNA polymerase II transcription factor activity;GO:0003702//RNA polymerase II transcription factor activity;GO:0016564//transcription repressor activity;GO:0019900//kinase binding;GO:0043565//sequence-specific DNA binding;GO:0043566//structure-specific DNA binding	GO:0000122//negative regulation of transcription from RNA polymerase II promoter;GO:0001944//vasculature development;GO:0006094//gluconeogenesis;GO:0007169//transmembrane receptor protein tyrosine kinase signaling pathway;GO:0008283//cell proliferation;GO:0031016//pancreas development;GO:0032872//regulation of stress-activated MAPK cascade;GO:0043066//negative regulation of apoptotic process;GO:0…	gi|9257222|ref|NP_002006.2|/0/1
INSR	3643	9059	4.00329	8.22881	1.0395	Up	5.88672e-28	6.46836e-27	insulin receptor	K04527	GO:0005887//integral to plasma membrane;GO:0031090//organelle membrane;GO:0042598;GO:0043231//intracellular membrane-bounded organelle;GO:0044444//cytoplasmic part	GO:0004714//transmembrane receptor protein tyrosine kinase activity;GO:0005102//receptor binding;GO:0005520//insulin-like growth factor binding;GO:0017046//peptide hormone binding;GO:0019901//protein kinase binding;GO:0019902//phosphatase binding;GO:0019904//protein domain specific binding;GO:0031406//carboxylic acid binding;GO:0032559;GO:0032561//guanyl ribonucleotide binding;GO:0043169//cation …	GO:0000165//MAPK cascade;GO:0005979//regulation of glycogen biosynthetic process;GO:0006110//regulation of glycolysis;GO:0006275//regulation of DNA replication;GO:0006355//regulation of transcription, DNA-dependent;GO:0007088//regulation of mitosis;GO:0007169//transmembrane receptor protein tyrosine kinase signaling pathway;GO:0008283//cell proliferation;GO:0009101//glycoprotein biosynthetic proc…	gi|386830|gb|AAA59452.1|/0/1
PDE3B	5140	6091	6.15613	0.0369744	-7.37935	Down	5.56948e-97	2.13342e-95	phosphodiesterase 3B, cGMP-inhibited	K13296	GO:0031224//intrinsic to membrane;GO:0042598;GO:0043231//intracellular membrane-bounded organelle;GO:0043234//protein complex;GO:0044444//cytoplasmic part	GO:0004114//3',5'-cyclic-nucleotide phosphodiesterase activity;GO:0016208//AMP binding;GO:0019901//protein kinase binding;GO:0043169//cation binding	GO:0001775//cell activation;GO:0006195//purine nucleotide catabolic process;GO:0007162//negative regulation of cell adhesion;GO:0007169//transmembrane receptor protein tyrosine kinase signaling pathway;GO:0007599//hemostasis;GO:0009895;GO:0009968//negative regulation of signal transduction;GO:0031016//pancreas development;GO:0032868//response to insulin stimulus;GO:0033500//carbohydrate homeostas…	gi|40254434|ref|NP_000913.2|/0/1
TNS1	7145	10276	18.3865	0.120539	-7.25301	Down	0	0	tensin 1	K00665;K01110;K08855	GO:0005924//cell-substrate adherens junction;GO:0043232	GO:0008092//cytoskeletal protein binding	-	gi|397495609|ref|XP_003818640.1|/0/1
CHN1	1123	2523	6.16665	0.446316	-3.78835	Down	2.60396e-30	3.13612e-29	chimerin 1	K10360;K13736;K04450;K02649	GO:0044444//cytoplasmic part	GO:0008047//enzyme activator activity;GO:0030674//protein binding, bridging;GO:0043169//cation binding	GO:0009966//regulation of signal transduction;GO:0035556//intracellular signal transduction;GO:0043087//regulation of GTPase activity	gi|62089162|dbj|BAD93025.1|/1.09217e-172/1
PIK3R1	5295	6991	0.736496	0.0644288	-3.5149	Down	2.75006e-10	1.32445e-09	phosphoinositide-3-kinase, regulatory subunit 1 (alpha)	K02649	GO:0005624//membrane fraction;GO:0005942//phosphatidylinositol 3-kinase complex;GO:0016020//membrane;GO:0043231//intracellular membrane-bounded organelle	GO:0017046//peptide hormone binding;GO:0019900//kinase binding;GO:0019902//phosphatase binding;GO:0035004//phosphatidylinositol 3-kinase activity;GO:0035014//phosphatidylinositol 3-kinase regulator activity;GO:0035091//phosphatidylinositol binding;GO:0035258//steroid hormone receptor binding;GO:0070851//growth factor receptor binding	GO:0001101//response to acid;GO:0001932//regulation of protein phosphorylation;GO:0001952//regulation of cell-matrix adhesion;GO:0002027//regulation of heart rate;GO:0002762//negative regulation of myeloid leukocyte differentiation;GO:0006357//regulation of transcription from RNA polymerase II promoter;GO:0007162//negative regulation of cell adhesion;GO:0007169//transmembrane receptor protein tyr…	gi|32455252|ref|NP_852556.2|/0/1
TNS4	84951	4090	75.4784	6.71778	-3.49001	Down	0	0	tensin 4	K00665;K11447;K00939	GO:0005924//cell-substrate adherens junction;GO:0043232	GO:0008092//cytoskeletal protein binding	GO:0012501//programmed cell death;GO:0033036	gi|157738639|ref|NP_116254.4|/0/1
INPP5J	27124	2238	4.75133	0.805044	-2.56119	Down	5.56976e-15	3.59051e-14	inositol polyphosphate-5-phosphatase J	K01106	GO:0016020//membrane;GO:0030425//dendrite;GO:0030427//site of polarized growth;GO:0031252//cell leading edge;GO:0044424//intracellular part	GO:0019904//protein domain specific binding;GO:0034594//phosphatidylinositol trisphosphate phosphatase activity;GO:0046030//inositol trisphosphate phosphatase activity	GO:0001933//negative regulation of protein phosphorylation;GO:0010975//regulation of neuron projection development;GO:0031111//negative regulation of microtubule polymerization or depolymerization	gi|50726960|ref|NP_001002837.1|/0/1
PPP1R3C	5507	2576	7.03916	1.44254	-2.28679	Down	1.07328e-21	9.44715e-21	protein phosphatase 1, regulatory subunit 3C	K07189	GO:0042598;GO:0044444//cytoplasmic part	GO:0004721//phosphoprotein phosphatase activity;GO:0005515//protein binding	GO:0005978//glycogen biosynthetic process;GO:0005980//glycogen catabolic process	gi|4885559|ref|NP_005389.1|/0/1
PYGB	5834	4131	22.137	5.53351	-2.00019	Down	3.38862e-87	1.16097e-85	phosphorylase, glycogen; brain	K00688	GO:0000267//cell fraction;GO:0043005//neuron projection;GO:0044424//intracellular part	GO:0004645//phosphorylase activity;GO:0030246//carbohydrate binding;GO:0042802//identical protein binding;GO:0048037//cofactor binding	GO:0005977//glycogen metabolic process;GO:0019318//hexose metabolic process	gi|21361370|ref|NP_002853.2|/0/1
EIF4E2	9470	1014	94.9319	30.4279	-1.6415	Down	2.77218e-70	7.74899e-69	eukaryotic translation initiation factor 4E family member 2	K03259	GO:0034518//RNA cap binding complex;GO:0044424//intracellular part	GO:0008135//translation factor activity, nucleic acid binding	GO:0006412//translation	gi|4757702|ref|NP_004837.1|/9.20204e-144/1
PRKX	5613	6084	7.28547	2.46163	-1.56541	Down	3.5539e-31	4.4218e-30	protein kinase, X-linked	K04345	-	GO:0004690//cyclic nucleotide-dependent protein kinase activity;GO:0032559	GO:0006464//cellular protein modification process	gi|4826948|ref|NP_005035.1|/0/1
NKIRAS2	28511	2493	40.4982	13.7313	-1.56039	Down	1.50911e-68	4.10062e-67	NFKB inhibitor interacting Ras-like 2	K12734;K07976;K14693;K07208;K11447;K07994	GO:0044424//intracellular part	GO:0017111//nucleoside-triphosphatase activity;GO:0032561//guanyl ribonucleotide binding	GO:0007243//intracellular protein kinase cascade;GO:0009207	gi|222136630|ref|NP_001138400.1|/4.03321e-70/1
RALGAPA2	57186	9453	2.48657	0.929147	-1.42018	Down	3.88688e-15	2.52434e-14	Ral GTPase activating protein, alpha subunit 2 (catalytic)	K07207	GO:0043231//intracellular membrane-bounded organelle;GO:0044444//cytoplasmic part	GO:0005099//Ras GTPase activator activity;GO:0046983//protein dimerization activity	GO:0032852	gi|118600961|ref|NP_065076.2|/0/1
INPP5K	51763	3391	12.4111	4.74862	-1.38606	Down	4.97482e-25	4.96821e-24	inositol polyphosphate-5-phosphatase K	K01106	GO:0005626//insoluble fraction;GO:0031252//cell leading edge;GO:0042995//cell projection;GO:0043231//intracellular membrane-bounded organelle;GO:0044444//cytoplasmic part	GO:0005488//binding;GO:0046030//inositol trisphosphate phosphatase activity	GO:0007010//cytoskeleton organization	gi|18765709|ref|NP_057616.2|/0/1
FLOT2	2319	2659	91.8098	37.7328	-1.28283	Down	7.94826e-122	3.99781e-120	flotillin 2	K07192	GO:0005626//insoluble fraction;GO:0005901//caveola;GO:0043231//intracellular membrane-bounded organelle	GO:0035254//glutamate receptor binding	GO:0009888//tissue development;GO:0009987//cellular process	gi|94538362|ref|NP_004466.2|/0/1
PPP1R3F	89801	3448	5.16157	2.28607	-1.17494	Down	3.6622e-09	1.62081e-08	protein phosphatase 1, regulatory subunit 3F	K07189	GO:0016020//membrane;GO:0031224//intrinsic to membrane	-	-	gi|58761532|ref|NP_149992.3|/0/1
EIF4E3	317649	6222	2.35664	1.04968	-1.16678	Down	1.02899e-07	4.06877e-07	eukaryotic translation initiation factor 4E family member 3	K04301;K03259	GO:0034518//RNA cap binding complex;GO:0044424//intracellular part	GO:0008135//translation factor activity, nucleic acid binding	GO:0006412//translation	gi|345786362|ref|XP_541806.3|/1.61682e-82/1
ARAF	369	2571	76.58	34.1189	-1.1664	Down	3.78834e-85	1.25379e-83	v-raf murine sarcoma 3611 viral oncogene homolog	K08845	GO:0000267//cell fraction;GO:0043231//intracellular membrane-bounded organelle;GO:0044444//cytoplasmic part	GO:0004672//protein kinase activity;GO:0004871//signal transducer activity;GO:0032559;GO:0043169//cation binding	GO:0001934//positive regulation of protein phosphorylation;GO:0006915//apoptotic process;GO:0007165//signal transduction	gi|4502193|ref|NP_001645.1|/0/1
HK1	3098	3979	46.1341	20.7439	-1.15315	Down	4.15632e-78	1.2808e-76	hexokinase 1	K00844	GO:0031966//mitochondrial membrane;GO:0031981//nuclear lumen	GO:0004396//hexokinase activity;GO:0032559	GO:0006007//glucose catabolic process;GO:0006796//phosphate-containing compound metabolic process;GO:0008645//hexose transport	gi|62088632|dbj|BAD92763.1|/0/1
TCTEX1D2	255758	695	12.5621	5.67078	-1.14746	Down	5.2799e-05	0.00015834	Tctex1 domain containing 2	K11262;K10420;K11806	-	GO:0005488//binding	-	gi|229090471|ref|NP_689986.2|/2.01363e-78/1
MKNK1	8569	2827	18.1735	8.60374	-1.0788	Down	7.02376e-21	5.99738e-20	MAP kinase interacting serine/threonine kinase 1	K04372	GO:0043231//intracellular membrane-bounded organelle	GO:0004672//protein kinase activity;GO:0032559	GO:0006412//translation;GO:0006468//protein phosphorylation;GO:0035556//intracellular signal transduction	gi|397483191|ref|XP_003812787.1|/0/1
SORBS2	8470	6564	1.72228	0.82344	-1.06459	Down	1.45316e-05	4.63242e-05	sorbin and SH3 domain containing 2	K06086	GO:0005856//cytoskeleton;GO:0031674//I band;GO:0043005//neuron projection;GO:0043231//intracellular membrane-bounded organelle;GO:0044297//cell body;GO:0044430//cytoskeletal part;GO:0044459//plasma membrane part	GO:0005198//structural molecule activity;GO:0030674//protein binding, bridging;GO:0046914//transition metal ion binding	-	gi|40788362|dbj|BAA34497.2|/0/1
RTN3	10313	4976	79.8996	39.4889	-1.01674	Down	1.99794e-136	1.17658e-134	reticulon 3	K00688	GO:0012505//endomembrane system;GO:0031090//organelle membrane;GO:0031224//intrinsic to membrane;GO:0043231//intracellular membrane-bounded organelle;GO:0044421//extracellular region part	GO:0005488//binding	GO:0006810//transport;GO:0007029//endoplasmic reticulum organization;GO:0012501//programmed cell death;GO:0050896//response to stimulus;GO:0051704	gi|397489893|ref|XP_003815948.1|/4.39144e-128/1
⑤Cyanoamino acid metabolism
Symbol	GeneID	Gene_length	shNC-RPKM	shNrf1-RPKM	log2 Ratio(shNrf1/shNC)	Up-Down-Regulation(shNrf1/shNC)	P-value	FDR	Description	KEGG Orthology	GO Component	GO Function	GO Process	Blast nr
GGT1	2678	2431	1.24317	12.6919	3.35181	Up	3.2603e-53	6.80346e-52	gamma-glutamyltransferase 1	K00681	GO:0031224//intrinsic to membrane	GO:0005488//binding;GO:0016747//transferase activity, transferring acyl groups other than amino-acyl groups;GO:0016755	GO:0006749//glutathione metabolic process;GO:0048232//male gamete generation	gi|73915090|ref|NP_005256.2|/0/1
GGT7	2686	2640	0.25439	1.79145	2.81602	Up	5.11992e-08	2.07913e-07	gamma-glutamyltransferase 7	K00681	GO:0031224//intrinsic to membrane	GO:0016747//transferase activity, transferring acyl groups other than amino-acyl groups;GO:0016755	GO:0006749//glutathione metabolic process	gi|109148539|ref|NP_821158.2|/0/1
FAAH2	158584	2039	2.3605	4.97032	1.07425	Up	3.5405e-05	0.000107937	fatty acid amide hydrolase 2	K15528;K01426	GO:0031224//intrinsic to membrane	GO:0016879//ligase activity, forming carbon-nitrogen bonds	-	gi|195972892|ref|NP_777572.2|/0/1
GGT5	2687	2500	7.56656	0.0450422	-7.39222	Down	1.90746e-49	3.67886e-48	gamma-glutamyltransferase 5	K00681	GO:0031224//intrinsic to membrane	GO:0016747//transferase activity, transferring acyl groups other than amino-acyl groups;GO:0016755	GO:0006691//leukotriene metabolic process;GO:0006749//glutathione metabolic process;GO:0009058//biosynthetic process	gi|153266907|ref|NP_001093252.1|/0/1
SHMT1	6470	2540	51.603	22.3438	-1.20758	Down	1.94963e-60	4.59579e-59	serine hydroxymethyltransferase 1 (soluble)	K00600	GO:0043231//intracellular membrane-bounded organelle;GO:0044444//cytoplasmic part	GO:0004793//threonine aldolase activity;GO:0016742//hydroxymethyl-, formyl- and related transferase activity;GO:0031406//carboxylic acid binding;GO:0042802//identical protein binding;GO:0048037//cofactor binding	GO:0006144//purine nucleobase metabolic process;GO:0006545//glycine biosynthetic process;GO:0006563//L-serine metabolic process;GO:0006575//cellular modified amino acid metabolic process;GO:0006578//amino-acid betaine biosynthetic process;GO:0006766//vitamin metabolic process;GO:0051260//protein homooligomerization	gi|22547189|ref|NP_683718.1|/0/1
⑤Pyruvate metabolism
Symbol	GeneID	Gene_length	shNC-RPKM	shNrf1-RPKM	log2 Ratio(shNrf1/shNC)	Up-Down-Regulation(shNrf1/shNC)	P-value	FDR	Description	KEGG Orthology	GO Component	GO Function	GO Process	Blast nr
C5orf63	401207	5680	0.177356	1.01107	2.51116	Up	1.58221e-08	6.69112e-08	chromosome 5 open reading frame 63	K00626	-	-	GO:0006091//generation of precursor metabolites and energy;GO:0051234//establishment of localization	gi|256773207|ref|NP_001157951.1|/3.89131e-67/1
ME3	10873	2329	2.21075	12.5708	2.50747	Up	6.48826e-38	9.52686e-37	malic enzyme 3, NADP(+)-dependent, mitochondrial	K00029	GO:0044429//mitochondrial part	GO:0000166//nucleotide binding;GO:0004470//malic enzyme activity;GO:0043169//cation binding	GO:0032787//monocarboxylic acid metabolic process;GO:0043648//dicarboxylic acid metabolic process;GO:0045333//cellular respiration	gi|62420880|ref|NP_006671.2|/0/1
LDHD	197257	2096	1.28166	5.69474	2.15162	Up	8.14562e-14	4.92307e-13	lactate dehydrogenase D	K00102	GO:0043231//intracellular membrane-bounded organelle	GO:0004457//lactate dehydrogenase activity;GO:0050662//coenzyme binding	GO:0008152//metabolic process	gi|37595756|ref|NP_919417.1|/0/1
HAGHL	84264	1379	4.05843	12.4119	1.61273	Up	1.78425e-13	1.05941e-12	hydroxyacylglutathione hydrolase-like	K01069	-	GO:0003824//catalytic activity;GO:0043169//cation binding	-	gi|397474890|ref|XP_003808889.1|/1.12621e-172/1
ACYP2	98	1238	2.35074	7.18565	1.612	Up	1.20962e-07	4.7478e-07	acylphosphatase 2, muscle type	K01512	GO:0043231//intracellular membrane-bounded organelle	GO:0016818//hydrolase activity, acting on acid anhydrides, in phosphorus-containing anhydrides	GO:0006793//phosphorus metabolic process	gi|119620559|gb|EAX00154.1|/1.03852e-49/1
ETHE1	23474	978	24.3777	59.0661	1.27677	Up	5.68042e-30	6.73832e-29	ethylmalonic encephalopathy 1	K01069	GO:0044429//mitochondrial part	GO:0003824//catalytic activity;GO:0043169//cation binding	-	gi|41327741|ref|NP_055112.2|/3.49906e-145/1
ALDH2	217	2076	20.3267	41.3863	1.02578	Up	2.56082e-31	3.19822e-30	aldehyde dehydrogenase 2 family (mitochondrial)	K00128	GO:0044429//mitochondrial part	GO:0004030//aldehyde dehydrogenase [NAD(P)+] activity;GO:0005515//protein binding	GO:0002237//response to molecule of bacterial origin;GO:0006067//ethanol metabolic process;GO:0006950//response to stress;GO:0014070//response to organic cyclic compound;GO:0042133//neurotransmitter metabolic process;GO:0044238//primary metabolic process;GO:0048513//organ development;GO:0048545//response to steroid hormone stimulus;GO:0070542//response to fatty acid	gi|397525087|ref|XP_003832509.1|/0/1
ACSS2	55902	3027	80.9811	164.165	1.01949	Up	6.95972e-171	5.53699e-169	acyl-CoA synthetase short-chain family member 2	K01895	GO:0031981//nuclear lumen;GO:0044444//cytoplasmic part	GO:0016405//CoA-ligase activity;GO:0032559	GO:0006067//ethanol metabolic process;GO:0006629//lipid metabolic process;GO:0044237//cellular metabolic process	gi|8923896|ref|NP_061147.1|/0/1
ACYP1	97	700	9.11441	3.05643	-1.5763	Down	1.10144e-05	3.56267e-05	acylphosphatase 1, erythrocyte (common) type	K01512	-	GO:0016818//hydrolase activity, acting on acid anhydrides, in phosphorus-containing anhydrides	GO:0006793//phosphorus metabolic process	gi|109071964|ref|XP_001090451.1|/3.4059e-65/1
D2HGDH	728294	2604	2.10624	0.778379	-1.43612	Down	0.000144414	0.00041139	D-2-hydroxyglutarate dehydrogenase	K00102	GO:0044429//mitochondrial part	GO:0016614//oxidoreductase activity, acting on CH-OH group of donors;GO:0050662//coenzyme binding	GO:0010038//response to metal ion;GO:0019538//protein metabolic process;GO:0043648//dicarboxylic acid metabolic process	gi|119964728|ref|NP_689996.4|/0/1
LACTB2	51110	1553	9.22551	4.06047	-1.18398	Down	1.0294e-07	4.0694e-07	lactamase, beta 2	K01069	GO:0043231//intracellular membrane-bounded organelle	GO:0003824//catalytic activity;GO:0043169//cation binding	-	gi|7705793|ref|NP_057111.1|/1.37259e-153/1
TCTEX1D2	255758	695	12.5621	5.67078	-1.14746	Down	5.2799e-05	0.00015834	Tctex1 domain containing 2	K11262;K10420;K11806	-	GO:0005488//binding	-	gi|229090471|ref|NP_689986.2|/2.01363e-78/1
GRHPR	9380	1235	99.5147	47.0481	-1.08077	Down	8.20138e-48	1.52148e-46	glyoxylate reductase/hydroxypyruvate reductase	K00049	GO:0044439	GO:0000166//nucleotide binding;GO:0016616//oxidoreductase activity, acting on the CH-OH group of donors, NAD or NADP as acceptor	GO:0003008;GO:0006081//cellular aldehyde metabolic process;GO:0006807//nitrogen compound metabolic process	gi|112490731|pdb|2GCG|A/9.0182e-179/1
⑥Inositol phosphate metabolism
Symbol	GeneID	Gene_length	shNC-RPKM	shNrf1-RPKM	log2 Ratio(shNrf1/shNC)	Up-Down-Regulation(shNrf1/shNC)	P-value	FDR	Description	KEGG Orthology	GO Component	GO Function	GO Process	Blast nr
PLCE1	51196	7992	0.01	0.507232	5.66457	Up	1.30199e-11	6.84629e-11	phospholipase C, epsilon 1	K05860	GO:0005626//insoluble fraction;GO:0012505//endomembrane system;GO:0016020//membrane;GO:0043231//intracellular membrane-bounded organelle;GO:0044444//cytoplasmic part	GO:0004629//phospholipase C activity;GO:0004871//signal transducer activity;GO:0030695//GTPase regulator activity;GO:0031267//small GTPase binding;GO:0046872//metal ion binding	GO:0000165//MAPK cascade;GO:0001932//regulation of protein phosphorylation;GO:0006937//regulation of muscle contraction;GO:0006996//organelle organization;GO:0007169//transmembrane receptor protein tyrosine kinase signaling pathway;GO:0007186//G-protein coupled receptor signaling pathway;GO:0016049//cell growth;GO:0019637//organophosphate metabolic process;GO:0019932//second-messenger-mediated si…	gi|34303900|dbj|BAA96040.2|/0/1
PLCB2	5330	4694	0.190765	3.04663	3.99735	Up	4.01146e-29	4.62912e-28	phospholipase C, beta 2	K05858	GO:0016020//membrane;GO:0043231//intracellular membrane-bounded organelle;GO:0044444//cytoplasmic part	GO:0004629//phospholipase C activity;GO:0008289//lipid binding;GO:0046872//metal ion binding;GO:0060089	GO:0006629//lipid metabolic process;GO:0007165//signal transduction;GO:0007267//cell-cell signaling;GO:0010863//positive regulation of phospholipase C activity;GO:0019637//organophosphate metabolic process;GO:0050912//detection of chemical stimulus involved in sensory perception of taste	gi|95147333|ref|NP_004564.2|/0/1
ITPKC	80271	3398	1.67996	5.00395	1.57464	Up	5.45226e-13	3.14369e-12	inositol-trisphosphate 3-kinase C	K00911	GO:0043231//intracellular membrane-bounded organelle	GO:0005515//protein binding;GO:0032559;GO:0051766//inositol trisphosphate kinase activity	-	gi|18643383|ref|NP_079470.1|/0/1
ALDH6A1	4329	2183	5.07614	11.8641	1.2248	Up	1.78785e-13	1.06117e-12	aldehyde dehydrogenase 6 family, member A1	K00140	GO:0031981//nuclear lumen;GO:0044429//mitochondrial part	GO:0005504//fatty acid binding;GO:0016620//oxidoreductase activity, acting on the aldehyde or oxo group of donors, NAD or NADP as acceptor;GO:0016788//hydrolase activity, acting on ester bonds	GO:0006208//pyrimidine nucleobase catabolic process;GO:0006573//valine metabolic process;GO:0009063//cellular amino acid catabolic process;GO:0045444//fat cell differentiation	gi|11095441|ref|NP_005580.1|/0/1
INPPL1	3636	4726	35.9526	83.2032	1.21054	Up	2.2221e-178	1.8478e-176	inositol polyphosphate phosphatase-like 1	K15909	GO:0016020//membrane;GO:0030864//cortical actin cytoskeleton;GO:0031252//cell leading edge	GO:0008092//cytoskeletal protein binding;GO:0019904//protein domain specific binding;GO:0035091//phosphatidylinositol binding;GO:0046030//inositol trisphosphate phosphatase activity	GO:0006260//DNA replication;GO:0006629//lipid metabolic process;GO:0007417//central nervous system development;GO:0008283//cell proliferation;GO:0009968//negative regulation of signal transduction;GO:0010467//gene expression;GO:0010975//regulation of neuron projection development;GO:0016192//vesicle-mediated transport;GO:0019318//hexose metabolic process;GO:0030036//actin cytoskeleton organizatio…	gi|222136583|ref|NP_001558.3|/0/1
PITPNC1	26207	6383	1.70098	3.86348	1.18354	Up	2.6988e-12	1.48717e-11	phosphatidylinositol transfer protein, cytoplasmic 1	K01106	GO:0043231//intracellular membrane-bounded organelle	GO:0005488//binding;GO:0005548//phospholipid transporter activity	GO:0006650//glycerophospholipid metabolic process;GO:0010876//lipid localization;GO:0023052//signaling;GO:0051234//establishment of localization	gi|32307142|ref|NP_858057.1|/1.28684e-159/1
PIK3C2B	5287	7606	13.7891	28.9286	1.06897	Up	8.77284e-83	2.82988e-81	phosphatidylinositol-4-phosphate 3-kinase, catalytic subunit type 2 beta	K00923	GO:0016020//membrane;GO:0016023//cytoplasmic membrane-bounded vesicle;GO:0042598;GO:0043234//protein complex	GO:0005543//phospholipid binding;GO:0016307//phosphatidylinositol phosphate kinase activity;GO:0032559;GO:0035004//phosphatidylinositol 3-kinase activity	GO:0007243//intracellular protein kinase cascade;GO:0046488//phosphatidylinositol metabolic process;GO:0048017//inositol lipid-mediated signaling	gi|68533067|dbj|BAE06088.1|/0/1
TNS1	7145	10276	18.3865	0.120539	-7.25301	Down	0	0	tensin 1	K00665;K01110;K08855	GO:0005924//cell-substrate adherens junction;GO:0043232	GO:0008092//cytoskeletal protein binding	-	gi|397495609|ref|XP_003818640.1|/0/1
PIP5K1B	8395	2654	0.590444	0.01	-5.88373	Down	6.38422e-05	0.000189534	phosphatidylinositol-4-phosphate 5-kinase, type I, beta	K00889	GO:0031254//trailing edge	GO:0016307//phosphatidylinositol phosphate kinase activity;GO:0032559	GO:0006796//phosphate-containing compound metabolic process;GO:0046488//phosphatidylinositol metabolic process	gi|4505817|ref|NP_003549.1|/0/1
PLCB1	23236	7221	0.263514	0.01	-4.71981	Down	8.05236e-06	2.64543e-05	phospholipase C, beta 1 (phosphoinositide-specific)	K05858	GO:0000785//chromatin;GO:0005626//insoluble fraction;GO:0016604//nuclear body;GO:0044444//cytoplasmic part	GO:0004629//phospholipase C activity;GO:0008047//enzyme activator activity;GO:0030528//transcription regulator activity;GO:0035091//phosphatidylinositol binding;GO:0042802//identical protein binding;GO:0046872//metal ion binding;GO:0060089	GO:0001819//positive regulation of cytokine production;GO:0002573//myeloid leukocyte differentiation;GO:0006650//glycerophospholipid metabolic process;GO:0007169//transmembrane receptor protein tyrosine kinase signaling pathway;GO:0007186//G-protein coupled receptor signaling pathway;GO:0007267//cell-cell signaling;GO:0007340//acrosome reaction;GO:0007611//learning or memory;GO:0009101//glycoprot…	gi|58257731|dbj|BAA25507.3|/0/1
PLCB4	5332	5640	3.49289	0.199655	-4.12884	Down	2.01014e-40	3.11167e-39	phospholipase C, beta 4	K05858	GO:0005783//endoplasmic reticulum;GO:0042598;GO:0043005//neuron projection;GO:0044430//cytoskeletal part;GO:0044444//cytoplasmic part	GO:0004629//phospholipase C activity;GO:0019901//protein kinase binding;GO:0046872//metal ion binding;GO:0060089	GO:0006629//lipid metabolic process;GO:0006813//potassium ion transport;GO:0007165//signal transduction	gi|289547594|ref|NP_001166117.1|/0/1
INPP5J	27124	2238	4.75133	0.805044	-2.56119	Down	5.56976e-15	3.59051e-14	inositol polyphosphate-5-phosphatase J	K01106	GO:0016020//membrane;GO:0030425//dendrite;GO:0030427//site of polarized growth;GO:0031252//cell leading edge;GO:0044424//intracellular part	GO:0019904//protein domain specific binding;GO:0034594//phosphatidylinositol trisphosphate phosphatase activity;GO:0046030//inositol trisphosphate phosphatase activity	GO:0001933//negative regulation of protein phosphorylation;GO:0010975//regulation of neuron projection development;GO:0031111//negative regulation of microtubule polymerization or depolymerization	gi|50726960|ref|NP_001002837.1|/0/1
PTEN	5728	5572	16.7535	3.51639	-2.2523	Down	3.21642e-103	1.31746e-101	phosphatase and tensin homolog	K01110	GO:0005624//membrane fraction;GO:0016604//nuclear body;GO:0030425//dendrite;GO:0044444//cytoplasmic part;GO:0044459//plasma membrane part	GO:0004721//phosphoprotein phosphatase activity;GO:0019904//protein domain specific binding;GO:0034593//phosphatidylinositol bisphosphate phosphatase activity;GO:0034594//phosphatidylinositol trisphosphate phosphatase activity;GO:0046872//metal ion binding;GO:0070851//growth factor receptor binding	GO:0001783//B cell apoptotic process;GO:0001932//regulation of protein phosphorylation;GO:0001953//negative regulation of cell-matrix adhesion;GO:0003006//developmental process involved in reproduction;GO:0006470//protein dephosphorylation;GO:0007169//transmembrane receptor protein tyrosine kinase signaling pathway;GO:0007611//learning or memory;GO:0008285//negative regulation of cell proliferati…	gi|441642378|ref|XP_003262607.2|/0/1
INPP5K	51763	3391	12.4111	4.74862	-1.38606	Down	4.97482e-25	4.96821e-24	inositol polyphosphate-5-phosphatase K	K01106	GO:0005626//insoluble fraction;GO:0031252//cell leading edge;GO:0042995//cell projection;GO:0043231//intracellular membrane-bounded organelle;GO:0044444//cytoplasmic part	GO:0005488//binding;GO:0046030//inositol trisphosphate phosphatase activity	GO:0007010//cytoskeleton organization	gi|18765709|ref|NP_057616.2|/0/1
TPI1	7167	1602	888.674	348.852	-1.34904	Down	0	0	triosephosphate isomerase 1	K01803	GO:0000267//cell fraction;GO:0043231//intracellular membrane-bounded organelle;GO:0044444//cytoplasmic part	GO:0016861//intramolecular oxidoreductase activity, interconverting aldoses and ketoses	GO:0006007//glucose catabolic process;GO:0006631//fatty acid metabolic process;GO:0007275//multicellular organismal development	gi|66360365|pdb|1WYI|A/2.80046e-117/1
PLCD3	113026	3477	132.244	59.0717	-1.16267	Down	2.8188e-195	2.56294e-193	phospholipase C, delta 3	K05857	GO:0032155;GO:0044424//intracellular part	GO:0004629//phospholipase C activity;GO:0046872//metal ion binding;GO:0060089	GO:0006629//lipid metabolic process;GO:0007165//signal transduction;GO:0008283//cell proliferation;GO:0048568//embryonic organ development;GO:0048646//anatomical structure formation involved in morphogenesis	gi|19115964|ref|NP_588614.1|/0/1
IMPA1	3612	3597	4.44987	2.00354	-1.15121	Down	3.75298e-08	1.5399e-07	inositol(myo)-1(or 4)-monophosphatase 1	K01092	GO:0043005//neuron projection;GO:0044297//cell body;GO:0044424//intracellular part	GO:0004437//inositol or phosphatidylinositol phosphatase activity;GO:0042802//identical protein binding;GO:0043169//cation binding	GO:0010038//response to metal ion;GO:0023052//signaling;GO:0046474//glycerophospholipid biosynthetic process;GO:0046838//phosphorylated carbohydrate dephosphorylation	gi|221625487|ref|NP_001138350.1|/5.45738e-134/1
IPPK	64768	4401	6.20569	2.84008	-1.12766	Down	1.4658e-12	8.20847e-12	inositol 1,3,4,5,6-pentakisphosphate 2-kinase	K10572	GO:0043231//intracellular membrane-bounded organelle	GO:0004428//inositol or phosphatidylinositol kinase activity;GO:0032559	GO:0006020//inositol metabolic process	gi|332222752|ref|XP_003260534.1|/0/1
PI4K2A	55361	4185	23.5898	10.8166	-1.12492	Down	3.1997e-41	5.06201e-40	phosphatidylinositol 4-kinase type 2 alpha	K13711	GO:0005769//early endosome;GO:0008021//synaptic vesicle;GO:0016021//integral to membrane;GO:0030133//transport vesicle;GO:0032991//macromolecular complex;GO:0042598;GO:0043025//neuronal cell body	GO:0001727//lipid kinase activity;GO:0005515//protein binding;GO:0032559;GO:0046872//metal ion binding	GO:0002276;GO:0006796//phosphate-containing compound metabolic process;GO:0046474//glycerophospholipid biosynthetic process;GO:0046488//phosphatidylinositol metabolic process	gi|13559514|ref|NP_060895.1|/0/1
IMPAD1	54928	7242	22.7047	10.7132	-1.0836	Down	1.24294e-63	3.10698e-62	inositol monophosphatase domain containing 1	K15759	GO:0031224//intrinsic to membrane;GO:0043231//intracellular membrane-bounded organelle	GO:0004437//inositol or phosphatidylinositol phosphatase activity;GO:0008252//nucleotidase activity;GO:0043169//cation binding	GO:0001503//ossification;GO:0002062//chondrocyte differentiation;GO:0006790//sulfur compound metabolic process;GO:0006796//phosphate-containing compound metabolic process;GO:0030326//embryonic limb morphogenesis	gi|332213862|ref|XP_003256050.1|/0/1
IMPA2	3613	1537	176.6	84.7655	-1.05893	Down	4.3622e-100	1.73941e-98	inositol(myo)-1(or 4)-monophosphatase 2	K01092	GO:0044424//intracellular part	GO:0004437//inositol or phosphatidylinositol phosphatase activity;GO:0042802//identical protein binding;GO:0043169//cation binding	GO:0019751//polyol metabolic process;GO:0023052//signaling;GO:0046838//phosphorylated carbohydrate dephosphorylation	gi|112490221|pdb|2CZH|A/2.45626e-163/1
⑥Sulfur metabolism
Symbol	GeneID	Gene_length	shNC-RPKM	shNrf1-RPKM	log2 Ratio(shNrf1/shNC)	Up-Down-Regulation(shNrf1/shNC)	P-value	FDR	Description	KEGG Orthology	GO Component	GO Function	GO Process	Blast nr
SULT1E1	6783	1805	1.11621	0.01	-6.80247	Down	4.03828e-06	1.36713e-05	sulfotransferase family 1E, estrogen-preferring, member 1	K01016	GO:0005635//nuclear envelope;GO:0044444//cytoplasmic part	GO:0008146//sulfotransferase activity;GO:0008289//lipid binding	GO:0006790//sulfur compound metabolic process;GO:0008202//steroid metabolic process;GO:0022414//reproductive process	gi|4885617|ref|NP_005411.1|/1.54005e-175/1
SULT1A2	6799	1348	0.996422	0.01	-6.63868	Down	0.000253842	0.00069928	sulfotransferase family, cytosolic, 1A, phenol-preferring, member 2	K01014	GO:0044444//cytoplasmic part	GO:0008146//sulfotransferase activity	GO:0006576//cellular biogenic amine metabolic process;GO:0006629//lipid metabolic process;GO:0006790//sulfur compound metabolic process;GO:0009698//phenylpropanoid metabolic process	gi|4507303|ref|NP_001045.1|/1.63458e-160/1
CHST11	50515	5768	5.78286	0.87851	-2.71865	Down	8.08516e-47	1.45586e-45	carbohydrate (chondroitin 4) sulfotransferase 11	K01017	GO:0012505//endomembrane system;GO:0031224//intrinsic to membrane;GO:0043231//intracellular membrane-bounded organelle	GO:0034481//chondroitin sulfotransferase activity	GO:0002062//chondrocyte differentiation;GO:0006024//glycosaminoglycan biosynthetic process;GO:0006790//sulfur compound metabolic process;GO:0006915//apoptotic process;GO:0007179//transforming growth factor beta receptor signaling pathway;GO:0008283//cell proliferation;GO:0030326//embryonic limb morphogenesis;GO:0033036;GO:0040007//growth;GO:0048562//embryonic organ morphogenesis	gi|8923758|ref|NP_060883.1|/0/1
PAPSS2	9060	3874	27.0727	10.6966	-1.33968	Down	5.84498e-57	1.29829e-55	3'-phosphoadenosine 5'-phosphosulfate synthase 2	K13811	GO:0044444//cytoplasmic part	GO:0004779//sulfate adenylyltransferase activity;GO:0016301//kinase activity;GO:0032559	GO:0006790//sulfur compound metabolic process;GO:0006796//phosphate-containing compound metabolic process;GO:0007599//hemostasis;GO:0034036;GO:0048731	gi|62912492|ref|NP_001015880.1|/0/1
IMPAD1	54928	7242	22.7047	10.7132	-1.0836	Down	1.24294e-63	3.10698e-62	inositol monophosphatase domain containing 1	K15759	GO:0031224//intrinsic to membrane;GO:0043231//intracellular membrane-bounded organelle	GO:0004437//inositol or phosphatidylinositol phosphatase activity;GO:0008252//nucleotidase activity;GO:0043169//cation binding	GO:0001503//ossification;GO:0002062//chondrocyte differentiation;GO:0006790//sulfur compound metabolic process;GO:0006796//phosphate-containing compound metabolic process;GO:0030326//embryonic limb morphogenesis	gi|332213862|ref|XP_003256050.1|/0/1
